# Supplementary material
Source: publisher figshare collection journal article supplement (https://gsajournals.figshare.com/ndownloader/files/28518015)
Supplement: Supplementary file 1 [file 28518015]

## Sheet: Seg 1 LT2 vs STK005 align extr1
Sequence Name	Minimum	Maximum	Min (original sequence)	Max (original sequence)	Length	locus_tag	Name	Polymorphism Type	Change	CDS	Protein Effect	CDS Codon Number	Amino Acid Change	product	note
Salmonella enterica subsp. enterica serovar Typhimurium - CP067397 (bases 1 to 4796208) extraction	191	311	191	311	121		misc								Thr leader region; Derived by automated computational analysis using gene prediction method: cmsearch.
Salmonella enterica subsp. enterica serovar Typhimurium str. LT2 - NC_003197.2 (bases 1 to 4857450) extraction	53167	53167	53167	53167	1	STM0045	T	SNP (transition)	C -> T	ribF CDS	Substitution	99	A -> V	riboflavin biosynthesis protein RibF	similar to E. coli putative regulator (AAC73136.1);Blastp hit to AAC73136.1 (313 aa), 89% identity in aa 1 -309
Salmonella enterica subsp. enterica serovar Typhimurium str. LT2 - NC_003197.2 (bases 1 to 4857450) extraction	56003	56003	56003	56003	1	STM0046	T	SNP (transition)	C -> T	ileS CDS	None	717		isoleucine--tRNA ligase	similar to E. coli isoleucine tRNA synthetase (AAC73137.1); Blastp hit to AAC73137.1 (938 aa), 87% identity in aa 1 - 938
Salmonella enterica subsp. enterica serovar Typhimurium str. LT2 - NC_003197.2 (bases 1 to 4857450) extraction	65258	65258	65258	65258	1	STM0055	T	SNP (transition)	C -> T	oxaloacetate decarboxylase subunit alpha CDS	None	460		oxaloacetate decarboxylase subunit alpha	oxaloacetate decarboxylase alpha chain. (SW:DCOA_SALTY)
Salmonella enterica subsp. enterica serovar Typhimurium str. LT2 - NC_003197.2 (bases 1 to 4857450) extraction	70421	70421	70421	70421	1	STM0060	T	SNP (transition)	C -> T	citE2 CDS	Substitution	141	A -> V	citrate (pro-3S)-lyase subunit beta	similar to E. coli citrate lyase beta chain (acyl lyase subunit) (AAC73717.1); Blastp hit to AAC73717.1 (307 aa), 63% identity in aa 17 - 306
Salmonella enterica subsp. enterica serovar Typhimurium str. LT2 - NC_003197.2 (bases 1 to 4857450) extraction	76637	76637	76637	76637	1	STM0066	T	SNP (transition)	C -> T	carA CDS	Substitution	253	T -> I	carbamoyl phosphate synthase small subunit	carbamoyl-phosphate synthase small chain. (SW:CARA_SALTY)
Salmonella enterica subsp. enterica serovar Typhimurium str. LT2 - NC_003197.2 (bases 1 to 4857450) extraction	76980	76980	76980	76980	1	STM0066	T	SNP (transition)	C -> T	carA CDS	None	367		carbamoyl phosphate synthase small subunit	carbamoyl-phosphate synthase small chain. (SW:CARA_SALTY)
Salmonella enterica subsp. enterica serovar Typhimurium str. LT2 - NC_003197.2 (bases 1 to 4857450) extraction	82300	82300	82300	82300	1	STM0070	T	SNP (transition)	C -> T	caiD CDS	Substitution	71	E -> K	carnitinyl-CoA dehydratase	similar to E. coli carnitine racemase (AAC73147.1);Blastp hit to AAC73147.1 (297 aa), 93% identity in aa 37 -297
Salmonella enterica subsp. enterica serovar Typhimurium str. LT2 - NC_003197.2 (bases 1 to 4857450) extraction	90530	90530	90530	90530	1	STM0077	T	SNP (transition)	C -> T	fixC CDS	Substitution	24	L -> F	oxidoreductase	similar to E. coli flavoprotein; electron transport(AAC73154.1); Blastp hit to AAC73154.1 (428 aa), 88%identity in aa 1 - 428
Salmonella enterica subsp. enterica serovar Typhimurium str. LT2 - NC_003197.2 (bases 1 to 4857450) extraction	91514	91514	91514	91514	1	STM0077	T	SNP (transition)	C -> T	fixC CDS	None	352		oxidoreductase	similar to E. coli flavoprotein; electron transport(AAC73154.1); Blastp hit to AAC73154.1 (428 aa), 88%identity in aa 1 - 428
Salmonella enterica subsp. enterica serovar Typhimurium str. LT2 - NC_003197.2 (bases 1 to 4857450) extraction	92645	92645	92645	92645	1	STM0079	T	SNP (transition)	C -> T	yaaU CDS	None	156		MFS transporter	similar to E. coli putative transport protein (AAC73156.1); Blastp hit to AAC73156.1 (443 aa), 86% identity in aa 1 - 439
Salmonella enterica subsp. enterica serovar Typhimurium str. LT2 - NC_003197.2 (bases 1 to 4857450) extraction	105687	105687	105687	105687	1	STM0092	T	SNP (transition)	C -> T	surA CDS	Substitution	24	V -> I	peptidylprolyl isomerase SurA	survival protein; similar to E. coli survival protein (AAC73164.1); Blastp hit to AAC73164.1 (428 aa), 91% identity in aa 1 - 428
Salmonella enterica subsp. enterica serovar Typhimurium str. LT2 - NC_003197.2 (bases 1 to 4857450) extraction	105704	105704	105704	105704	1	STM0092	T	SNP (transition)	C -> T	surA CDS	Substitution	18	S -> N	peptidylprolyl isomerase SurA	survival protein; similar to E. coli survival protein (AAC73164.1); Blastp hit to AAC73164.1 (428 aa), 91% identity in aa 1 - 428
Salmonella enterica subsp. enterica serovar Typhimurium str. LT2 - NC_003197.2 (bases 1 to 4857450) extraction	106292	106292	106292	106292	1	STM0093	T	SNP (transition)	C -> T	imp CDS	Substitution	627	G -> R	LPS assembly protein LptD	similar to E. coli organic solvent tolerance (AAC73165.1); Blastp hit to AAC73165.1 (784 aa), 91% identity in aa 1 - 784
Salmonella enterica subsp. enterica serovar Typhimurium str. LT2 - NC_003197.2 (bases 1 to 4857450) extraction	119477	119477	119477	119477	1	STM0102	T	SNP (transition)	C -> T	araA CDS	Substitution	35	V -> I	L-arabinose isomerase	L-arabinose isomerase. (SW:ARAA_SALTY)
Salmonella enterica subsp. enterica serovar Typhimurium str. LT2 - NC_003197.2 (bases 1 to 4857450) extraction	124901	124901	124901	124901	1	STM0107	T	SNP (transition)	C -> T	yabK CDS	Substitution	271	G -> R	thiamine/thiamine pyrophosphate ABC transporter permease ThiP	similar to E. coli putative transport system permease protein (AAC73178.1); Blastp hit to AAC73178.1 (536 aa), 89% identity in aa 1 - 536
Salmonella enterica subsp. enterica serovar Typhimurium str. LT2 - NC_003197.2 (bases 1 to 4857450) extraction	133315	133315	133315	133315	1	STM0113	T	SNP (transition)	C -> T	leuA CDS	Substitution	142	D -> N	2-isopropylmalate synthase	similar to E. coli 2-isopropylmalate synthase (AAC73185.1); Blastp hit to AAC73185.1 (523 aa), 92% identity in aa 1 - 523
Salmonella enterica subsp. enterica serovar Typhimurium str. LT2 - NC_003197.2 (bases 1 to 4857450) extraction	134997	134997	134997	134997	1	STM0115	T	SNP (transition)	C -> T	leuO CDS	None	143		transcriptional regulator LeuO	probable activator protein in leuabcd operon. (SW:LEUO_SALTY)
Salmonella enterica subsp. enterica serovar Typhimurium str. LT2 - NC_003197.2 (bases 1 to 4857450) extraction	148477	148477	148477	148477	1	STM0126	T	SNP (transition)	C -> T	murD CDS	None	360		UDP-N-acetylmuramoyl-L-alanine--D-glutamate ligase	similar to E. coli UDP-N-acetylmuramoylalanine-D-glutamate ligase (AAC73199.1); Blastp hit to AAC73199.1 (438 aa), 92% identity in aa 1 - 438
Salmonella enterica subsp. enterica serovar Typhimurium str. LT2 - NC_003197.2 (bases 1 to 4857450) extraction	153422	153422	153422	153422	1	STM0130	T	SNP (transition)	C -> T	ddlB CDS	Substitution	271	A -> V	D-alanine--D-alanine ligase	affects cell division; similar to E. coli D-alanine-D-alanine ligase B, affects cell division (AAC73203.1); Blastp hit to AAC73203.1 (306 aa), 90% identity in aa 1 - 306
Salmonella enterica subsp. enterica serovar Typhimurium str. LT2 - NC_003197.2 (bases 1 to 4857450) extraction	160259	160259	160259	160259	1	STM0136	T	SNP (transition)	C -> T	secA CDS	Substitution	524	A -> V	preprotein translocase subunit SecA	similar to E. coli preprotein translocase; secretion protein (AAC73209.1); Blastp hit to AAC73209.1 (901 aa), 95% identity in aa 1 - 900
Salmonella enterica subsp. enterica serovar Typhimurium str. LT2 - NC_003197.2 (bases 1 to 4857450) extraction	166192	166192	166192	166192	1	STM0142	T	SNP (transition)	C -> T	hofC CDS	None	46		type IV pilin biogenesis protein	similar to E. coli putative integral membrane protein involved in biogenesis of fimbriae, protein transport, DNA uptake (AAC73217.1); Blastp hit to AAC73217.1 (400 aa), 67% identity in aa 1 - 400
Salmonella enterica subsp. enterica serovar Typhimurium str. LT2 - NC_003197.2 (bases 1 to 4857450) extraction	173173	173173	173173	173173	1	STM0149	T	SNP (transition)	C -> T	MFS transporter CDS	Substitution	15	G -> D	MFS transporter	hypothetical protein (gi|7688349)
Salmonella enterica subsp. enterica serovar Typhimurium str. LT2 - NC_003197.2 (bases 1 to 4857450) extraction	175568	175568	175568	175568	1	STM0151	T	SNP (transition)	C -> T	pdhR CDS	Substitution	85	P -> S	transcriptional regulator PdhR	similar to E. coli transcriptional regulator for pyruvate dehydrogenase complex (AAC73224.1); Blastp hit to AAC73224.1 (254 aa), 96% identity in aa 1 - 254
Salmonella enterica subsp. enterica serovar Typhimurium str. LT2 - NC_003197.2 (bases 1 to 4857450) extraction	183988	183988	183988	183988	1	STM0157	T	SNP (transition)	C -> T	yacH CDS	Substitution	494	S -> N	hypothetical protein	similar to E. coli putative membrane protein (AAC73228.1); Blastp hit to AAC73228.1 (617 aa), 29% identity in aa 3 - 523
Salmonella enterica subsp. enterica serovar Typhimurium str. LT2 - NC_003197.2 (bases 1 to 4857450) extraction	189966	189966	189966	189966	1		T	SNP (transition)	C -> T
Salmonella enterica subsp. enterica serovar Typhimurium str. LT2 - NC_003197.2 (bases 1 to 4857450) extraction	199325	199325	199325	199325	1	STM0169	T	SNP (transition)	C -> T	gcd CDS	Substitution	429	G -> D	pyrroloquinoline quinone-dependent dehydrogenase	similar to E. coli glucose dehydrogenase (AAC73235.1); Blastp hit to AAC73235.1 (796 aa), 92% identity in aa 1 - 796
Salmonella enterica subsp. enterica serovar Typhimurium str. LT2 - NC_003197.2 (bases 1 to 4857450) extraction	202740	202740	202740	202740	1	STM0172	T	SNP (transition)	C -> T	yadG CDS	Substitution	187	T -> I	multidrug ABC transporter ATP-binding protein	similar to E. coli putative ATP-binding component of a transport system (AAC73238.1); Blastp hit to AAC73238.1 (308 aa), 95% identity in aa 1 - 308
Salmonella enterica subsp. enterica serovar Typhimurium str. LT2 - NC_003197.2 (bases 1 to 4857450) extraction	203622	203622	203622	203622	1	STM0173	T	SNP (transition)	C -> T	yadH CDS	None	173		ABC transporter permease	ABC superfamily (membrane); similar to E. coli orf,hypothetical protein (AAC73239.1); Blastp hit toAAC73239.1 (256 aa), 94% identity in aa 1 - 256
Salmonella enterica subsp. enterica serovar Typhimurium str. LT2 - NC_003197.2 (bases 1 to 4857450) extraction	207765	207765	207765	207765	1	STM0176	T	SNP (transition)	C -> T	stiB CDS	Substitution	191	A -> T	long polar fimbrial chaperone LpfB	similar to E. coli periplasmic chaperone, required for type 1 fimbriae (AAC77272.1); Blastp hit to AAC77272.1 (241 aa), 39% identity in aa 20 - 235
Salmonella enterica subsp. enterica serovar Typhimurium str. LT2 - NC_003197.2 (bases 1 to 4857450) extraction	209275	209275	209275	209275	1		T	SNP (transition)	C -> T
Salmonella enterica subsp. enterica serovar Typhimurium str. LT2 - NC_003197.2 (bases 1 to 4857450) extraction	212371	212371	212371	212371	1		T	SNP (transition)	C -> T
Salmonella enterica subsp. enterica serovar Typhimurium str. LT2 - NC_003197.2 (bases 1 to 4857450) extraction	212527	212527	212527	212527	1	STM0182	T	SNP (transition)	C -> T	panB CDS	Substitution	251	E -> K	3-methyl-2-oxobutanoate hydroxymethyltransferase	similar to E. coli 3-methyl-2-oxobutanoate hydroxymethyltransferase (AAC73245.1); Blastp hit to AAC73245.1 (264 aa), 92% identity in aa 1 - 264
Salmonella enterica subsp. enterica serovar Typhimurium str. LT2 - NC_003197.2 (bases 1 to 4857450) extraction	212780	212780	212780	212780	1	STM0182	T	SNP (transition)	C -> T	panB CDS	None	166		3-methyl-2-oxobutanoate hydroxymethyltransferase	similar to E. coli 3-methyl-2-oxobutanoate hydroxymethyltransferase (AAC73245.1); Blastp hit to AAC73245.1 (264 aa), 92% identity in aa 1 - 264
Salmonella enterica subsp. enterica serovar Typhimurium str. LT2 - NC_003197.2 (bases 1 to 4857450) extraction	215214	215214	215214	215214	1	STM0184	T	SNP (transition)	C -> T	pcnB CDS	Substitution	27	A -> T	polynucleotide adenylyltransferase	similar to E. coli poly(A) polymerase I (AAC73254.1); Blastp hit to AAC73254.1 (454 aa), 90% identity in aa 1 - 453
Salmonella enterica subsp. enterica serovar Typhimurium str. LT2 - NC_003197.2 (bases 1 to 4857450) extraction	219467	219467	219467	219467	1	STM0189	T	SNP (transition)	C -> T	hrpB CDS	Substitution	387	P -> S	ATP-dependent helicase	similar to E. coli helicase, ATP-dependent (AAC73259.1); Blastp hit to AAC73259.1 (824 aa), 84% identity in aa 1 - 824
Salmonella enterica subsp. enterica serovar Typhimurium str. LT2 - NC_003197.2 (bases 1 to 4857450) extraction	223938	223938	223938	223938	1	STM0191	T	SNP (transition)	C -> T	fhuA CDS	Substitution	67	A -> V	ferrichrome porin FhuA	similar to E. coli outer membrane protein receptor for ferrichrome, colicin M, and phages T1, T5, and phi80 (AAC73261.1); Blastp hit to AAC73261.1 (747 aa), 68% identity in aa 1 - 747
Salmonella enterica subsp. enterica serovar Typhimurium str. LT2 - NC_003197.2 (bases 1 to 4857450) extraction	224530	224530	224530	224530	1	STM0191	T	SNP (transition)	C -> T	fhuA CDS	None	264		ferrichrome porin FhuA	similar to E. coli outer membrane protein receptor for ferrichrome, colicin M, and phages T1, T5, and phi80 (AAC73261.1); Blastp hit to AAC73261.1 (747 aa), 68% identity in aa 1 - 747
Salmonella enterica subsp. enterica serovar Typhimurium str. LT2 - NC_003197.2 (bases 1 to 4857450) extraction	224699	224699	224699	224699	1	STM0191	T	SNP (transition)	C -> T	fhuA CDS	Substitution	321	H -> Y	ferrichrome porin FhuA	similar to E. coli outer membrane protein receptor for ferrichrome, colicin M, and phages T1, T5, and phi80 (AAC73261.1); Blastp hit to AAC73261.1 (747 aa), 68% identity in aa 1 - 747
Salmonella enterica subsp. enterica serovar Typhimurium str. LT2 - NC_003197.2 (bases 1 to 4857450) extraction	232821	232821	232821	232821	1	STM0196	T	SNP (transition)	C -> T	stfC CDS	None	506		outer membrane usher protein	outer membrane usher protein StfC (gi|3747030)
Salmonella enterica subsp. enterica serovar Typhimurium str. LT2 - NC_003197.2 (bases 1 to 4857450) extraction	232915	232915	232915	232915	1	STM0196	T	SNP (transition)	C -> T	stfC CDS	Truncation	538		outer membrane usher protein	outer membrane usher protein StfC (gi|3747030)
Salmonella enterica subsp. enterica serovar Typhimurium str. LT2 - NC_003197.2 (bases 1 to 4857450) extraction	234052	234052	234052	234052	1	STM0197	T	SNP (transition)	C -> T	stfD CDS	Substitution	25	A -> V	fimbrial protein	periplasmic fimbrial chaperone StfD (gi|3747031)
Salmonella enterica subsp. enterica serovar Typhimurium str. LT2 - NC_003197.2 (bases 1 to 4857450) extraction	239658	239658	239658	239658	1	STM0203	T	SNP (transition)	C -> T	yadQ CDS	None	333		chloride channel protein	similar to E. coli putative channel transporter (AAC73266.1); Blastp hit to AAC73266.1 (473 aa), 78% identity in aa 1 - 473
Salmonella enterica subsp. enterica serovar Typhimurium str. LT2 - NC_003197.2 (bases 1 to 4857450) extraction	248922	248922	248922	248922	1	STM0212	T	SNP (transition)	C -> T	MFS transporter CDS	Substitution	324	P -> L	MFS transporter	similar to E. coli putative transport protein, shikimate (AAC75045.1); Blastp hit to AAC75045.1 (438 aa), 40% identity in aa 13 - 435
Salmonella enterica subsp. enterica serovar Typhimurium str. LT2 - NC_003197.2 (bases 1 to 4857450) extraction	249346	249346	249346	249346	1	STM0213	T	SNP (transition)	C -> T	dapD CDS	Substitution	257	D -> N	2,3,4,5-tetrahydropyridine-2,6-dicarboxylate N-succinyltransferase	similar to E. coli 2,3,4,5-tetrahydropyridine-2-carboxylate N-succinyltransferase (AAC73277.1); Blastp hit to AAC73277.1 (274 aa), 97% identity in aa 1 - 274
Salmonella enterica subsp. enterica serovar Typhimurium str. LT2 - NC_003197.2 (bases 1 to 4857450) extraction	263794	263794	263794	263794	1	STM0224	T	SNP (transition)	C -> T	yaeT CDS	Substitution	472	S -> F	outer membrane protein assembly factor BamA	similar to E. coli orf, hypothetical protein (AAC73288.1); Blastp hit to AAC73288.1 (810 aa), 92% identity in aa 1 - 810
Salmonella enterica subsp. enterica serovar Typhimurium str. LT2 - NC_003197.2 (bases 1 to 4857450) extraction	264621	264621	264621	264621	1	STM0224	T	SNP (transition)	C -> T	yaeT CDS	Substitution	748	P -> S	outer membrane protein assembly factor BamA	similar to E. coli orf, hypothetical protein (AAC73288.1); Blastp hit to AAC73288.1 (810 aa), 92% identity in aa 1 - 810
Salmonella enterica subsp. enterica serovar Typhimurium - CP067397 (bases 1 to 4796208) extraction	289180	290721	289180	290721	1542	JJB81_01255	16S rRNA							16S ribosomal RNA	Derived by automated computational analysis using gene prediction method: cmsearch.
Salmonella enterica subsp. enterica serovar Typhimurium str. LT2 - NC_003197.2 (bases 1 to 4857450) extraction	289190	290733	289190	290733	1544	STM0249	rrsH rRNA							16S ribosomal RNA
Salmonella enterica subsp. enterica serovar Typhimurium str. LT2 - NC_003197.2 (bases 1 to 4857450) extraction	290718	290718	290718	290718	1		A	SNP (transversion)	C -> A
Salmonella enterica subsp. enterica serovar Typhimurium - CP067397 (bases 1 to 4796208) extraction	291235	294226	291235	294226	2992	JJB81_01270	23S rRNA							23S ribosomal RNA	Derived by automated computational analysis using gene prediction method: cmsearch.
Salmonella enterica subsp. enterica serovar Typhimurium str. LT2 - NC_003197.2 (bases 1 to 4857450) extraction	291245	294337	291245	294337	3093	STM0252	rrlH rRNA							23S ribosomal RNA
Salmonella enterica subsp. enterica serovar Typhimurium str. LT2 - NC_003197.2 (bases 1 to 4857450) extraction	291774	291888	291774	291889	115		CACAGGTTTACCTGTG	Deletion	CCCCACCACTAAGCCAGTGGTGAACTCCACATCCGCATCCTTTGCTGAGGATACGGTTAACGGAGCGAAAGCGACGTTCAACCGCAAAACAAGCAGAGGGGGCTTAGTGGTGGGG -> CACAGGTTTACCTGTG
Salmonella enterica subsp. enterica serovar Typhimurium str. LT2 - NC_003197.2 (bases 1 to 4857450) extraction	291948	291948	291948	291948	1		T	SNP (transversion)	A -> T
Salmonella enterica subsp. enterica serovar Typhimurium str. LT2 - NC_003197.2 (bases 1 to 4857450) extraction	293291	293291	293291	293291	1		T	SNP (transition)	C -> T
Salmonella enterica subsp. enterica serovar Typhimurium str. LT2 - NC_003197.2 (bases 1 to 4857450) extraction	294520	294641	294520	294641	122	STM0253	rrfH rRNA							5S ribosomal RNA
Salmonella enterica subsp. enterica serovar Typhimurium - CP067397 (bases 1 to 4796208) extraction	294423	294538	294423	294538	116	JJB81_01275	rrf rRNA							5S ribosomal RNA	Derived by automated computational analysis using gene prediction method: cmsearch.
Salmonella enterica subsp. enterica serovar Typhimurium str. LT2 - NC_003197.2 (bases 1 to 4857450) extraction	294722	294722	294722	294722	1		A	SNP (transition)	G -> A
Salmonella enterica subsp. enterica serovar Typhimurium str. LT2 - NC_003197.2 (bases 1 to 4857450) extraction	321375	321375	321375	321375	1	STM0282	A	SNP (transition)	G -> A	hypothetical protein CDS	None	88		hypothetical protein	similar to E. coli putative outer membrane protein (AAC76576.1); Blastp hit to AAC76576.1 (219 aa), 44% identity in aa 145 - 214
Salmonella enterica subsp. enterica serovar Typhimurium str. LT2 - NC_003197.2 (bases 1 to 4857450) extraction	329264	329264	329264	329264	1	STM0288	A	SNP (transition)	G -> A	putative cytoplasmic protein CDS	None	103		putative cytoplasmic protein
Salmonella enterica subsp. enterica serovar Typhimurium str. LT2 - NC_003197.2 (bases 1 to 4857450) extraction	335904	335904	335904	335904	1	STM0291	A	SNP (transition)	G -> A	putative RHS-family protein CDS	Substitution	1118	G -> D	putative RHS-family protein	similar to E. coli rhsD protein in rhs element (AAC73599.1); Blastp hit to AAC73599.1 (1426 aa), 27% identity in aa 315 - 985, 46% identity in aa 1151 - 1261, 25% identity in aa 297 - 788, 24% identity in aa 346 - 870, 22-1073758628dentity in aa 465 - 904, 26% identity in aa 317 - 724, 32-1073758654dentity in aa 4 - 143, 24% identity in aa 232 - 605, 21% identity in aa 562 - 970, 23% identity in …
Salmonella enterica subsp. enterica serovar Typhimurium str. LT2 - NC_003197.2 (bases 1 to 4857450) extraction	340797	340797	340797	340797	1		A	SNP (transition)	G -> A
Salmonella enterica subsp. enterica serovar Typhimurium str. LT2 - NC_003197.2 (bases 1 to 4857450) extraction	344444	344444	344444	344444	1	STM0301	A	SNP (transition)	G -> A	safC CDS	Substitution	293	G -> D	pilin outer membrane usher protein SafC	similar to E. coli putative outer membrane protein,export function (AAC73634.1); Blastp hit to AAC73634.1(867 aa), 34% identity in aa 35 - 862
Salmonella enterica subsp. enterica serovar Typhimurium str. LT2 - NC_003197.2 (bases 1 to 4857450) extraction	346275	346275	346275	346275	1	STM0302	A	SNP (transition)	G -> A	safD CDS	Truncation	59		pilin structural protein SafD
Salmonella enterica subsp. enterica serovar Typhimurium str. LT2 - NC_003197.2 (bases 1 to 4857450) extraction	366850	366850	366850	366850	1	STM0321	T	SNP (transition)	C -> T	proB CDS	Substitution	179	P -> S	glutamate 5-kinase	similar to E. coli gamma-glutamate kinase (AAC73346.1); Blastp hit to AAC73346.1 (367 aa), 96% identity in aa 1 - 367
Salmonella enterica subsp. enterica serovar Typhimurium str. LT2 - NC_003197.2 (bases 1 to 4857450) extraction	369749	369749	369749	369749	1	STM0325	T	SNP (transition)	C -> T	transposase CDS	Substitution	84	V -> M	transposase	similar to E. coli IS3 putative transposase (AAC75150.1); Blastp hit to AAC75150.1 (288 aa), 83% identity in aa 30 - 267
Salmonella enterica subsp. enterica serovar Typhimurium str. LT2 - NC_003197.2 (bases 1 to 4857450) extraction	381723	381723	381723	381723	1	STM0338	T	SNP (transition)	C -> T	stbC CDS	None	625		fimbrial assembly protein	similar to E. coli outer membrane protein; export and assembly of type 1 fimbriae, interrupted (AAC77273.1); Blastp hit to AAC77273.1 (878 aa), 30% identity in aa 30 - 870
Salmonella enterica subsp. enterica serovar Typhimurium str. LT2 - NC_003197.2 (bases 1 to 4857450) extraction	382250	382250	382250	382250	1	STM0338	T	SNP (transition)	C -> T	stbC CDS	Substitution	450	A -> T	fimbrial assembly protein	similar to E. coli outer membrane protein; export and assembly of type 1 fimbriae, interrupted (AAC77273.1); Blastp hit to AAC77273.1 (878 aa), 30% identity in aa 30 - 870
Salmonella enterica subsp. enterica serovar Typhimurium str. LT2 - NC_003197.2 (bases 1 to 4857450) extraction	382862	382862	382862	382862	1	STM0338	T	SNP (transition)	C -> T	stbC CDS	Substitution	246	D -> N	fimbrial assembly protein	similar to E. coli outer membrane protein; export and assembly of type 1 fimbriae, interrupted (AAC77273.1); Blastp hit to AAC77273.1 (878 aa), 30% identity in aa 30 - 870
Salmonella enterica subsp. enterica serovar Typhimurium str. LT2 - NC_003197.2 (bases 1 to 4857450) extraction	387506	387506	387506	387506	1	STM0343	A	SNP (transition)	G -> A	putative diguanylate cyclase/phosphodiesterase domain 1 CDS	Substitution	133	A -> T	putative diguanylate cyclase/phosphodiesterase domain 1	similar to E. coli orf, hypothetical protein (AAC75237.1); Blastp hit to AAC75237.1 (518 aa), 31% identity in aa 10 - 512
Salmonella enterica subsp. enterica serovar Typhimurium str. LT2 - NC_003197.2 (bases 1 to 4857450) extraction	388543	388543	388543	388543	1	STM0343	A	SNP (transition)	G -> A	putative diguanylate cyclase/phosphodiesterase domain 1 CDS	None	478		putative diguanylate cyclase/phosphodiesterase domain 1	similar to E. coli orf, hypothetical protein (AAC75237.1); Blastp hit to AAC75237.1 (518 aa), 31% identity in aa 10 - 512
Salmonella enterica subsp. enterica serovar Typhimurium str. LT2 - NC_003197.2 (bases 1 to 4857450) extraction	405692	405692	405692	405692	1	STM0358	A	SNP (transition)	G -> A	res CDS	None	131		DNA restriction (DNA helicase)	type iii restriction-modification system stylti enzyme res (SW:T3RE_SALTY)
Salmonella enterica subsp. enterica serovar Typhimurium str. LT2 - NC_003197.2 (bases 1 to 4857450) extraction	408048	408048	408048	408048	1	STM0358	A	SNP (transition)	G -> A	res CDS	Substitution	917	D -> N	DNA restriction (DNA helicase)	type iii restriction-modification system stylti enzyme res (SW:T3RE_SALTY)
Salmonella enterica subsp. enterica serovar Typhimurium str. LT2 - NC_003197.2 (bases 1 to 4857450) extraction	408971	408971	408971	408971	1	STM0360	A	SNP (transition)	G -> A	cytochrome ubiquinol oxidase subunit I CDS	Substitution	69	V -> I	cytochrome ubiquinol oxidase subunit I	similar to E. coli probable third cytochrome oxidase, subunit I (AAC74063.1); Blastp hit to AAC74063.1 (514 aa), 38% identity in aa 2 - 316, 38% identity in aa 381 - 512
Salmonella enterica subsp. enterica serovar Typhimurium str. LT2 - NC_003197.2 (bases 1 to 4857450) extraction	413508	413508	413508	413508	1	STM0364	A	SNP (transition)	G -> A	foxA CDS	Substitution	282	G -> D	ferrioxamine receptor	ferrioxamine B receptor precursor. (SW:FOXA_SALTY)
Salmonella enterica subsp. enterica serovar Typhimurium str. LT2 - NC_003197.2 (bases 1 to 4857450) extraction	415330	415330	415330	415330	1	STM0365	A	SNP (transition)	G -> A	yahN CDS	Substitution	39	A -> V	hypothetical protein	similar to E. coli putative cytochrome subunit of dehydrogenase (AAC73431.1); Blastp hit to AAC73431.1 (223 aa), 86% identity in aa 14 - 223
Salmonella enterica subsp. enterica serovar Typhimurium str. LT2 - NC_003197.2 (bases 1 to 4857450) extraction	415378	415378	415378	415378	1	STM0365	A	SNP (transition)	G -> A	yahN CDS	Substitution	23	A -> V	hypothetical protein	similar to E. coli putative cytochrome subunit of dehydrogenase (AAC73431.1); Blastp hit to AAC73431.1 (223 aa), 86% identity in aa 14 - 223
Salmonella enterica subsp. enterica serovar Typhimurium str. LT2 - NC_003197.2 (bases 1 to 4857450) extraction	421921	421921	421921	421921	1	STM0371	T	SNP (transition)	C -> T	prpE CDS	Substitution	78	T -> I	propionate--CoA ligase	PRPE protein. (SW:PRPE_SALTY)
Salmonella enterica subsp. enterica serovar Typhimurium str. LT2 - NC_003197.2 (bases 1 to 4857450) extraction	428476	428476	428476	428476	1	STM0374	T	SNP (transition)	C -> T	yaiV CDS	Substitution	97	L -> F	transcriptional regulator	similar to E. coli orf, hypothetical protein (AAC73478.1); Blastp hit to AAC73478.1 (222 aa), 71% identity in aa 16 - 222
Salmonella enterica subsp. enterica serovar Typhimurium str. LT2 - NC_003197.2 (bases 1 to 4857450) extraction	433426	433426	433426	433426	1	STM0379	A	SNP (transition)	G -> A	yaiZ CDS	Substitution	42	G -> S	hypothetical protein	similar to E. coli orf, hypothetical protein (AAC73483.1); Blastp hit to AAC73483.1 (114 aa), 84% identity in aa 45 - 114
Salmonella enterica subsp. enterica serovar Typhimurium str. LT2 - NC_003197.2 (bases 1 to 4857450) extraction	433681	433681	433681	433681	1	STM0380	A	SNP (transition)	G -> A	ddlA CDS	Substitution	320	P -> S	D-alanine--D-alanine ligase A	D-alanine--D-alanine ligase A. (SW:DDLA_SALTY)
Salmonella enterica subsp. enterica serovar Typhimurium str. LT2 - NC_003197.2 (bases 1 to 4857450) extraction	437172	437172	437172	437172	1	STM0383	A	SNP (transition)	G -> A	yaiB CDS	Substitution	25	V -> I	putative cytoplasmic protein	similar to E. coli orf, hypothetical protein (AAC73485.1); Blastp hit to AAC73485.1 (86 aa), 85% identity in aa 1 - 85
Salmonella enterica subsp. enterica serovar Typhimurium str. LT2 - NC_003197.2 (bases 1 to 4857450) extraction	439750	439750	439750	439750	1	STM0386	A	SNP (transition)	G -> A	proC CDS	Substitution	106	A -> V	pyrroline-5-carboxylate reductase	similar to E. coli pyrroline-5-carboxylate reductase (AAC73489.1); Blastp hit to AAC73489.1 (269 aa), 95% identity in aa 1 - 269
Salmonella enterica subsp. enterica serovar Typhimurium str. LT2 - NC_003197.2 (bases 1 to 4857450) extraction	446472	446472	446472	446472	1	STM0395	A	SNP (transition)	G -> A	sbcC CDS	Substitution	971	H -> Y	exonuclease subunit SbcC	similar to E. coli ATP-dependent dsDNA exonuclease (AAC73500.1); Blastp hit to AAC73500.1 (1048 aa), 70% identity in aa 1 - 1048
Salmonella enterica subsp. enterica serovar Typhimurium str. LT2 - NC_003197.2 (bases 1 to 4857450) extraction	448200	448200	448200	448200	1	STM0395	A	SNP (transition)	G -> A	sbcC CDS	Truncation	395		exonuclease subunit SbcC	similar to E. coli ATP-dependent dsDNA exonuclease (AAC73500.1); Blastp hit to AAC73500.1 (1048 aa), 70% identity in aa 1 - 1048
Salmonella enterica subsp. enterica serovar Typhimurium str. LT2 - NC_003197.2 (bases 1 to 4857450) extraction	448587	448587	448587	448587	1	STM0395	A	SNP (transition)	G -> A	sbcC CDS	None	266		exonuclease subunit SbcC	similar to E. coli ATP-dependent dsDNA exonuclease (AAC73500.1); Blastp hit to AAC73500.1 (1048 aa), 70% identity in aa 1 - 1048
Salmonella enterica subsp. enterica serovar Typhimurium str. LT2 - NC_003197.2 (bases 1 to 4857450) extraction	449163	449163	449163	449163	1	STM0395	A	SNP (transition)	G -> A	sbcC CDS	Substitution	74	R -> C	exonuclease subunit SbcC	similar to E. coli ATP-dependent dsDNA exonuclease (AAC73500.1); Blastp hit to AAC73500.1 (1048 aa), 70% identity in aa 1 - 1048
Salmonella enterica subsp. enterica serovar Typhimurium str. LT2 - NC_003197.2 (bases 1 to 4857450) extraction	449882	449882	449882	449882	1	STM0396	A	SNP (transition)	G -> A	sbcD CDS	Substitution	234	H -> Y	exonuclease subunit SbcD	similar to E. coli ATP-dependent dsDNA exonuclease (AAC73501.1); Blastp hit to AAC73501.1 (400 aa), 84% identity in aa 1 - 400
Salmonella enterica subsp. enterica serovar Typhimurium str. LT2 - NC_003197.2 (bases 1 to 4857450) extraction	454995	454995	454995	454995	1	STM0400	A	SNP (transition)	G -> A	proY CDS	Substitution	115	G -> R	proline-specific permease ProY	proline-specific permease PROY. (SW:PROY_SALTY)
Salmonella enterica subsp. enterica serovar Typhimurium str. LT2 - NC_003197.2 (bases 1 to 4857450) extraction	455452	455452	455452	455452	1	STM0400	A	SNP (transition)	G -> A	proY CDS	Substitution	267	G -> D	proline-specific permease ProY	proline-specific permease PROY. (SW:PROY_SALTY)
Salmonella enterica subsp. enterica serovar Typhimurium str. LT2 - NC_003197.2 (bases 1 to 4857450) extraction	460491	460491	460491	460491	1	STM0404	A	SNP (transition)	G -> A	queA CDS	Substitution	311	V -> I	S-adenosylmethionine-tRNA ribosyltransferase-isomerase	similar to E. coli synthesis of queuine in tRNA; probably S-adenosylmethionine:tRNA ribosyltransferase-isomerase (AAC73508.1); Blastp hit to AAC73508.1 (356 aa), 94% identity in aa 1 - 353
Salmonella enterica subsp. enterica serovar Typhimurium str. LT2 - NC_003197.2 (bases 1 to 4857450) extraction	469153	469153	469153	469153	1	STM0414	A	SNP (transition)	G -> A	yajI CDS	Substitution	30	H -> Y	hypothetical protein	similar to E. coli orf, hypothetical protein (AAC73515.1); Blastp hit to AAC73515.1 (199 aa), 73% identity in aa 21 - 199
Salmonella enterica subsp. enterica serovar Typhimurium str. LT2 - NC_003197.2 (bases 1 to 4857450) extraction	471693	471693	471693	471693	1	STM0418	A	SNP (transition)	G -> A	nusB CDS	Substitution	56	A -> T	N utilization substance protein B	similar to E. coli transcription termination; L factor (AAC73519.1); Blastp hit to AAC73519.1 (139 aa), 96% identity in aa 1 - 139
Salmonella enterica subsp. enterica serovar Typhimurium str. LT2 - NC_003197.2 (bases 1 to 4857450) extraction	474045	474045	474045	474045	1	STM0421	A	SNP (transition)	G -> A	yajO CDS	Substitution	177	A -> V	oxidoreductase	similar to E. coli putative NAD(P)H-dependent xylose reductase (AAC73522.1); Blastp hit to AAC73522.1 (348 aa), 92% identity in aa 25 - 348
Salmonella enterica subsp. enterica serovar Typhimurium str. LT2 - NC_003197.2 (bases 1 to 4857450) extraction	475980	475980	475980	475980	1	STM0422	A	SNP (transition)	G -> A	dxs CDS	Substitution	172	P -> S	1-deoxy-D-xylulose-5-phosphate synthase	similar to E. coli 1-deoxyxylulose-5-phosphate synthase; flavoprotein (AAC73523.1); Blastp hit to AAC73523.1 (620 aa), 96% identity in aa 1 - 620
Salmonella enterica subsp. enterica serovar Typhimurium str. LT2 - NC_003197.2 (bases 1 to 4857450) extraction	489152	489152	489152	489152	1	STM0436	A	SNP (transition)	G -> A	yajR CDS	Substitution	185	T -> I	putative MFS family transporter	similar to E. coli putative transport protein (AAC73530.1); Blastp hit to AAC73530.1 (456 aa), 89% identity in aa 8 - 453
Salmonella enterica subsp. enterica serovar Typhimurium str. LT2 - NC_003197.2 (bases 1 to 4857450) extraction	490022	490022	490022	490022	1	STM0436A	A	SNP (transition)	G -> A	IS903 transposase CDS	None	30		IS903 transposase
Salmonella enterica subsp. enterica serovar Typhimurium str. LT2 - NC_003197.2 (bases 1 to 4857450) extraction	502201	502201	502201	502201	1	STM0447	A	SNP (transition)	G -> A	tig CDS	Substitution	179	G -> D	trigger factor	trigger factor; a molecular chaperone involved in cell division; similar to E. coli trigger factor; a molecular chaperone involved in cell division (AAC73539.1); Blastp hit to AAC73539.1 (432 aa), 95% identity in aa 1 - 432
Salmonella enterica subsp. enterica serovar Typhimurium str. LT2 - NC_003197.2 (bases 1 to 4857450) extraction	509614	509614	509614	509614	1	STM0452	A	SNP (transition)	G -> A	cypD CDS	Substitution	316	G -> S	peptidylprolyl isomerase	similar to E. coli putative protease maturation protein (AAC73544.1); Blastp hit to AAC73544.1 (623 aa), 88% identity in aa 1 - 623
Salmonella enterica subsp. enterica serovar Typhimurium str. LT2 - NC_003197.2 (bases 1 to 4857450) extraction	518018	518018	518018	518018	1	STM0460	A	SNP (transition)	G -> A	mdlA CDS	None	417		multidrug ABC transporter permease/ATP-binding protein	similar to E. coli ATP-binding component of a transport system (AAC73551.1); Blastp hit to AAC73551.1 (590 aa), 88% identity in aa 1 - 590
Salmonella enterica subsp. enterica serovar Typhimurium str. LT2 - NC_003197.2 (bases 1 to 4857450) extraction	524912	524912	524912	524912	1	STM0468	A	SNP (transition)	G -> A	ylaB CDS	Substitution	407	P -> S	hypothetical protein	similar to E. coli orf, hypothetical protein (AAC73559.1); Blastp hit to AAC73559.1 (518 aa), 67% identity in aa 3 - 518
Salmonella enterica subsp. enterica serovar Typhimurium str. LT2 - NC_003197.2 (bases 1 to 4857450) extraction	527410	527410	527410	527410	1	STM0472		Deletion (tandem repeat)	(T)6 -> (T)5	maa CDS	Frame Shift	182		maltose O-acetyltransferase	similar to E. coli putative transferase (AAC73561.1); Blastp hit to AAC73561.1 (183 aa), 79% identity in aa 1 - 183
Salmonella enterica subsp. enterica serovar Typhimurium - CP067397 (bases 1 to 4796208) extraction	542071	542135	542071	542135	65	JJB81_02450	dnaX misc								DnaX frameshifting element; Derived by automated computational analysis using gene prediction method: cmsearch.
Salmonella enterica subsp. enterica serovar Typhimurium str. LT2 - NC_003197.2 (bases 1 to 4857450) extraction	608859	608859	608859	608859	1	STM0547	C	SNP (transversion)	G -> C	fimH CDS	Substitution	61	G -> A	fimbrial adhesin FimH	FIMH protein precursor. (SW:FIMH_SALTY)
Salmonella enterica subsp. enterica serovar Typhimurium str. LT2 - NC_003197.2 (bases 1 to 4857450) extraction	621426	621426	621426	621426	1	STM0564	T	SNP (transition)	C -> T	pyridine nucleotide-disulfide oxidoreductase CDS	Substitution	366	P -> S	pyridine nucleotide-disulfide oxidoreductase	similar to E. coli putative oxidoreductase (AAC73407.1); Blastp hit to AAC73407.1 (450 aa), 74% identity in aa 10 - 450
Salmonella enterica subsp. enterica serovar Typhimurium str. LT2 - NC_003197.2 (bases 1 to 4857450) extraction	678935	678935	678935	678935	1	STM0615	A	SNP (transition)	G -> A	ybdR CDS	Substitution	304	V -> I	glutathione-dependent formaldehyde dehydrogenase	similar to E. coli putative oxidoreductase (AAC73709.1); Blastp hit to AAC73709.1 (412 aa), 91% identity in aa 1 - 412
Salmonella enterica subsp. enterica serovar Typhimurium str. LT2 - NC_003197.2 (bases 1 to 4857450) extraction	975488	975488	975488	975488	1		T	SNP (transition)	C -> T
Salmonella enterica subsp. enterica serovar Typhimurium str. LT2 - NC_003197.2 (bases 1 to 4857450) extraction	983027	983027	983027	983027	1	STM0911	T	SNP (transition)	C -> T	Fels-1 prophage protein CDS	None	383		Fels-1 prophage protein
Salmonella enterica subsp. enterica serovar Typhimurium str. LT2 - NC_003197.2 (bases 1 to 4857450) extraction	993549	993549	993549	993549	1	STM0921	T	SNP (transition)	C -> T	putative Fels-1 prophage minor tail protein CDS	Substitution	219	P -> S	putative Fels-1 prophage minor tail protein
Salmonella enterica subsp. enterica serovar Typhimurium str. LT2 - NC_003197.2 (bases 1 to 4857450) extraction	994414	994414	994414	994414	1	STM0923	T	SNP (transition)	C -> T	putative Fels-1 prophage tail assembly protein CDS	Truncation	61		putative Fels-1 prophage tail assembly protein
Salmonella enterica subsp. enterica serovar Typhimurium str. LT2 - NC_003197.2 (bases 1 to 4857450) extraction	1025026	1025734	1025026	1025734	709		mobile element
Salmonella enterica subsp. enterica serovar Typhimurium str. LT2 - NC_003197.2 (bases 1 to 4857450) extraction	1104402	1104402	1104402	1104402	1	STM1010	A	SNP (transversion)	T -> A	Gifsy-2 prophage protein CDS	Substitution	57	S -> C	Gifsy-2 prophage protein	hypothetical protein 4 (gi|7467264)
Salmonella enterica subsp. enterica serovar Typhimurium str. LT2 - NC_003197.2 (bases 1 to 4857450) extraction	1104435	1104437	1104435	1104438	3	STM1010	GAATCACAGTGGTTTCGCCAGTTGAATTTGAGTGAATAACGCCTGAGACTTTCT	Insertion	GAT -> GAATCACAGTGGTTTCGCCAGTTGAATTTGAGTGAATAACGCCTGAGACTTTCT	Gifsy-2 prophage protein CDS	Insertion	45	NL -> KKVSGVIHSNSTGETTVIL	Gifsy-2 prophage protein	hypothetical protein 4 (gi|7467264)
Salmonella enterica subsp. enterica serovar Typhimurium str. LT2 - NC_003197.2 (bases 1 to 4857450) extraction	1104537	1104537	1104537	1104537	1	STM1010	G	SNP (transversion)	T -> G	Gifsy-2 prophage protein CDS	Substitution	12	I -> L	Gifsy-2 prophage protein	hypothetical protein 4 (gi|7467264)
Salmonella enterica subsp. enterica serovar Typhimurium str. LT2 - NC_003197.2 (bases 1 to 4857450) extraction	1104584	1104584	1104584	1104584	1		A	SNP (transversion)	T -> A
Salmonella enterica subsp. enterica serovar Typhimurium str. LT2 - NC_003197.2 (bases 1 to 4857450) extraction	1104625	1104625	1104625	1104625	1		G	SNP (transition)	A -> G
Salmonella enterica subsp. enterica serovar Typhimurium str. LT2 - NC_003197.2 (bases 1 to 4857450) extraction	1104657	1104657	1104657	1104657	1		G	SNP (transversion)	T -> G
Salmonella enterica subsp. enterica serovar Typhimurium str. LT2 - NC_003197.2 (bases 1 to 4857450) extraction	1104677	1104677	1104677	1104677	1		A	SNP (transversion)	C -> A
Salmonella enterica subsp. enterica serovar Typhimurium str. LT2 - NC_003197.2 (bases 1 to 4857450) extraction	1104688	1104688	1104688	1104688	1		G	SNP (transversion)	T -> G
Salmonella enterica subsp. enterica serovar Typhimurium str. LT2 - NC_003197.2 (bases 1 to 4857450) extraction	1104821	1104821	1104821	1104821	1	STM1011	G	SNP (transition)	A -> G	Gifsy-2 prophage protein CDS	None	61		Gifsy-2 prophage protein	hypothetical protein 2 (gi|7467263)
Salmonella enterica subsp. enterica serovar Typhimurium str. LT2 - NC_003197.2 (bases 1 to 4857450) extraction	1104840	1104840	1104840	1104840	1	STM1011	T	SNP (transition)	C -> T	Gifsy-2 prophage protein CDS	Substitution	55	R -> K	Gifsy-2 prophage protein	hypothetical protein 2 (gi|7467263)
Salmonella enterica subsp. enterica serovar Typhimurium str. LT2 - NC_003197.2 (bases 1 to 4857450) extraction	1110863	1110863	1110863	1110863	1	STM1021	T	SNP (transition)	C -> T	Gifsy-2 prophage protein CDS	None	32		Gifsy-2 prophage protein
Salmonella enterica subsp. enterica serovar Typhimurium str. LT2 - NC_003197.2 (bases 1 to 4857450) extraction	1110887	1110887	1110887	1110887	1	STM1021	A	SNP (transition)	G -> A	Gifsy-2 prophage protein CDS	None	40		Gifsy-2 prophage protein
Salmonella enterica subsp. enterica serovar Typhimurium str. LT2 - NC_003197.2 (bases 1 to 4857450) extraction	1111001	1111001	1111001	1111001	1	STM1021	G	SNP (transition)	A -> G	Gifsy-2 prophage protein CDS	None	78		Gifsy-2 prophage protein
Salmonella enterica subsp. enterica serovar Typhimurium str. LT2 - NC_003197.2 (bases 1 to 4857450) extraction	1111046	1111046	1111046	1111046	1	STM1021	T	SNP (transition)	C -> T	Gifsy-2 prophage protein CDS	None	93		Gifsy-2 prophage protein
Salmonella enterica subsp. enterica serovar Typhimurium str. LT2 - NC_003197.2 (bases 1 to 4857450) extraction	1111100	1111100	1111100	1111100	1	STM1021	G	SNP (transition)	A -> G	Gifsy-2 prophage protein CDS	None	111		Gifsy-2 prophage protein
Salmonella enterica subsp. enterica serovar Typhimurium str. LT2 - NC_003197.2 (bases 1 to 4857450) extraction	1111157	1111157	1111157	1111157	1	STM1021	T	SNP (transition)	C -> T	Gifsy-2 prophage protein CDS	None	130		Gifsy-2 prophage protein
Salmonella enterica subsp. enterica serovar Typhimurium str. LT2 - NC_003197.2 (bases 1 to 4857450) extraction	1111192	1111192	1111192	1111192	1	STM1021	G	SNP (transition)	A -> G	Gifsy-2 prophage protein CDS	Substitution	142	Y -> C	Gifsy-2 prophage protein
Salmonella enterica subsp. enterica serovar Typhimurium str. LT2 - NC_003197.2 (bases 1 to 4857450) extraction	1111230	1111230	1111230	1111230	1	STM1021	A	SNP (transition)	G -> A	Gifsy-2 prophage protein CDS	Substitution	155	A -> T	Gifsy-2 prophage protein
Salmonella enterica subsp. enterica serovar Typhimurium str. LT2 - NC_003197.2 (bases 1 to 4857450) extraction	1111253	1111253	1111253	1111253	1	STM1021	T	SNP (transversion)	G -> T	Gifsy-2 prophage protein CDS	None	162		Gifsy-2 prophage protein
Salmonella enterica subsp. enterica serovar Typhimurium str. LT2 - NC_003197.2 (bases 1 to 4857450) extraction	1206231	1206231	1206231	1206231	1	STM1121	A	SNP (transition)	G -> A	ymdF CDS	Substitution	14	D -> N	stress-induced protein	similar to E. coli orf, hypothetical protein (AAC74341.1); Blastp hit to AAC74341.1 (78 aa), 87% identity in aa 20 - 73
Salmonella enterica subsp. enterica serovar Typhimurium str. LT2 - NC_003197.2 (bases 1 to 4857450) extraction	1210504	1210504	1210504	1210504	1	STM1124	T	SNP (transition)	C -> T	putA CDS	None	348		trifunctional transcriptional regulator/proline dehydrogenase/L-glutamate gamma-semialdehyde dehydrogenase	PUTA protein (SW:PUTA_SALTY); bifunctional in plasma membrane proline dehydrogenase and pyrroline-5-carboxylate dehydrogenase OR in cytoplasm a transcriptional repressor
Salmonella enterica subsp. enterica serovar Typhimurium str. LT2 - NC_003197.2 (bases 1 to 4857450) extraction	1211497	1211497	1211497	1211497	1	STM1124	T	SNP (transition)	C -> T	putA CDS	None	17		trifunctional transcriptional regulator/proline dehydrogenase/L-glutamate gamma-semialdehyde dehydrogenase	PUTA protein (SW:PUTA_SALTY); bifunctional in plasma membrane proline dehydrogenase and pyrroline-5-carboxylate dehydrogenase OR in cytoplasm a transcriptional repressor
Salmonella enterica subsp. enterica serovar Typhimurium str. LT2 - NC_003197.2 (bases 1 to 4857450) extraction	1224372	1224372	1224372	1224372	1			Deletion (tandem repeat)	(G)7 -> (G)6
Salmonella enterica subsp. enterica serovar Typhimurium str. LT2 - NC_003197.2 (bases 1 to 4857450) extraction	1232990	1232990	1232990	1232990	1			Deletion (tandem repeat)	(G)10 -> (G)9
Salmonella enterica subsp. enterica serovar Typhimurium str. LT2 - NC_003197.2 (bases 1 to 4857450) extraction	1288762	1288762	1288762	1288762	1	STM1204	A	SNP (transition)	G -> A	fhuE CDS	None	430		ferric-rhodotorulic acid/ferric-coprogen receptor FhuE	Fe(III)-ferrioxamine B and Fe(III)-rhodotrulic aciduptake; similar to E. coli outer membrane receptor forferric iron uptake (AAC74186.1); Blastp hit to AAC74186.1(729 aa), 81% identity in aa 5 - 729
Salmonella enterica subsp. enterica serovar Typhimurium str. LT2 - NC_003197.2 (bases 1 to 4857450) extraction	1291998	1291998	1291998	1291998	1	STM1208	A	SNP (transition)	G -> A	ycfN CDS	None	79		thiamine kinase	similar to E. coli putative beta-glucosidase (AAC74190.1); Blastp hit to AAC74190.1 (274 aa), 67% identity in aa 5 - 273
Salmonella enterica subsp. enterica serovar Typhimurium str. LT2 - NC_003197.2 (bases 1 to 4857450) extraction	1294156	1294156	1294156	1294156	1	STM1210	A	SNP (transition)	G -> A	ycfP CDS	None	170		hypothetical protein	similar to E. coli orf, hypothetical protein (AAC74192.1); Blastp hit to AAC74192.1 (199 aa), 94% identity in aa 20 - 199
Salmonella enterica subsp. enterica serovar Typhimurium str. LT2 - NC_003197.2 (bases 1 to 4857450) extraction	1397097	1397099	1397097	1397100	3		TTTGTCTATGGAAAACCCCCAGCTAGGCTGGGGGTTCCGGAAAGCTTTCAGCTTTAAGCCAGTTATTAAAACCCCTTTTGATTTGTTAAAACATCTTGCGGTCTGGCAACTGCAAAAGTTCAACAAGAAATCAAAAGGGGGTCCCAATGGGGGACGAAAAGAGCTTAGCGCACACCCGATGGAACTGTAAATATCACATAGTTTTCGCGCCCAAATACCGAAGACAAGCGTTCTATGGAGAGAAGCGTAGGGCAGTAGGCAGCATATTAAGAAAATTGTGTGAATGGAAAAACGTACGAATTCTGGAAGCAGAATGTTGTGCAGATCATATTCACATGCTTCTGGAGATCCCGCCGAAGATGAGTGTGTCGAGTTTCATGGGATATCTGAAGGGTAAAA…	Insertion	TTT -> TTTGTCTATGGAAAACCCCCAGCTAGGCTGGGGGTTCCGGAAAGCTTTCAGCTTTAAGCCAGTTATTAAAACCCCTTTTGATTTGTTAAAACATCTTGCGGTCTGGCAACTGCAAAAGTTCAACAAGAAATCAAAAGGGGGTCCCAATGGGGGACGAAAAGAGCTTAGCGCACACCCGATGGAACTGTAAATATCACATAGTTTTCGCGCCCAAATACCGAAGACAAGCGTTCTATGGAGAGAAGCGTAGGGCAGTAGGCAGCATATTAAGAAAATTGTGTGAATGGAAAAACGTACGAATTCTGGAAGCAGAATGTTGTGCAGATCATATTCACATGCTTCTGGAGATCCCGCCGAAGATGAGTGTGTCGAGTTTCATGGGATATCTGAAG…
Salmonella enterica subsp. enterica serovar Typhimurium - CP067397 (bases 1 to 4796208) extraction	1416143	1416266	1416143	1416266	124		misc								Phe leader region; Derived by automated computational analysis using gene prediction method: cmsearch.
Salmonella enterica subsp. enterica serovar Typhimurium str. LT2 - NC_003197.2 (bases 1 to 4857450) extraction	1493916	1493916	1493916	1493916	1	STM1414	T	SNP (transition)	C -> T	ssaV CDS	None	90		EscV/YscV/HrcV family type III secretion system export apparatus protein	homology with the LcrD family of proteins; secretion system apparatus protein SSAV. (SW:SSAV_SALTY)
Salmonella enterica subsp. enterica serovar Typhimurium str. LT2 - NC_003197.2 (bases 1 to 4857450) extraction	1496125	1496125	1496125	1496125	1	STM1415	T	SNP (transition)	C -> T	ssaN CDS	None	148		EscN/YscN/HrcN family type III secretion system ATPase	homology with the YscN family of proteins; probablesecretion system apparatus ATP synthase SSAN.(SW:SSAN_SALTY)
Salmonella enterica subsp. enterica serovar Typhimurium str. LT2 - NC_003197.2 (bases 1 to 4857450) extraction	1502909	1502909	1502909	1502909	1	STM1425	T	SNP (transition)	C -> T	ydhE CDS	Substitution	140	G -> R	MATE family efflux transporter	similar to E. coli putative transport protein (AAC74735.1); Blastp hit to AAC74735.1 (457 aa), 92% identity in aa 1 - 457
Salmonella enterica subsp. enterica serovar Typhimurium str. LT2 - NC_003197.2 (bases 1 to 4857450) extraction	1537492	1537492	1537492	1537492	1	STM1463	T	SNP (transition)	C -> T	add CDS	Substitution	333	A -> T	adenosine deaminase	similar to E. coli adenosine deaminase (AAC74695.1); Blastp hit to AAC74695.1 (333 aa), 90% identity in aa 1 - 331
Salmonella enterica subsp. enterica serovar Typhimurium str. LT2 - NC_003197.2 (bases 1 to 4857450) extraction	1538149	1538149	1538149	1538149	1	STM1463	T	SNP (transition)	C -> T	add CDS	Substitution	114	G -> S	adenosine deaminase	similar to E. coli adenosine deaminase (AAC74695.1); Blastp hit to AAC74695.1 (333 aa), 90% identity in aa 1 - 331
Salmonella enterica subsp. enterica serovar Typhimurium str. LT2 - NC_003197.2 (bases 1 to 4857450) extraction	1552265	1552265	1552265	1552265	1	STM1476	T	SNP (transition)	C -> T	ydgC CDS	Substitution	43	H -> Y	hypothetical protein	similar to E. coli orf, hypothetical protein (AAC74679.1); Blastp hit to AAC74679.1 (111 aa), 81% identity in aa 1 - 111
Salmonella enterica subsp. enterica serovar Typhimurium str. LT2 - NC_003197.2 (bases 1 to 4857450) extraction	1553006	1553006	1553006	1553006	1	STM1477	T	SNP (transition)	C -> T	ydgI CDS	Substitution	305	A -> T	putative amino acid transporter	similar to E. coli putative arginine/ornithine antiporter (AAC74677.1); Blastp hit to AAC74677.1 (460 aa), 92% identity in aa 1 - 460
Salmonella enterica subsp. enterica serovar Typhimurium str. LT2 - NC_003197.2 (bases 1 to 4857450) extraction	1555071	1555071	1555071	1555071	1	STM1478	T	SNP (transition)	C -> T	ydgH CDS	Substitution	31	A -> T	hypothetical protein	similar to E. coli orf, hypothetical protein (AAC74676.1); Blastp hit to AAC74676.1 (314 aa), 90% identity in aa 1 - 314
Salmonella enterica subsp. enterica serovar Typhimurium str. LT2 - NC_003197.2 (bases 1 to 4857450) extraction	1568279	1568279	1568279	1568279	1	STM1490	A	SNP (transition)	G -> A	voltage-gated ClC-type chloride channel ClcB CDS	None	34		voltage-gated ClC-type chloride channel ClcB	similar to E. coli putative chloride channel (AAC74664.1); Blastp hit to AAC74664.1 (438 aa), 78% identity in aa 9 - 437
Salmonella enterica subsp. enterica serovar Typhimurium str. LT2 - NC_003197.2 (bases 1 to 4857450) extraction	1568360	1568360	1568360	1568360	1	STM1490	A	SNP (transition)	G -> A	voltage-gated ClC-type chloride channel ClcB CDS	None	7		voltage-gated ClC-type chloride channel ClcB	similar to E. coli putative chloride channel (AAC74664.1); Blastp hit to AAC74664.1 (438 aa), 78% identity in aa 9 - 437
Salmonella enterica subsp. enterica serovar Typhimurium str. LT2 - NC_003197.2 (bases 1 to 4857450) extraction	1570030	1570030	1570030	1570030	1	STM1492	A	SNP (transition)	G -> A	choline ABC transporter permease CDS	None	94		choline ABC transporter permease	inner membrane component; similar to E. coli putative transport system permease protein (AAC75189.1); Blastp hit to AAC75189.1 (243 aa), 36% identity in aa 47 - 239
Salmonella enterica subsp. enterica serovar Typhimurium str. LT2 - NC_003197.2 (bases 1 to 4857450) extraction	1580750	1580750	1580750	1580750	1	STM1502	T	SNP (transition)	C -> T	speG CDS	Substitution	172	E -> K	spermidine acetyltransferase	similar to E. coli spermidine N1-acetyltransferase (AAC74656.1); Blastp hit to AAC74656.1 (186 aa), 91% identity in aa 1 - 186
Salmonella enterica subsp. enterica serovar Typhimurium str. LT2 - NC_003197.2 (bases 1 to 4857450) extraction	1586261	1586261	1586261	1586261	1	STM1508	T	SNP (transition)	C -> T	ydfI CDS	Substitution	67	A -> V	D-mannonate oxidoreductase	similar to E. coli putative oxidoreductase (AAC74615.1); Blastp hit to AAC74615.1 (486 aa), 81% identity in aa 1 - 484
Salmonella enterica subsp. enterica serovar Typhimurium str. LT2 - NC_003197.2 (bases 1 to 4857450) extraction	1625845	1625845	1625845	1625845	1	STM1548	A	SNP (transition)	G -> A	putative S-adenosylmethionine:tRNA-ribosyltransferase-isomerase CDS	Substitution	314	D -> N	putative S-adenosylmethionine:tRNA-ribosyltransferase-isomerase	similar to E. coli synthesis of queuine in tRNA; probably S-adenosylmethionine:tRNA ribosyltransferase-isomerase (AAC73508.1); Blastp hit to AAC73508.1 (356 aa), 28% identity in aa 23 - 343
Salmonella enterica subsp. enterica serovar Typhimurium str. LT2 - NC_003197.2 (bases 1 to 4857450) extraction	1666082	1666082	1666082	1666082	1	STM1579	T	SNP (transition)	C -> T	narW CDS	Substitution	41	R -> C	nitrate reductase molybdenum cofactor assembly chaperone	assembly function; similar to E. coli cryptic nitrate reductase 2, delta subunit, assembly function (AAC74548.1); Blastp hit to AAC74548.1 (231 aa), 82% identity in aa 1 - 231
Salmonella enterica subsp. enterica serovar Typhimurium str. LT2 - NC_003197.2 (bases 1 to 4857450) extraction	1682427	1682427	1682427	1682427	1	STM1594	T	SNP (transition)	C -> T	srfB CDS	Substitution	447	P -> S	virulence factor SrfB	SrfB (gi|8347259)
Salmonella enterica subsp. enterica serovar Typhimurium str. LT2 - NC_003197.2 (bases 1 to 4857450) extraction	1754629	1754630	1754629	1754630	2	STM1660	TG	Substitution	CA -> TG	fnr CDS	Substitution	102	Q -> W	transcriptional regulator	regulates aerobic, anaerobic respiration and osmotic balance (CRP family); fumarate and nitrate reduction regulatory protein. (SW:FNR_SALTY)
Salmonella enterica subsp. enterica serovar Typhimurium str. LT2 - NC_003197.2 (bases 1 to 4857450) extraction	1762956	1762956	1762956	1762956	1	STM1669	C	SNP (transition)	T -> C	invasin CDS	Substitution	74	N -> S	invasin	homology to invasin C of Yersinia; similar to E. coli putative factor (AAC74304.1); Blastp hit to AAC74304.1 (417 aa), 30% identity in aa 38 - 403
Salmonella enterica subsp. enterica serovar Typhimurium - CP067397 (bases 1 to 4796208) extraction	1819086	1819181	1819086	1819181	96		misc								Trp leader region; Derived by automated computational analysis using gene prediction method: cmsearch.
Salmonella enterica subsp. enterica serovar Typhimurium str. LT2 - NC_003197.2 (bases 1 to 4857450) extraction	1822249	1822249	1822249	1822249	1	STM1725	A	SNP (transition)	G -> A	trpC CDS	Substitution	182	G -> D	bifunctional indole-3-glycerol phosphate synthase/phosphoribosylanthranilate isomerase	bifunctional; tryptophan biosynthesis protein TRPCF[includes: indole-3-glycerolphosphate synthase ].(SW:TRPC_SALTY)
Salmonella enterica subsp. enterica serovar Typhimurium str. LT2 - NC_003197.2 (bases 1 to 4857450) extraction	1841398	1841398	1841398	1841398	1	STM1747	A	SNP (transition)	G -> A	hypothetical protein CDS	Substitution	33	R -> Q	hypothetical protein
Salmonella enterica subsp. enterica serovar Typhimurium str. LT2 - NC_003197.2 (bases 1 to 4857450) extraction	1843744	1843744	1843744	1843744	1	STM1749	T	SNP (transition)	C -> T	adhE CDS	Substitution	208	P -> L	bifunctional acetaldehyde-CoA/alcohol dehydrogenase	similar to E. coli CoA-linked acetaldehyde dehydrogenase and iron-dependent alcohol dehydrogenase; pyruvate-formate-lyase deactivase (AAC74323.1); Blastp hit to AAC74323.1 (891 aa), 97% identity in aa 1 - 891
Salmonella enterica subsp. enterica serovar Typhimurium str. LT2 - NC_003197.2 (bases 1 to 4857450) extraction	1875176	1875176	1875176	1875176	1	STM1777	G	SNP (transition)	A -> G	hemA CDS	Substitution	177	F -> L	glutamyl-tRNA reductase	glutamyl-tRNA reductase. (SW:HEM1_SALTY)
Salmonella enterica subsp. enterica serovar Typhimurium str. LT2 - NC_003197.2 (bases 1 to 4857450) extraction	1943632	1943632	1943632	1943632	1	STM1846	T	SNP (transition)	C -> T	proQ CDS	Substitution	85	G -> D	RNA chaperone ProQ	similar to E. coli orf, hypothetical protein (AAC74901.1); Blastp hit to AAC74901.1 (39 aa), 94% identity in aa 1 - 39
Salmonella enterica subsp. enterica serovar Typhimurium str. LT2 - NC_003197.2 (bases 1 to 4857450) extraction	2023620	2023620	2023620	2023620	1	STM1928	T	SNP (transition)	C -> T	otsA CDS	Substitution	367	A -> T	alpha,alpha-trehalose-phosphate synthase	similar to E. coli trehalose-6-phosphate synthase (AAC74966.1); Blastp hit to AAC74966.1 (474 aa), 88% identity in aa 1 - 474
Salmonella enterica subsp. enterica serovar Typhimurium str. LT2 - NC_003197.2 (bases 1 to 4857450) extraction	2024412	2024412	2024412	2024412	1	STM1928	T	SNP (transition)	C -> T	otsA CDS	Substitution	103	E -> K	alpha,alpha-trehalose-phosphate synthase	similar to E. coli trehalose-6-phosphate synthase (AAC74966.1); Blastp hit to AAC74966.1 (474 aa), 88% identity in aa 1 - 474
Salmonella enterica subsp. enterica serovar Typhimurium str. LT2 - NC_003197.2 (bases 1 to 4857450) extraction	2025850	2025850	2025850	2025850	1		T	SNP (transition)	C -> T
Salmonella enterica subsp. enterica serovar Typhimurium str. LT2 - NC_003197.2 (bases 1 to 4857450) extraction	2036912	2036912	2036912	2036912	1	STM1946	G	SNP (transition)	A -> G	uvrC CDS	None	446		excinuclease ABC subunit C	forms a DNA excision repair enzyme with UvrAB; excinuclease ABC subunit C. (SW:UVRC_SALTY)
Salmonella enterica subsp. enterica serovar Typhimurium str. LT2 - NC_003197.2 (bases 1 to 4857450) extraction	2037106	2037106	2037106	2037106	1	STM1946	G	SNP (transversion)	C -> G	uvrC CDS	Substitution	381	S -> T	excinuclease ABC subunit C	forms a DNA excision repair enzyme with UvrAB; excinuclease ABC subunit C. (SW:UVRC_SALTY)
Salmonella enterica subsp. enterica serovar Typhimurium str. LT2 - NC_003197.2 (bases 1 to 4857450) extraction	2037384	2037384	2037384	2037384	1	STM1946	G	SNP (transition)	A -> G	uvrC CDS	None	288		excinuclease ABC subunit C	forms a DNA excision repair enzyme with UvrAB; excinuclease ABC subunit C. (SW:UVRC_SALTY)
Salmonella enterica subsp. enterica serovar Typhimurium str. LT2 - NC_003197.2 (bases 1 to 4857450) extraction	2037486	2037486	2037486	2037486	1	STM1946	C	SNP (transversion)	A -> C	uvrC CDS	None	254		excinuclease ABC subunit C	forms a DNA excision repair enzyme with UvrAB; excinuclease ABC subunit C. (SW:UVRC_SALTY)

## Sheet: Seg 2 S Abony H1 fla 
Sequence Name	Minimum	Maximum	Min (original sequence)	Max (original sequence)	Change	Length	Polymorphism Type	CDS	locus_tag	CDS Codon Number	Codon Change	CDS Position	Protein Effect	Amino Acid Change	product	\
uvrC-fliS Salmonella enterica subsp. enterica serovar Abony str. 0014 - NZ_CP007534.1 extraction (bases 3 to 15412)	-1	1831	1	1833		1833			SEEA0014_RS19195						excinuclease ABC subunit UvrC
uvrC-fliS Salmonella enterica subsp. enterica serovar Abony str. 0014 - NZ_CP007534.1 extraction (bases 3 to 15412)	-1	1831	1	1833		1833			SEEA0014_RS19195
Salmonella enterica subsp. enterica serovar Typhimurium - CP067397 (bases 2037077 to 2052486)	-1	1831	2037075	2038907		1833			JJB81_10010						excinuclease ABC subunit UvrC
Salmonella enterica subsp. enterica serovar Typhimurium - CP067397 (bases 2037077 to 2052486)	-1	1831	2037075	2038907		1833			JJB81_10010
uvrC-fliS Salmonella enterica subsp. enterica serovar Abony str. 0014 - NZ_CP007534.1 extraction (bases 3 to 15412)	1828	2484	1830	2486		657			SEEA0014_RS19200						UvrY/SirA/GacA family response regulator transcription factor
uvrC-fliS Salmonella enterica subsp. enterica serovar Abony str. 0014 - NZ_CP007534.1 extraction (bases 3 to 15412)	1828	2484	1830	2486		657			SEEA0014_RS19200
Salmonella enterica subsp. enterica serovar Typhimurium - CP067397 (bases 2037077 to 2052486)	1828	2484	2038904	2039560		657			JJB81_10015						UvrY/SirA/GacA family response regulator transcription factor
Salmonella enterica subsp. enterica serovar Typhimurium - CP067397 (bases 2037077 to 2052486)	1828	2484	2038904	2039560		657			JJB81_10015
uvrC-fliS Salmonella enterica subsp. enterica serovar Abony str. 0014 - NZ_CP007534.1 extraction (bases 3 to 15412)	2795	2950	2797	2952		156			SEEA0014_RS19205						hypothetical protein
uvrC-fliS Salmonella enterica subsp. enterica serovar Abony str. 0014 - NZ_CP007534.1 extraction (bases 3 to 15412)	2795	2950	2797	2952		156			SEEA0014_RS19205
Salmonella enterica subsp. enterica serovar Typhimurium - CP067397 (bases 2037077 to 2052486)	2795	2950	2039871	2040026		156			JJB81_10020						hypothetical protein
Salmonella enterica subsp. enterica serovar Typhimurium - CP067397 (bases 2037077 to 2052486)	2795	2950	2039871	2040026		156			JJB81_10020
uvrC-fliS Salmonella enterica subsp. enterica serovar Abony str. 0014 - NZ_CP007534.1 extraction (bases 3 to 15412)	2947	3171	2949	3173		225			SEEA0014_RS19210						DUF2594 family protein
uvrC-fliS Salmonella enterica subsp. enterica serovar Abony str. 0014 - NZ_CP007534.1 extraction (bases 3 to 15412)	2947	3171	2949	3173		225			SEEA0014_RS19210
Salmonella enterica subsp. enterica serovar Typhimurium - CP067397 (bases 2037077 to 2052486)	2947	3171	2040023	2040247		225			JJB81_10025						DUF2594 family protein
Salmonella enterica subsp. enterica serovar Typhimurium - CP067397 (bases 2037077 to 2052486)	2947	3171	2040023	2040247		225			JJB81_10025
uvrC-fliS Salmonella enterica subsp. enterica serovar Abony str. 0014 - NZ_CP007534.1 extraction (bases 3 to 15412)	3238	3960	3240	3962		723			SEEA0014_RS19215						transcriptional regulator SdiA
uvrC-fliS Salmonella enterica subsp. enterica serovar Abony str. 0014 - NZ_CP007534.1 extraction (bases 3 to 15412)	3238	3960	3240	3962		723			SEEA0014_RS19215
Salmonella enterica subsp. enterica serovar Typhimurium - CP067397 (bases 2037077 to 2052486)	3238	3960	2040314	2041036		723			JJB81_10030						transcriptional regulator SdiA
Salmonella enterica subsp. enterica serovar Typhimurium - CP067397 (bases 2037077 to 2052486)	3238	3960	2040314	2041036		723			JJB81_10030
uvrC-fliS Salmonella enterica subsp. enterica serovar Abony str. 0014 - NZ_CP007534.1 extraction (bases 3 to 15412)	4192	4944	4194	4946		753			SEEA0014_RS19220						L-cystine ABC transporter ATP-binding protein YecC
uvrC-fliS Salmonella enterica subsp. enterica serovar Abony str. 0014 - NZ_CP007534.1 extraction (bases 3 to 15412)	4192	4944	4194	4946		753			SEEA0014_RS19220
Salmonella enterica subsp. enterica serovar Typhimurium - CP067397 (bases 2037077 to 2052486)	4192	4944	2041268	2042020		753			JJB81_10035						L-cystine ABC transporter ATP-binding protein YecC
Salmonella enterica subsp. enterica serovar Typhimurium - CP067397 (bases 2037077 to 2052486)	4192	4944	2041268	2042020		753			JJB81_10035
uvrC-fliS Salmonella enterica subsp. enterica serovar Abony str. 0014 - NZ_CP007534.1 extraction (bases 3 to 15412)	4941	5609	4943	5611		669			SEEA0014_RS19225						cystine ABC transporter permease
uvrC-fliS Salmonella enterica subsp. enterica serovar Abony str. 0014 - NZ_CP007534.1 extraction (bases 3 to 15412)	4941	5609	4943	5611		669			SEEA0014_RS19225
Salmonella enterica subsp. enterica serovar Typhimurium - CP067397 (bases 2037077 to 2052486)	4941	5609	2042017	2042685		669			JJB81_10040						cystine ABC transporter permease
Salmonella enterica subsp. enterica serovar Typhimurium - CP067397 (bases 2037077 to 2052486)	4941	5609	2042017	2042685		669			JJB81_10040
uvrC-fliS Salmonella enterica subsp. enterica serovar Abony str. 0014 - NZ_CP007534.1 extraction (bases 3 to 15412)	5630	6616	5632	6618		987			SEEA0014_RS19230						D-cysteine desulfhydrase
uvrC-fliS Salmonella enterica subsp. enterica serovar Abony str. 0014 - NZ_CP007534.1 extraction (bases 3 to 15412)	5630	6616	5632	6618		987			SEEA0014_RS19230
Salmonella enterica subsp. enterica serovar Typhimurium - CP067397 (bases 2037077 to 2052486)	5630	6616	2042706	2043692		987			JJB81_10045						D-cysteine desulfhydrase
Salmonella enterica subsp. enterica serovar Typhimurium - CP067397 (bases 2037077 to 2052486)	5630	6616	2042706	2043692		987			JJB81_10045
uvrC-fliS Salmonella enterica subsp. enterica serovar Abony str. 0014 - NZ_CP007534.1 extraction (bases 3 to 15412)	6770	7570	6772	7572		801			SEEA0014_RS19235						cystine ABC transporter substrate-binding protein
uvrC-fliS Salmonella enterica subsp. enterica serovar Abony str. 0014 - NZ_CP007534.1 extraction (bases 3 to 15412)	6770	7570	6772	7572		801			SEEA0014_RS19235
Salmonella enterica subsp. enterica serovar Typhimurium - CP067397 (bases 2037077 to 2052486)	6770	7570	2043846	2044646		801			JJB81_10050						cystine ABC transporter substrate-binding protein
Salmonella enterica subsp. enterica serovar Typhimurium - CP067397 (bases 2037077 to 2052486)	6770	7570	2043846	2044646		801			JJB81_10050
uvrC-fliS Salmonella enterica subsp. enterica serovar Abony str. 0014 - NZ_CP007534.1 extraction (bases 3 to 15412)	7717	8268	7719	8270		552			SEEA0014_RS19240						flagella biosynthesis regulatory protein FliZ
uvrC-fliS Salmonella enterica subsp. enterica serovar Abony str. 0014 - NZ_CP007534.1 extraction (bases 3 to 15412)	7717	8268	7719	8270		552			SEEA0014_RS19240
Salmonella enterica subsp. enterica serovar Typhimurium - CP067397 (bases 2037077 to 2052486)	7717	8268	2044793	2045344		552			JJB81_10055						flagella biosynthesis regulatory protein FliZ
Salmonella enterica subsp. enterica serovar Typhimurium - CP067397 (bases 2037077 to 2052486)	7717	8268	2044793	2045344		552			JJB81_10055
uvrC-fliS Salmonella enterica subsp. enterica serovar Abony str. 0014 - NZ_CP007534.1 extraction (bases 3 to 15412)	8327	9046	8329	9048		720			SEEA0014_RS19245						RNA polymerase sigma factor FliA
uvrC-fliS Salmonella enterica subsp. enterica serovar Abony str. 0014 - NZ_CP007534.1 extraction (bases 3 to 15412)	8327	9046	8329	9048		720			SEEA0014_RS19245
Salmonella enterica subsp. enterica serovar Typhimurium - CP067397 (bases 2037077 to 2052486)	8327	9046	2045403	2046122		720			JJB81_10060						RNA polymerase sigma factor FliA
Salmonella enterica subsp. enterica serovar Typhimurium - CP067397 (bases 2037077 to 2052486)	8327	9046	2045403	2046122		720			JJB81_10060
uvrC-fliS Salmonella enterica subsp. enterica serovar Abony str. 0014 - NZ_CP007534.1 extraction (bases 3 to 15412)	9243	10448	9245	10450		1206			SEEA0014_RS19250						lysine-N-methylase
uvrC-fliS Salmonella enterica subsp. enterica serovar Abony str. 0014 - NZ_CP007534.1 extraction (bases 3 to 15412)	9243	10448	9245	10450		1206			SEEA0014_RS19250
Salmonella enterica subsp. enterica serovar Typhimurium - CP067397 (bases 2037077 to 2052486)	9243	10448	2046319	2047524		1206			JJB81_10065						flagellin lysine-N-methylase
Salmonella enterica subsp. enterica serovar Typhimurium - CP067397 (bases 2037077 to 2052486)	9243	10448	2046319	2047524		1206			JJB81_10065
uvrC-fliS Salmonella enterica subsp. enterica serovar Abony str. 0014 - NZ_CP007534.1 extraction (bases 3 to 15412)	10465	11720	10467	11722		1257			SEEA0014_RS24770						IS3 family transposase
uvrC-fliS Salmonella enterica subsp. enterica serovar Abony str. 0014 - NZ_CP007534.1 extraction (bases 3 to 15412)	10465	11720	10467	11722		1256			SEEA0014_RS24770
Salmonella enterica subsp. enterica serovar Typhimurium - CP067397 (bases 2037077 to 2052486)	10465	11720	2047541	2048796		1257			JJB81_10070						IS3 family transposase
Salmonella enterica subsp. enterica serovar Typhimurium - CP067397 (bases 2037077 to 2052486)	10465	11720	2047541	2048796		1256			JJB81_10070
uvrC-fliS Salmonella enterica subsp. enterica serovar Abony str. 0014 - NZ_CP007534.1 extraction (bases 3 to 15412)	11842	13329	11844	13331		1488			SEEA0014_RS19265						flagellin FliC
uvrC-fliS Salmonella enterica subsp. enterica serovar Abony str. 0014 - NZ_CP007534.1 extraction (bases 3 to 15412)	11842	13329	11844	13331		1488			SEEA0014_RS19265
Salmonella enterica subsp. enterica serovar Typhimurium - CP067397 (bases 2037077 to 2052486)	11842	13329	2048918	2050405		1488			JJB81_10075						flagellin FliC
Salmonella enterica subsp. enterica serovar Typhimurium - CP067397 (bases 2037077 to 2052486)	11842	13329	2048918	2050405		1488			JJB81_10075
uvrC-fliS Salmonella enterica subsp. enterica serovar Abony str. 0014 - NZ_CP007534.1 extraction (bases 3 to 15412)	13586	14989	13588	14991		1404			SEEA0014_RS19270						flagellar filament capping protein FliD
uvrC-fliS Salmonella enterica subsp. enterica serovar Abony str. 0014 - NZ_CP007534.1 extraction (bases 3 to 15412)	13586	14989	13588	14991		1404			SEEA0014_RS19270
Salmonella enterica subsp. enterica serovar Typhimurium - CP067397 (bases 2037077 to 2052486)	13586	14989	2050662	2052065		1404			JJB81_10080						flagellar filament capping protein FliD
Salmonella enterica subsp. enterica serovar Typhimurium - CP067397 (bases 2037077 to 2052486)	13586	14989	2050662	2052065		1404			JJB81_10080
uvrC-fliS Salmonella enterica subsp. enterica serovar Abony str. 0014 - NZ_CP007534.1 extraction (bases 3 to 15412)	15004	15411	15006	15413		408			SEEA0014_RS19275						flagellar export chaperone FliS
uvrC-fliS Salmonella enterica subsp. enterica serovar Abony str. 0014 - NZ_CP007534.1 extraction (bases 3 to 15412)	15004	15411	15006	15413		408			SEEA0014_RS19275
Salmonella enterica subsp. enterica serovar Typhimurium - CP067397 (bases 2037077 to 2052486)	15004	15411	2052080	2052487		408			JJB81_10085						flagellar export chaperone FliS
Salmonella enterica subsp. enterica serovar Typhimurium - CP067397 (bases 2037077 to 2052486)	15004	15411	2052080	2052487		408			JJB81_10085
uvrC-fliS Salmonella enterica subsp. enterica serovar Abony str. 0014 - NZ_CP007534.1 extraction (bases 3 to 15412)	15273	15273	15275	15275	C -> T	1	SNP (transition)	fliS CDS	SEEA0014_RS19275	90	GAC -> GAT	270	None		flagellar export chaperone FliS
uvrC-fliS Salmonella enterica subsp. enterica serovar Abony str. 0014 - NZ_CP007534.1 extraction (bases 3 to 15412)	15372	15372	15374	15374	A -> G	1	SNP (transition)	fliS CDS	SEEA0014_RS19275	123	AAA -> AAG	369	None		flagellar export chaperone FliS
uvrC-fliS Salmonella enterica subsp. enterica serovar Abony str. 0014 - NZ_CP007534.1 extraction (bases 3 to 15412)	10922	10922	10924	10924	C -> T	1	SNP (transition)	IS3 family transposase CDS	SEEA0014_RS24770	267	GGC -> GAC	800	Substitution	G -> D	IS3 family transposase

## Sheet: Seg 3 LT2 vs STK005 align extr2
Sequence Name	Minimum	Maximum	Min (original sequence)	Max (original sequence)	Length	locus_tag	Name	Polymorphism Type	Change	CDS	Protein Effect	CDS Codon Number	Amino Acid Change	product	note
Salmonella enterica subsp. enterica serovar Typhimurium str. LT2 - NC_003197.2 (bases 1 to 4857450) extraction	238	238	2050472	2050472	1	STM1960	C	SNP (transition)	T -> C	fliD CDS	None	79		flagellar filament-capping protein FliD	flagellar biosynthesis; enables filament assembly; flagellar hook-associated protein 2 (HAP2) (filament CAP protein)(flagellar CAP protein). (SW:FLID_SALTY)
Salmonella enterica subsp. enterica serovar Typhimurium str. LT2 - NC_003197.2 (bases 1 to 4857450) extraction	256	256	2050490	2050490	1	STM1960	G	SNP (transition)	A -> G	fliD CDS	None	85		flagellar filament-capping protein FliD	flagellar biosynthesis; enables filament assembly; flagellar hook-associated protein 2 (HAP2) (filament CAP protein)(flagellar CAP protein). (SW:FLID_SALTY)
Salmonella enterica subsp. enterica serovar Typhimurium str. LT2 - NC_003197.2 (bases 1 to 4857450) extraction	274	274	2050508	2050508	1	STM1960	G	SNP (transition)	A -> G	fliD CDS	None	91		flagellar filament-capping protein FliD	flagellar biosynthesis; enables filament assembly; flagellar hook-associated protein 2 (HAP2) (filament CAP protein)(flagellar CAP protein). (SW:FLID_SALTY)
Salmonella enterica subsp. enterica serovar Typhimurium str. LT2 - NC_003197.2 (bases 1 to 4857450) extraction	852	852	2051086	2051086	1	STM1961	T	SNP (transition)	C -> T	fliS CDS	None	90		flagellar export chaperone FliS	flagellar biosynthesis; flagellar protein FLIS. (SW:FLIS_SALTY)
Salmonella enterica subsp. enterica serovar Typhimurium str. LT2 - NC_003197.2 (bases 1 to 4857450) extraction	3998	3998	2054232	2054232	1	STM1965	T	SNP (transition)	C -> T	yedE CDS	Substitution	165	S -> F	putative membrane component of transport system	hypothetical 44.2 Kda protein in amyA-fliE intergenic region. (SW:YEDE_SALTY)
Salmonella enterica subsp. enterica serovar Typhimurium str. LT2 - NC_003197.2 (bases 1 to 4857450) extraction	5712	5712	2055946	2055946	1		T	SNP (transition)	C -> T
Salmonella enterica subsp. enterica serovar Typhimurium str. LT2 - NC_003197.2 (bases 1 to 4857450) extraction	6551	6551	2056785	2056785	1	STM1969		Deletion	=-G	fliF CDS	Frame Shift	84		flagellar M-ring protein FliF	flagellar biosynthesis; flagellar M-ring protein. (SW:FLIF_SALTY)
Salmonella enterica subsp. enterica serovar Typhimurium str. LT2 - NC_003197.2 (bases 1 to 4857450) extraction	6774	6774	2057008	2057008	1	STM1969	T	SNP (transition)	C -> T	fliF CDS	Substitution	158	A -> V	flagellar M-ring protein FliF	flagellar biosynthesis; flagellar M-ring protein. (SW:FLIF_SALTY)
Salmonella enterica subsp. enterica serovar Typhimurium str. LT2 - NC_003197.2 (bases 1 to 4857450) extraction	21262	21262	2071496	2071496	1		G	SNP (transition)	A -> G
Salmonella enterica subsp. enterica serovar Typhimurium str. LT2 - NC_003197.2 (bases 1 to 4857450) extraction	28149	28149	2078383	2078383	1	STM1995	T	SNP (transition)	C -> T	ompS CDS	Substitution	273	A -> V	putative porin	similar to E. coli putative outer membrane protein (AAC74459.1); Blastp hit to AAC74459.1 (377 aa), 71% identity in aa 1 - 236, 60% identity in aa 174 - 377
Salmonella enterica subsp. enterica serovar Typhimurium str. LT2 - NC_003197.2 (bases 1 to 4857450) extraction	29350	29350	2079584	2079584	1		T	SNP (transition)	C -> T
Salmonella enterica subsp. enterica serovar Typhimurium str. LT2 - NC_003197.2 (bases 1 to 4857450) extraction	32393	32393	2082627	2082627	1	STM2001	T	SNP (transition)	C -> T	yeeI CDS	Substitution	94	P -> S	hypothetical protein	similar to E. coli orf, hypothetical protein (AAC75041.1); Blastp hit to AAC75041.1 (278 aa), 85% identity in aa 14 - 263
Salmonella enterica subsp. enterica serovar Typhimurium str. LT2 - NC_003197.2 (bases 1 to 4857450) extraction	34734	34734	2084968	2084968	1		T	SNP (transition)	C -> T
Salmonella enterica subsp. enterica serovar Typhimurium str. LT2 - NC_003197.2 (bases 1 to 4857450) extraction	38209	38209	2088443	2088443	1	STM2007	T	SNP (transition)	C -> T	putative TPR repeat protein CDS	Substitution	509	A -> V	putative TPR repeat protein	similar to E. coli orf, hypothetical protein (AAC73745.1); Blastp hit to AAC73745.1 (327 aa), 32% identity in aa 130 - 322, 32% identity in aa 60 - 242, 32% identity in aa 17 - 168, 33% identity in aa 59 - 204, 23-1073758628dentity in aa 23 - 106
Salmonella enterica subsp. enterica serovar Typhimurium str. LT2 - NC_003197.2 (bases 1 to 4857450) extraction	40443	40443	2090677	2090677	1		T	SNP (transition)	C -> T
Salmonella enterica subsp. enterica serovar Typhimurium str. LT2 - NC_003197.2 (bases 1 to 4857450) extraction	45281	45281	2095515	2095515	1	STM2013	T	SNP (transition)	C -> T	yeeO CDS	Substitution	106	S -> N	FMN/FAD transporter	similar to E. coli orf, hypothetical protein (AAC75048.1); Blastp hit to AAC75048.1 (547 aa), 82% identity in aa 53 - 533
Salmonella enterica subsp. enterica serovar Typhimurium str. LT2 - NC_003197.2 (bases 1 to 4857450) extraction	45500	45500	2095734	2095734	1	STM2013	T	SNP (transition)	C -> T	yeeO CDS	Substitution	33	S -> N	FMN/FAD transporter	similar to E. coli orf, hypothetical protein (AAC75048.1); Blastp hit to AAC75048.1 (547 aa), 82% identity in aa 53 - 533
Salmonella enterica subsp. enterica serovar Typhimurium str. LT2 - NC_003197.2 (bases 1 to 4857450) extraction	51878	51878	2102112	2102112	1	STM2021	T	SNP (transition)	C -> T	cboQ CDS	Substitution	196	A -> T	cobalt ECF transporter T component CbiQ	cobalt transport protein CBIQ. (SW:CBIQ_SALTY)
Salmonella enterica subsp. enterica serovar Typhimurium str. LT2 - NC_003197.2 (bases 1 to 4857450) extraction	55211	55211	2105445	2105445	1	STM2026	T	SNP (transition)	C -> T	cbiJ CDS	None	185		cobalt-precorrin-6A reductase	precorrin-6x reductase. (SW:CBIJ_SALTY)
Salmonella enterica subsp. enterica serovar Typhimurium str. LT2 - NC_003197.2 (bases 1 to 4857450) extraction	60036	60036	2110270	2110270	1	STM2032	T	SNP (transition)	C -> T	cbiD CDS	Substitution	184	G -> D	cobalt-precorrin-5B (C(1))-methyltransferase	CBID protein. (SW:CBID_SALTY)
Salmonella enterica subsp. enterica serovar Typhimurium - CP067397 (bases 1 to 4796208) extraction	99206	99329	2150703	2150826	124		misc								His leader region; Derived by automated computational analysis using gene prediction method: cmsearch.
Salmonella enterica subsp. enterica serovar Typhimurium str. LT2 - NC_003197.2 (bases 1 to 4857450) extraction	116520	116520	2166754	2166754	1	STM2086		Deletion (tandem repeat)	(T)8 -> (T)7	rfbU CDS	Frame Shift	181		mannosyl transferase	LPS side chain defect; RFBU protein. (SW:RFBU_SALTY)
Salmonella enterica subsp. enterica serovar Typhimurium str. LT2 - NC_003197.2 (bases 1 to 4857450) extraction	133743	133743	2183977	2183977	1	STM2102		Deletion (tandem repeat)	(T)5 -> (T)4	wzxC CDS	Frame Shift	487		colanic acid exporter	in colanic acid gene cluster; similar to E. coli probable export protein (AAC75107.1); Blastp hit to AAC75107.1 (492 aa), 85% identity in aa 1 - 492
Salmonella enterica subsp. enterica serovar Typhimurium str. LT2 - NC_003197.2 (bases 1 to 4857450) extraction	141247	141247	2191481	2191481	1	STM2107		Deletion (tandem repeat)	(C)7 -> (C)6	wcaH CDS	Frame Shift	50		GDP-mannose mannosyl hydrolase
Salmonella enterica subsp. enterica serovar Typhimurium str. LT2 - NC_003197.2 (bases 1 to 4857450) extraction	163946	163946	2214180	2214180	1		T	SNP (transition)	C -> T
Salmonella enterica subsp. enterica serovar Typhimurium str. LT2 - NC_003197.2 (bases 1 to 4857450) extraction	173924	173924	2224158	2224158	1	STM2130	T	SNP (transition)	C -> T	baeS CDS	Substitution	342	P -> S	two-component system sensor histidine kinase BaeA	similar to E. coli sensor protein (for BaeR) (AAC75139.1); Blastp hit to AAC75139.1 (467 aa), 88% identity in aa 1 - 467
Salmonella enterica subsp. enterica serovar Typhimurium str. LT2 - NC_003197.2 (bases 1 to 4857450) extraction	196555	196555	2246789	2246789	1	STM2151	T	SNP (transition)	C -> T	stcB CDS	Substitution	84	G -> D	putative periplasmic chaperone protein	similar to E. coli putative chaperone (AAC75171.1);Blastp hit to AAC75171.1 (239 aa), 64% identity in aa 16 -239
Salmonella enterica subsp. enterica serovar Typhimurium str. LT2 - NC_003197.2 (bases 1 to 4857450) extraction	208082	208082	2258316	2258316	1	STM2163	T	SNP (transition)	C -> T	yehX CDS	Substitution	198	A -> T	ABC transporter ATP-binding protein	similar to E. coli putative ATP-binding component of a transport system (AAC75190.1); Blastp hit to AAC75190.1 (308 aa), 87% identity in aa 1 - 307
Salmonella enterica subsp. enterica serovar Typhimurium str. LT2 - NC_003197.2 (bases 1 to 4857450) extraction	225887	225887	2276121	2276121	1	STM2179	T	SNP (transition)	C -> T	4-hydroxybenzoate transporter CDS	Substitution	212	A -> T	4-hydroxybenzoate transporter	similar to E. coli putative transport protein (AAC73456.1); Blastp hit to AAC73456.1 (418 aa), 43% identity in aa 35 - 207, 40% identity in aa 220 - 380, 27% identity in aa 62 - 200
Salmonella enterica subsp. enterica serovar Typhimurium str. LT2 - NC_003197.2 (bases 1 to 4857450) extraction	234600	234600	2284834	2284834	1	STM2188	T	SNP (transition)	C -> T	mglC CDS	Substitution	38	S -> N	galactoside ABC transporter permease MglC	ABC superfamily (membrane); galactoside transport system permease protein MGLC. (SW:MGLC_SALTY)
Salmonella enterica subsp. enterica serovar Typhimurium str. LT2 - NC_003197.2 (bases 1 to 4857450) extraction	235090	235090	2285324	2285324	1	STM2189	A	SNP (transition)	G -> A	mglA CDS	Truncation	387		galactose/methyl galactoside ABC transporter ATP-binding protein MglA	ABC superfamily (atp_bind); galactoside transport ATP-binding protein MGLA. (SW:MGLA_SALTY)
Salmonella enterica subsp. enterica serovar Typhimurium str. LT2 - NC_003197.2 (bases 1 to 4857450) extraction	306627	306627	2356861	2356861	1	STM2259	T	SNP (transition)	C -> T	napA CDS	None	681		nitrate reductase catalytic subunit	complexes with NapB; similar to E. coli probable nitrate reductase 3 (AAC75266.1); Blastp hit to AAC75266.1 (828 aa), 94% identity in aa 1 - 828
Salmonella enterica subsp. enterica serovar Typhimurium str. LT2 - NC_003197.2 (bases 1 to 4857450) extraction	328464	328464	2378698	2378698	1	STM2274	T	SNP (transition)	C -> T	MFS transporter CDS	Substitution	201	D -> N	MFS transporter	similar to E. coli putative transport protein (AAC75306.1); Blastp hit to AAC75306.1 (442 aa), 30% identity in aa 18 - 428
Salmonella enterica subsp. enterica serovar Typhimurium str. LT2 - NC_003197.2 (bases 1 to 4857450) extraction	339736	339736	2389970	2389970	1		T	SNP (transition)	C -> T
Salmonella enterica subsp. enterica serovar Typhimurium str. LT2 - NC_003197.2 (bases 1 to 4857450) extraction	506349	506349	2556583	2556583	1		A	SNP (transition)	G -> A
Salmonella enterica subsp. enterica serovar Typhimurium str. LT2 - NC_003197.2 (bases 1 to 4857450) extraction	528985	528987	2579219	2579222	3		TAAAATAAATATCCTCCGGCATAGCCGGAGGTTTTTCAGATGCGCCTATAAGGCTCTCTTACCAGCCGCGCCCTAACAGGCGCATACGATCTGACATTTGCATCAAACTTCGTTACTTACGGCCCGTAAACGGGCTGCCCGGATACGGGATCGATAATTGCTCACCCATTTTATCCTCTTCAAGCTGGTGCTTTATGTAGTCCTGTATCTTCGCCGTGTTCTTACCCACCGTATCGACATAGTACCCTCTGCACCAGAACTCCCTGTTCCTGTATTTGAATTTTAGATCCCCAAACTGCTCGTAAAGCATCAGACTACTTTTACCCTTCAGATATCCCATGAAACTCGACACACTCATCTTCGGCGGGATCTCCAGAAGCATGTGAATATGATCTGCAC…	Insertion	TAA -> TAAAATAAATATCCTCCGGCATAGCCGGAGGTTTTTCAGATGCGCCTATAAGGCTCTCTTACCAGCCGCGCCCTAACAGGCGCATACGATCTGACATTTGCATCAAACTTCGTTACTTACGGCCCGTAAACGGGCTGCCCGGATACGGGATCGATAATTGCTCACCCATTTTATCCTCTTCAAGCTGGTGCTTTATGTAGTCCTGTATCTTCGCCGTGTTCTTACCCACCGTATCGACATAGTACCCTCTGCACCAGAACTCCCTGTTCCTGTATTTGAATTTTAGATCCCCAAACTGCTCGTAAAGCATCAGACTACTTTTACCCTTCAGATATCCCATGAAACTCGACACACTCATCTTCGGCGGGATCTCCAGAAGCATGTGAATATGA…
Salmonella enterica subsp. enterica serovar Typhimurium str. LT2 - NC_003197.2 (bases 1 to 4857450) extraction	528989	529697	2579223	2579931	709		mobile element
Salmonella enterica subsp. enterica serovar Typhimurium str. LT2 - NC_003197.2 (bases 1 to 4857450) extraction	623059	623059	2673293	2673293	1	STM2533	A	SNP (transition)	G -> A	sseA CDS	Substitution	130	E -> K	3-mercaptopyruvate sulfurtransferase	similar to E. coli putative thiosulfate sulfurtransferase (AAC75574.1); Blastp hit to AAC75574.1 (334 aa), 80% identity in aa 54 - 332
Salmonella enterica subsp. enterica serovar Typhimurium str. LT2 - NC_003197.2 (bases 1 to 4857450) extraction	680638	680695	2730872	2730930	58		GGGC	Deletion	GGGCAAGGGCAAGGGCAAGGGCAAGGGCAAGGGCAAGGGCAAGGGCAAGGGCAAGGGC -> GGGC
Salmonella enterica subsp. enterica serovar Typhimurium str. LT2 - NC_003197.2 (bases 1 to 4857450) extraction	682253	682253	2732487	2732487	1		T	SNP (transition)	C -> T
Salmonella enterica subsp. enterica serovar Typhimurium str. LT2 - NC_003197.2 (bases 1 to 4857450) extraction	691144	691144	2741378	2741378	1	STM2590	A	SNP (transition)	G -> A	Gifsy-1 prophage protein CDS	Substitution	43	A -> V	Gifsy-1 prophage protein	similar to tail assembly protein I in phage lambda
Salmonella enterica subsp. enterica serovar Typhimurium str. LT2 - NC_003197.2 (bases 1 to 4857450) extraction	695341	695341	2745575	2745575	1	STM2594	A	SNP (transition)	G -> A	Gifsy-1 prophage protein CDS	None	236		Gifsy-1 prophage protein	similar to phage tail component H; lambda phage H tail component homolog (gi|2232364)
Salmonella enterica subsp. enterica serovar Typhimurium str. LT2 - NC_003197.2 (bases 1 to 4857450) extraction	700458	700458	2750692	2750692	1	STM2602	A	SNP (transition)	G -> A	Gifsy-1 prophage protein CDS	Substitution	49	A -> V	Gifsy-1 prophage protein	similar to DNA packaging protein gp9 of phage N14
Salmonella enterica subsp. enterica serovar Typhimurium str. LT2 - NC_003197.2 (bases 1 to 4857450) extraction	700788	700788	2751022	2751022	1	STM2603	A	SNP (transition)	G -> A	Gifsy-1 prophage protein CDS	Substitution	301	A -> V	Gifsy-1 prophage protein	similar to head protein gp7 of phage 21
Salmonella enterica subsp. enterica serovar Typhimurium str. LT2 - NC_003197.2 (bases 1 to 4857450) extraction	707362	707362	2757596	2757596	1	STM2609	A	SNP (transition)	G -> A	Gifsy-1 prophage protein CDS	None	147		Gifsy-1 prophage protein	similar to DNA packaging protein Nu1 of phage 21; similar to E. coli homolog of Qin prophage packaging protein NU1 (AAC74621.1); Blastp hit to AAC74621.1 (189 aa), 58% identity in aa 1 - 162
Salmonella enterica subsp. enterica serovar Typhimurium str. LT2 - NC_003197.2 (bases 1 to 4857450) extraction	713276	713276	2763510	2763510	1	STM2617	A	SNP (transition)	G -> A	Gifsy-1 prophage protein CDS	Substitution	24	T -> I	Gifsy-1 prophage protein	similar to antiterminator Q
Salmonella enterica subsp. enterica serovar Typhimurium str. LT2 - NC_003197.2 (bases 1 to 4857450) extraction	716048	716048	2766282	2766282	1	STM2622	A	SNP (transition)	G -> A	Gifsy-1 prophage protein CDS	Substitution	30	S -> F	Gifsy-1 prophage protein	hypothetical protein 11 (gi|7467261)
Salmonella enterica subsp. enterica serovar Typhimurium str. LT2 - NC_003197.2 (bases 1 to 4857450) extraction	720019	720019	2770253	2770253	1	STM2629	G	SNP (transition)	A -> G	Gifsy-1 prophage protein CDS	Substitution	55	K -> R	Gifsy-1 prophage protein	hypothetical protein 2 (gi|7467263)
Salmonella enterica subsp. enterica serovar Typhimurium str. LT2 - NC_003197.2 (bases 1 to 4857450) extraction	720038	720038	2770272	2770272	1	STM2629	T	SNP (transition)	C -> T	Gifsy-1 prophage protein CDS	None	61		Gifsy-1 prophage protein	hypothetical protein 2 (gi|7467263)
Salmonella enterica subsp. enterica serovar Typhimurium str. LT2 - NC_003197.2 (bases 1 to 4857450) extraction	720171	720171	2770405	2770405	1	STM2630	A	SNP (transversion)	C -> A	Gifsy-1 prophage protein CDS	None	21		Gifsy-1 prophage protein	hypothetical protein 4 (gi|7467265)
Salmonella enterica subsp. enterica serovar Typhimurium str. LT2 - NC_003197.2 (bases 1 to 4857450) extraction	720182	720182	2770416	2770416	1	STM2630	G	SNP (transversion)	T -> G	Gifsy-1 prophage protein CDS	Substitution	25	L -> R	Gifsy-1 prophage protein	hypothetical protein 4 (gi|7467265)
Salmonella enterica subsp. enterica serovar Typhimurium str. LT2 - NC_003197.2 (bases 1 to 4857450) extraction	720202	720202	2770436	2770436	1	STM2630	A	SNP (transversion)	C -> A	Gifsy-1 prophage protein CDS	Substitution	32	R -> S	Gifsy-1 prophage protein	hypothetical protein 4 (gi|7467265)
Salmonella enterica subsp. enterica serovar Typhimurium str. LT2 - NC_003197.2 (bases 1 to 4857450) extraction	720234	720234	2770468	2770468	1	STM2630	T	SNP (transition)	C -> T	Gifsy-1 prophage protein CDS	None	42		Gifsy-1 prophage protein	hypothetical protein 4 (gi|7467265)
Salmonella enterica subsp. enterica serovar Typhimurium str. LT2 - NC_003197.2 (bases 1 to 4857450) extraction	720275	720275	2770509	2770509	1		A	SNP (transversion)	T -> A
Salmonella enterica subsp. enterica serovar Typhimurium str. LT2 - NC_003197.2 (bases 1 to 4857450) extraction	720322	720322	2770556	2770556	1	STM2631	A	SNP (transversion)	C -> A	Gifsy-1 prophage protein CDS	Substitution	12	L -> I	Gifsy-1 prophage protein	hypothetical protein 4 (gi|7467264)
Salmonella enterica subsp. enterica serovar Typhimurium str. LT2 - NC_003197.2 (bases 1 to 4857450) extraction	720422	720475	2770656	2770710	54	STM2631	ATC	Deletion	AGAAAGTCTCAGGCGTTATTCACTCAAATTCAACTGGCGAAACCACTGTGATTC -> ATC	Gifsy-1 prophage protein CDS	Deletion	45	KKVSGVIHSNSTGETTVIL -> NL	Gifsy-1 prophage protein	hypothetical protein 4 (gi|7467264)
Salmonella enterica subsp. enterica serovar Typhimurium str. LT2 - NC_003197.2 (bases 1 to 4857450) extraction	720508	720508	2770742	2770742	1	STM2631	A	SNP (transversion)	T -> A	Gifsy-1 prophage protein CDS	Substitution	74	C -> S	Gifsy-1 prophage protein	hypothetical protein 4 (gi|7467264)
Salmonella enterica subsp. enterica serovar Typhimurium str. LT2 - NC_003197.2 (bases 1 to 4857450) extraction	721429	721429	2771663	2771663	1	STM2632	A	SNP (transition)	G -> A	Gifsy-1 prophage protein CDS	Substitution	222	V -> I	Gifsy-1 prophage protein	exodeoxyribonuclease VIII homolog (gi|7467238)
Salmonella enterica subsp. enterica serovar Typhimurium str. LT2 - NC_003197.2 (bases 1 to 4857450) extraction	721632	721632	2771866	2771866	1	STM2632	T	SNP (transition)	C -> T	Gifsy-1 prophage protein CDS	None	289		Gifsy-1 prophage protein	exodeoxyribonuclease VIII homolog (gi|7467238)
Salmonella enterica subsp. enterica serovar Typhimurium str. LT2 - NC_003197.2 (bases 1 to 4857450) extraction	721842	721842	2772076	2772076	1	STM2632	G	SNP (transition)	A -> G	Gifsy-1 prophage protein CDS	None	359		Gifsy-1 prophage protein	exodeoxyribonuclease VIII homolog (gi|7467238)
Salmonella enterica subsp. enterica serovar Typhimurium str. LT2 - NC_003197.2 (bases 1 to 4857450) extraction	722058	722058	2772292	2772292	1	STM2632	G	SNP (transition)	A -> G	Gifsy-1 prophage protein CDS	None	431		Gifsy-1 prophage protein	exodeoxyribonuclease VIII homolog (gi|7467238)
Salmonella enterica subsp. enterica serovar Typhimurium str. LT2 - NC_003197.2 (bases 1 to 4857450) extraction	722255	722255	2772489	2772489	1	STM2632	G	SNP (transition)	A -> G	Gifsy-1 prophage protein CDS	Substitution	497	D -> G	Gifsy-1 prophage protein	exodeoxyribonuclease VIII homolog (gi|7467238)
Salmonella enterica subsp. enterica serovar Typhimurium str. LT2 - NC_003197.2 (bases 1 to 4857450) extraction	722304	722307	2772538	2772542	4	STM2632	GGCTGAGACGCACCAGAACAACGATTCTGTGAGCCAATCTGAACCT	Insertion	GGCT -> GGCTGAGACGCACCAGAACAACGATTCTGTGAGCCAATCTGAACCT	Gifsy-1 prophage protein CDS	Insertion	513	QA -> QAETHQNNDSVSQSEP	Gifsy-1 prophage protein	exodeoxyribonuclease VIII homolog (gi|7467238)
Salmonella enterica subsp. enterica serovar Typhimurium str. LT2 - NC_003197.2 (bases 1 to 4857450) extraction	722406	722406	2772640	2772640	1	STM2632	G	SNP (transition)	A -> G	Gifsy-1 prophage protein CDS	None	547		Gifsy-1 prophage protein	exodeoxyribonuclease VIII homolog (gi|7467238)
Salmonella enterica subsp. enterica serovar Typhimurium str. LT2 - NC_003197.2 (bases 1 to 4857450) extraction	722424	722424	2772658	2772658	1	STM2632	C	SNP (transition)	T -> C	Gifsy-1 prophage protein CDS	None	553		Gifsy-1 prophage protein	exodeoxyribonuclease VIII homolog (gi|7467238)
Salmonella enterica subsp. enterica serovar Typhimurium str. LT2 - NC_003197.2 (bases 1 to 4857450) extraction	722496	722496	2772730	2772730	1	STM2632	G	SNP (transition)	A -> G	Gifsy-1 prophage protein CDS	None	577		Gifsy-1 prophage protein	exodeoxyribonuclease VIII homolog (gi|7467238)
Salmonella enterica subsp. enterica serovar Typhimurium str. LT2 - NC_003197.2 (bases 1 to 4857450) extraction	722870	722870	2773104	2773104	1	STM2632	C	SNP (transition)	T -> C	Gifsy-1 prophage protein CDS	Substitution	702	V -> A	Gifsy-1 prophage protein	exodeoxyribonuclease VIII homolog (gi|7467238)
Salmonella enterica subsp. enterica serovar Typhimurium str. LT2 - NC_003197.2 (bases 1 to 4857450) extraction	724093	724093	2774327	2774327	1	STM2633	G	SNP (transition)	A -> G	Gifsy-1 prophage protein CDS	None	160		Gifsy-1 prophage protein	similar to enterohemolysin 1 in E. coli; hypothetical protein AAC26069.1 (gi|7467267)
Salmonella enterica subsp. enterica serovar Typhimurium str. LT2 - NC_003197.2 (bases 1 to 4857450) extraction	726544	726544	2776778	2776778	1	STM2636	A	SNP (transition)	G -> A	Gifsy-1 prophage protein CDS	None	14		Gifsy-1 prophage protein	similar to integrase in phage; probable integrase (gi|7467280)
Salmonella enterica subsp. enterica serovar Typhimurium str. LT2 - NC_003197.2 (bases 1 to 4857450) extraction	727618	727618	2777852	2777852	1	STM2638	A	SNP (transition)	G -> A	rseB CDS	Substitution	300	L -> F	sigma-E factor regulatory protein RseB	similar to E. coli regulates activity of sigma-E factor (AAC75624.1); Blastp hit to AAC75624.1 (318 aa), 89% identity in aa 1 - 318
Salmonella enterica subsp. enterica serovar Typhimurium str. LT2 - NC_003197.2 (bases 1 to 4857450) extraction	727978	727978	2778212	2778212	1	STM2638	A	SNP (transition)	G -> A	rseB CDS	None	180		sigma-E factor regulatory protein RseB	similar to E. coli regulates activity of sigma-E factor (AAC75624.1); Blastp hit to AAC75624.1 (318 aa), 89% identity in aa 1 - 318
Salmonella enterica subsp. enterica serovar Typhimurium str. LT2 - NC_003197.2 (bases 1 to 4857450) extraction	731923	731923	2782157	2782157	1	STM2642	A	SNP (transition)	G -> A	yfiC CDS	Substitution	207	L -> F	tRNA (adenosine(37)-N6)-methyltransferase TrmM	similar to E. coli putative enzyme (AAC75628.1); Blastp hit to AAC75628.1 (285 aa), 84% identity in aa 41 - 285
Salmonella enterica subsp. enterica serovar Typhimurium str. LT2 - NC_003197.2 (bases 1 to 4857450) extraction	737808	737808	2788042	2788042	1	STM2648	A	SNP (transition)	G -> A	yfiF CDS	Substitution	138	P -> S	putative tRNA/rRNA methyltransferase	similar to E. coli orf, hypothetical protein (AAC75634.1); Blastp hit to AAC75634.1 (345 aa), 87% identity in aa 1 - 345
Salmonella enterica subsp. enterica serovar Typhimurium str. LT2 - NC_003197.2 (bases 1 to 4857450) extraction	746209	746330	2796443	2796564	122	STM2656	rrfG rRNA							5S ribosomal RNA
Salmonella enterica subsp. enterica serovar Typhimurium - CP067397 (bases 1 to 4796208) extraction	746858	746973	2798355	2798470	116	JJB81_13680	rrf rRNA							5S ribosomal RNA	Derived by automated computational analysis using gene prediction method: cmsearch.
Salmonella enterica subsp. enterica serovar Typhimurium str. LT2 - NC_003197.2 (bases 1 to 4857450) extraction	746524	749533	2796758	2799767	3010	STM2657	rrlG rRNA							23S ribosomal RNA
Salmonella enterica subsp. enterica serovar Typhimurium - CP067397 (bases 1 to 4796208) extraction	747171	750178	2798668	2801675	3008	JJB81_13685	23S rRNA							23S ribosomal RNA	Derived by automated computational analysis using gene prediction method: cmsearch.
Salmonella enterica subsp. enterica serovar Typhimurium str. LT2 - NC_003197.2 (bases 1 to 4857450) extraction	748274	748274	2798508	2798508	1		A	SNP (transition)	G -> A
Salmonella enterica subsp. enterica serovar Typhimurium str. LT2 - NC_003197.2 (bases 1 to 4857450) extraction	749025	749025	2799259	2799259	1		A	SNP (transition)	G -> A
Salmonella enterica subsp. enterica serovar Typhimurium str. LT2 - NC_003197.2 (bases 1 to 4857450) extraction	749887	751429	2800121	2801663	1543	STM2659	rrsG rRNA							16S ribosomal RNA
Salmonella enterica subsp. enterica serovar Typhimurium - CP067397 (bases 1 to 4796208) extraction	750533	752074	2802030	2803571	1542	JJB81_13695	16S rRNA							16S ribosomal RNA	Derived by automated computational analysis using gene prediction method: cmsearch.
Salmonella enterica subsp. enterica serovar Typhimurium str. LT2 - NC_003197.2 (bases 1 to 4857450) extraction	752510	752510	2802744	2802744	1	STM2660	A	SNP (transition)	G -> A	clpB CDS	Substitution	650	P -> L	ATP-dependent chaperone ClpB	Hsp 100; part of novel multi-chaperone system with DnaK, DnaJ, and GrpE; similar to E. coli heat shock protein (AAC75641.1); Blastp hit to AAC75641.1 (857 aa), 96% identity in aa 1 - 857
Salmonella enterica subsp. enterica serovar Typhimurium str. LT2 - NC_003197.2 (bases 1 to 4857450) extraction	756002	756002	2806236	2806236	1	STM2662	A	SNP (transition)	G -> A	rluD CDS	Substitution	99	P -> S	23S rRNA pseudouridine(1911/1915/1917) synthase	pseudouridines 1911, 1915, 1917 in 23S RNA; similarto E. coli suppressor of ftsH mutation (AAC75643.1);Blastp hit to AAC75643.1 (326 aa), 93% identity in aa 1 -326
Salmonella enterica subsp. enterica serovar Typhimurium - CP067397 (bases 1 to 4796208) extraction	758523	758648	2810020	2810145	126		misc								Phe leader region; Derived by automated computational analysis using gene prediction method: cmsearch.

## Sheet: Seg 4 S Abony H2 fla
Sequence Name	Minimum	Maximum	Min (original sequence)	Max (original sequence)	Change	Length	Polymorphism Type	CDS	locus_tag	CDS Codon Number	Codon Change	CDS Position	Protein Effect	Amino Acid Change	product
Salmonella enterica subsp. enterica serovar Typhimurium - CP067397 (bases 2822320 to 2864091)	-868	418	2821451	2822737		1287			JJB81_13790						HlyC/CorC family transporter
Salmonella enterica subsp. enterica serovar Typhimurium - CP067397 (bases 2822320 to 2864091)	-868	418	2821451	2822737		1287			JJB81_13790
S Abony fla region grpE to tonB NZ_CP007534 extraction (bases 3 to 41771)	-1	418	1	420		420			SEEA0014_RS22805						DUF21 domain-containing protein
S Abony fla region grpE to tonB NZ_CP007534 extraction (bases 3 to 41771)	-1	418	1	420		420			SEEA0014_RS22805
S Abony fla region grpE to tonB NZ_CP007534 extraction (bases 3 to 41771)	73	73	75	75	T -> G	1	SNP (transversion)	DUF21 domain-containing protein CDS	SEEA0014_RS22805	25	GGT -> GGG	75	None		DUF21 domain-containing protein
S Abony fla region grpE to tonB NZ_CP007534 extraction (bases 3 to 41771)	100	100	102	102	A -> G	1	SNP (transition)	DUF21 domain-containing protein CDS	SEEA0014_RS22805	34	GAA -> GAG	102	None		DUF21 domain-containing protein
S Abony fla region grpE to tonB NZ_CP007534 extraction (bases 3 to 41771)	109	109	111	111	C -> T	1	SNP (transition)	DUF21 domain-containing protein CDS	SEEA0014_RS22805	37	GTC -> GTT	111	None		DUF21 domain-containing protein
S Abony fla region grpE to tonB NZ_CP007534 extraction (bases 3 to 41771)	124	124	126	126	C -> A	1	SNP (transversion)	DUF21 domain-containing protein CDS	SEEA0014_RS22805	42	ACC -> ACA	126	None		DUF21 domain-containing protein
S Abony fla region grpE to tonB NZ_CP007534 extraction (bases 3 to 41771)	238	238	240	240	A -> G	1	SNP (transition)	DUF21 domain-containing protein CDS	SEEA0014_RS22805	80	CCA -> CCG	240	None		DUF21 domain-containing protein
S Abony fla region grpE to tonB NZ_CP007534 extraction (bases 3 to 41771)	244	244	246	246	C -> T	1	SNP (transition)	DUF21 domain-containing protein CDS	SEEA0014_RS22805	82	GAC -> GAT	246	None		DUF21 domain-containing protein
S Abony fla region grpE to tonB NZ_CP007534 extraction (bases 3 to 41771)	334	334	336	336	C -> A	1	SNP (transversion)	DUF21 domain-containing protein CDS	SEEA0014_RS22805	112	ATC -> ATA	336	None		DUF21 domain-containing protein
Salmonella enterica subsp. enterica serovar Typhimurium - CP067397 (bases 2822320 to 2864091)	539	1144	2822858	2823463		606			JJB81_13795						cytoplasmic protein
Salmonella enterica subsp. enterica serovar Typhimurium - CP067397 (bases 2822320 to 2864091)	539	1144	2822858	2823463		606			JJB81_13795
S Abony fla region grpE to tonB NZ_CP007534 extraction (bases 3 to 41771)	539	1144	541	1146		606			SEEA0014_RS22810						hypothetical protein
S Abony fla region grpE to tonB NZ_CP007534 extraction (bases 3 to 41771)	539	1144	541	1146		606			SEEA0014_RS22810
Salmonella enterica subsp. enterica serovar Typhimurium - CP067397 (bases 2822320 to 2864091)	1179	1769	2823498	2824088		591			JJB81_13800						nucleotide exchange factor GrpE
Salmonella enterica subsp. enterica serovar Typhimurium - CP067397 (bases 2822320 to 2864091)	1179	1769	2823498	2824088		591			JJB81_13800
S Abony fla region grpE to tonB NZ_CP007534 extraction (bases 3 to 41771)	1179	1769	1181	1771		591			SEEA0014_RS22815						nucleotide exchange factor GrpE
S Abony fla region grpE to tonB NZ_CP007534 extraction (bases 3 to 41771)	1179	1769	1181	1771		591			SEEA0014_RS22815
S Abony fla region grpE to tonB NZ_CP007534 extraction (bases 3 to 41771)	1785	1961	1787	1963		177			SEEA0014_RS24840						molecular chaperone GrpE
S Abony fla region grpE to tonB NZ_CP007534 extraction (bases 3 to 41771)	1785	1961	1787	1963		177			SEEA0014_RS24840
Salmonella enterica subsp. enterica serovar Typhimurium - CP067397 (bases 2822320 to 2864091)	1893	2771	2824212	2825090		879			JJB81_13805						NAD(+) kinase
Salmonella enterica subsp. enterica serovar Typhimurium - CP067397 (bases 2822320 to 2864091)	1893	2771	2824212	2825090		879			JJB81_13805
S Abony fla region grpE to tonB NZ_CP007534 extraction (bases 3 to 41771)	1893	2771	1895	2773		879			SEEA0014_RS22820						NAD(+) kinase
S Abony fla region grpE to tonB NZ_CP007534 extraction (bases 3 to 41771)	1893	2771	1895	2773		879			SEEA0014_RS22820
Salmonella enterica subsp. enterica serovar Typhimurium - CP067397 (bases 2822320 to 2864091)	2857	4518	2825176	2826837		1662			JJB81_13810						DNA repair protein RecN
Salmonella enterica subsp. enterica serovar Typhimurium - CP067397 (bases 2822320 to 2864091)	2857	4518	2825176	2826837		1662			JJB81_13810
S Abony fla region grpE to tonB NZ_CP007534 extraction (bases 3 to 41771)	2857	4518	2859	4520		1662			SEEA0014_RS22825						DNA repair protein RecN
S Abony fla region grpE to tonB NZ_CP007534 extraction (bases 3 to 41771)	2857	4518	2859	4520		1662			SEEA0014_RS22825
S Abony fla region grpE to tonB NZ_CP007534 extraction (bases 3 to 41771)	3279	3279	3281	3281	G -> A	1	SNP (transition)	DNA repair protein RecN CDS	SEEA0014_RS22825	141	CAG -> CAA	423	None		DNA repair protein RecN
Salmonella enterica subsp. enterica serovar Typhimurium - CP067397 (bases 2822320 to 2864091)	4667	5005	2826986	2827324		339			JJB81_13815						outer membrane protein assembly factor BamE
Salmonella enterica subsp. enterica serovar Typhimurium - CP067397 (bases 2822320 to 2864091)	4667	5005	2826986	2827324		339			JJB81_13815
S Abony fla region grpE to tonB NZ_CP007534 extraction (bases 3 to 41771)	4667	5005	4669	5007		339			SEEA0014_RS22830						outer membrane protein assembly factor BamE
S Abony fla region grpE to tonB NZ_CP007534 extraction (bases 3 to 41771)	4667	5005	4669	5007		339			SEEA0014_RS22830
Salmonella enterica subsp. enterica serovar Typhimurium - CP067397 (bases 2822320 to 2864091)	5171	5461	2827490	2827780		291			JJB81_13820						RnfH family protein
Salmonella enterica subsp. enterica serovar Typhimurium - CP067397 (bases 2822320 to 2864091)	5171	5461	2827490	2827780		291			JJB81_13820
S Abony fla region grpE to tonB NZ_CP007534 extraction (bases 3 to 41771)	5171	5461	5173	5463		291			SEEA0014_RS22835						RnfH family protein
S Abony fla region grpE to tonB NZ_CP007534 extraction (bases 3 to 41771)	5171	5461	5173	5463		291			SEEA0014_RS22835
Salmonella enterica subsp. enterica serovar Typhimurium - CP067397 (bases 2822320 to 2864091)	5451	5888	2827770	2828207		438			JJB81_13825						type II toxin-antitoxin system RatA family toxin
Salmonella enterica subsp. enterica serovar Typhimurium - CP067397 (bases 2822320 to 2864091)	5451	5888	2827770	2828207		438			JJB81_13825
S Abony fla region grpE to tonB NZ_CP007534 extraction (bases 3 to 41771)	5451	5927	5453	5929		477			SEEA0014_RS22840						ubiquinone-binding protein
S Abony fla region grpE to tonB NZ_CP007534 extraction (bases 3 to 41771)	5451	5927	5453	5929		477			SEEA0014_RS22840
Salmonella enterica subsp. enterica serovar Typhimurium - CP067397 (bases 2822320 to 2864091)	6077	6559	2828396	2828878		483			JJB81_13830						SsrA-binding protein SmpB
Salmonella enterica subsp. enterica serovar Typhimurium - CP067397 (bases 2822320 to 2864091)	6077	6559	2828396	2828878		483			JJB81_13830
S Abony fla region grpE to tonB NZ_CP007534 extraction (bases 3 to 41771)	6077	6559	6079	6561		483			SEEA0014_RS22845						SsrA-binding protein
S Abony fla region grpE to tonB NZ_CP007534 extraction (bases 3 to 41771)	6077	6559	6079	6561		483			SEEA0014_RS22845
Salmonella enterica subsp. enterica serovar Typhimurium - CP067397 (bases 2822320 to 2864091)	7174	18648	2829493	2840967		11475			JJB81_13835						biofilm-associated protein BapA
Salmonella enterica subsp. enterica serovar Typhimurium - CP067397 (bases 2822320 to 2864091)	7174	18648	2829493	2840967		11475			JJB81_13835
S Abony fla region grpE to tonB NZ_CP007534 extraction (bases 3 to 41771)	7174	18648	7176	18650		11475			SEEA0014_RS22850						Ig-like domain repeat protein
S Abony fla region grpE to tonB NZ_CP007534 extraction (bases 3 to 41771)	7174	18648	7176	18650		11475			SEEA0014_RS22850
S Abony fla region grpE to tonB NZ_CP007534 extraction (bases 3 to 41771)	9618	9618	9620	9620	C -> T	1	SNP (transition)	Ig-like domain repeat protein CDS	SEEA0014_RS22850	815	GGC -> GGT	2445	None		Ig-like domain repeat protein
S Abony fla region grpE to tonB NZ_CP007534 extraction (bases 3 to 41771)	14427	14427	14429	14429	G -> A	1	SNP (transition)	Ig-like domain repeat protein CDS	SEEA0014_RS22850	2418	CAG -> CAA	7254	None		Ig-like domain repeat protein
S Abony fla region grpE to tonB NZ_CP007534 extraction (bases 3 to 41771)	15511	15511	15513	15513	G -> A	1	SNP (transition)	Ig-like domain repeat protein CDS	SEEA0014_RS22850	2780	GGT -> AGT	8338	Substitution	G -> S	Ig-like domain repeat protein
S Abony fla region grpE to tonB NZ_CP007534 extraction (bases 3 to 41771)	16593	16593	16595	16595	G -> A	1	SNP (transition)	Ig-like domain repeat protein CDS	SEEA0014_RS22850	3140	CAG -> CAA	9420	None		Ig-like domain repeat protein
S Abony fla region grpE to tonB NZ_CP007534 extraction (bases 3 to 41771)	17132	17132	17134	17134	G -> A	1	SNP (transition)	Ig-like domain repeat protein CDS	SEEA0014_RS22850	3320	GGC -> GAC	9959	Substitution	G -> D	Ig-like domain repeat protein
Salmonella enterica subsp. enterica serovar Typhimurium - CP067397 (bases 2822320 to 2864091)	18713	20122	2841032	2842441		1410			JJB81_13840						TolC family outer membrane protein
Salmonella enterica subsp. enterica serovar Typhimurium - CP067397 (bases 2822320 to 2864091)	18713	20122	2841032	2842441		1410			JJB81_13840
S Abony fla region grpE to tonB NZ_CP007534 extraction (bases 3 to 41771)	18713	20122	18715	20124		1410			SEEA0014_RS22855						TolC family type I secretion outer membrane protein
S Abony fla region grpE to tonB NZ_CP007534 extraction (bases 3 to 41771)	18713	20122	18715	20124		1410			SEEA0014_RS22855
Salmonella enterica subsp. enterica serovar Typhimurium - CP067397 (bases 2822320 to 2864091)	20119	22299	2842438	2844618		2181			JJB81_13845						type I secretion system permease/ATPase
Salmonella enterica subsp. enterica serovar Typhimurium - CP067397 (bases 2822320 to 2864091)	20119	22299	2842438	2844618		2181			JJB81_13845
S Abony fla region grpE to tonB NZ_CP007534 extraction (bases 3 to 41771)	20119	22299	20121	22301		2181			SEEA0014_RS22860						type I secretion system permease/ATPase
S Abony fla region grpE to tonB NZ_CP007534 extraction (bases 3 to 41771)	20119	22299	20121	22301		2181			SEEA0014_RS22860
Salmonella enterica subsp. enterica serovar Typhimurium - CP067397 (bases 2822320 to 2864091)	22307	23470	2844626	2845789		1164			JJB81_13850						HlyD family type I secretion periplasmic adaptorsubunit
Salmonella enterica subsp. enterica serovar Typhimurium - CP067397 (bases 2822320 to 2864091)	22307	23470	2844626	2845789		1164			JJB81_13850
S Abony fla region grpE to tonB NZ_CP007534 extraction (bases 3 to 41771)	22307	23470	22309	23472		1164			SEEA0014_RS22865						HlyD family type I secretion periplasmic adaptorsubunit
S Abony fla region grpE to tonB NZ_CP007534 extraction (bases 3 to 41771)	22307	23470	22309	23472		1164			SEEA0014_RS22865
Salmonella enterica subsp. enterica serovar Typhimurium - CP067397 (bases 2822320 to 2864091)	23542	23904	2845861	2846223		363			JJB81_13855						transfer-messenger RNA
Salmonella enterica subsp. enterica serovar Typhimurium - CP067397 (bases 2822320 to 2864091)	23542	23904	2845861	2846223		363			JJB81_13855
S Abony fla region grpE to tonB NZ_CP007534 extraction (bases 3 to 41771)	23542	23904	23544	23906		363			SEEA0014_RS23025						transfer-messenger RNA
S Abony fla region grpE to tonB NZ_CP007534 extraction (bases 3 to 41771)	23542	23904	23544	23906		363			SEEA0014_RS23025
Salmonella enterica subsp. enterica serovar Typhimurium - CP067397 (bases 2822320 to 2864091)	24127	25295	2846446	2847614		1170			JJB81_13860						IS3 family transposase
Salmonella enterica subsp. enterica serovar Typhimurium - CP067397 (bases 2822320 to 2864091)	24127	25295	2846446	2847614		1169			JJB81_13860
S Abony fla region grpE to tonB NZ_CP007534 extraction (bases 3 to 41771)	24127	25295	24129	25297		1169			SEEA0014_RS00010						IS3 family transposase
S Abony fla region grpE to tonB NZ_CP007534 extraction (bases 3 to 41771)	24127	25295	24129	25297		1169			SEEA0014_RS00010
Salmonella enterica subsp. enterica serovar Typhimurium - CP067397 (bases 2822320 to 2864091)	25663	25890	2847982	2848209		228			JJB81_13865						hypothetical protein
Salmonella enterica subsp. enterica serovar Typhimurium - CP067397 (bases 2822320 to 2864091)	25663	25890	2847982	2848209		228			JJB81_13865
S Abony fla region grpE to tonB NZ_CP007534 extraction (bases 3 to 41771)	25663	25890	25665	25892		228			SEEA0014_RS00015						hypothetical protein
S Abony fla region grpE to tonB NZ_CP007534 extraction (bases 3 to 41771)	25663	25890	25665	25892		228			SEEA0014_RS00015
Salmonella enterica subsp. enterica serovar Typhimurium - CP067397 (bases 2822320 to 2864091)	25921	26880	2848240	2849199		960			JJB81_13870						RNA-directed DNA polymerase
Salmonella enterica subsp. enterica serovar Typhimurium - CP067397 (bases 2822320 to 2864091)	25921	26880	2848240	2849199		960			JJB81_13870
S Abony fla region grpE to tonB NZ_CP007534 extraction (bases 3 to 41771)	25921	26880	25923	26882		960			SEEA0014_RS00020						RNA-directed DNA polymerase
S Abony fla region grpE to tonB NZ_CP007534 extraction (bases 3 to 41771)	25921	26880	25923	26882		960			SEEA0014_RS00020
Salmonella enterica subsp. enterica serovar Typhimurium - CP067397 (bases 2822320 to 2864091)	26783	27768	2849102	2850087		986			JJB81_13875						nucleotide-binding protein
Salmonella enterica subsp. enterica serovar Typhimurium - CP067397 (bases 2822320 to 2864091)	26783	27768	2849102	2850087		986			JJB81_13875
S Abony fla region grpE to tonB NZ_CP007534 extraction (bases 3 to 41771)	26930	27768	26932	27770		839			SEEA0014_RS22895						hypothetical protein
S Abony fla region grpE to tonB NZ_CP007534 extraction (bases 3 to 41771)	26930	27768	26932	27770		839			SEEA0014_RS22895
S Abony fla region grpE to tonB NZ_CP007534 extraction (bases 3 to 41771)	28106	28358	28108	28360		253			SEEA0014_RS23035						hypothetical protein
S Abony fla region grpE to tonB NZ_CP007534 extraction (bases 3 to 41771)	28106	28358	28108	28360		253			SEEA0014_RS23035
Salmonella enterica subsp. enterica serovar Typhimurium - CP067397 (bases 2822320 to 2864091)	28386	28925	2850705	2851244		540			JJB81_13880						phase 1 flagellin gene repressor FljA
Salmonella enterica subsp. enterica serovar Typhimurium - CP067397 (bases 2822320 to 2864091)	28386	28925	2850705	2851244		540			JJB81_13880
S Abony fla region grpE to tonB NZ_CP007534 extraction (bases 3 to 41771)	28386	28925	28388	28927		540			SEEA0014_RS00035						phase 1 flagellin gene repressor
S Abony fla region grpE to tonB NZ_CP007534 extraction (bases 3 to 41771)	28386	28925	28388	28927		540			SEEA0014_RS00035
Salmonella enterica subsp. enterica serovar Typhimurium - CP067397 (bases 2822320 to 2864091)	28993	30498	2851312	2852817		1506			JJB81_13885						flagellin FliC
Salmonella enterica subsp. enterica serovar Typhimurium - CP067397 (bases 2822320 to 2864091)	28993	30498	2851312	2852817		1506			JJB81_13885
S Abony fla region grpE to tonB NZ_CP007534 extraction (bases 3 to 41771)	28993	30498	28995	30500		1506			SEEA0014_RS00040						flagellin FliC
S Abony fla region grpE to tonB NZ_CP007534 extraction (bases 3 to 41771)	28993	30498	28995	30500		1506			SEEA0014_RS00040
Salmonella enterica subsp. enterica serovar Typhimurium - CP067397 (bases 2822320 to 2864091)	30862	31434	2853181	2853753		573			JJB81_13890						flagellar phase variation DNA invertase Hin
Salmonella enterica subsp. enterica serovar Typhimurium - CP067397 (bases 2822320 to 2864091)	30862	31434	2853181	2853753		573			JJB81_13890
S Abony fla region grpE to tonB NZ_CP007534 extraction (bases 3 to 41771)	30867	31431	30869	31433		565			SEEA0014_RS00045						DNA-invertase
S Abony fla region grpE to tonB NZ_CP007534 extraction (bases 3 to 41771)	30867	31431	30869	31433		565			SEEA0014_RS00045
S Abony fla region grpE to tonB NZ_CP007534 extraction (bases 3 to 41771)	30874	30873	30876	30876	(T)6 -> (T)7	0	Insertion (tandem repeat)	DNA-invertase CDS	SEEA0014_RS00045	187		559	Frame Shift		DNA-invertase
S Abony fla region grpE to tonB NZ_CP007534 extraction (bases 3 to 41771)	30927	30926	30929	30929	(A)4 -> (A)5	0	Insertion (tandem repeat)	DNA-invertase CDS	SEEA0014_RS00045	169		506	Frame Shift		DNA-invertase
S Abony fla region grpE to tonB NZ_CP007534 extraction (bases 3 to 41771)	31115	31114	31117	31117	(A)5 -> (A)6	0	Insertion (tandem repeat)	DNA-invertase CDS	SEEA0014_RS00045	106		318	Frame Shift		DNA-invertase
S Abony fla region grpE to tonB NZ_CP007534 extraction (bases 3 to 41771)	31833	32015	31835	32017		183			SEEA0014_RS23040						hypothetical protein
S Abony fla region grpE to tonB NZ_CP007534 extraction (bases 3 to 41771)	31833	32015	31835	32017		183			SEEA0014_RS23040
Salmonella enterica subsp. enterica serovar Typhimurium - CP067397 (bases 2822320 to 2864091)	32123	33238	2854442	2855557		1116			JJB81_13895						salmochelin biosynthesis C-glycosyltransferase IroB
Salmonella enterica subsp. enterica serovar Typhimurium - CP067397 (bases 2822320 to 2864091)	32123	33238	2854442	2855557		1116			JJB81_13895
S Abony fla region grpE to tonB NZ_CP007534 extraction (bases 3 to 41771)	32120	33235	32122	33237		1116			SEEA0014_RS00050						DUF1205 domain-containing protein
S Abony fla region grpE to tonB NZ_CP007534 extraction (bases 3 to 41771)	32120	33235	32122	33237		1116			SEEA0014_RS00050
Salmonella enterica subsp. enterica serovar Typhimurium - CP067397 (bases 2822320 to 2864091)	33319	36975	2855638	2859294		3657			JJB81_13900						salmochelin/enterobactin export ABC transporter IroC
Salmonella enterica subsp. enterica serovar Typhimurium - CP067397 (bases 2822320 to 2864091)	33319	36975	2855638	2859294		3657			JJB81_13900
S Abony fla region grpE to tonB NZ_CP007534 extraction (bases 3 to 41771)	33316	36972	33318	36974		3657			SEEA0014_RS00055						ABC transporter ATP-binding protein
S Abony fla region grpE to tonB NZ_CP007534 extraction (bases 3 to 41771)	33316	36972	33318	36974		3657			SEEA0014_RS00055
Salmonella enterica subsp. enterica serovar Typhimurium - CP067397 (bases 2822320 to 2864091)	37085	38329	2859404	2860648		1245			JJB81_13905						esterase family protein
Salmonella enterica subsp. enterica serovar Typhimurium - CP067397 (bases 2822320 to 2864091)	37085	38329	2859404	2860648		1245			JJB81_13905
S Abony fla region grpE to tonB NZ_CP007534 extraction (bases 3 to 41771)	37082	38326	37084	38328		1245			SEEA0014_RS00060						esterase family protein
S Abony fla region grpE to tonB NZ_CP007534 extraction (bases 3 to 41771)	37082	38326	37084	38328		1245			SEEA0014_RS00060
Salmonella enterica subsp. enterica serovar Typhimurium - CP067397 (bases 2822320 to 2864091)	38361	39296	2860680	2861615		936			JJB81_13910						alpha/beta hydrolase
Salmonella enterica subsp. enterica serovar Typhimurium - CP067397 (bases 2822320 to 2864091)	38361	39296	2860680	2861615		936			JJB81_13910
S Abony fla region grpE to tonB NZ_CP007534 extraction (bases 3 to 41771)	38358	39293	38360	39295		936			SEEA0014_RS00065						alpha/beta hydrolase
S Abony fla region grpE to tonB NZ_CP007534 extraction (bases 3 to 41771)	38358	39293	38360	39295		936			SEEA0014_RS00065
Salmonella enterica subsp. enterica serovar Typhimurium - CP067397 (bases 2822320 to 2864091)	39338	41518	2861657	2863837		2181			JJB81_13915						TonB-dependent siderophore receptor
Salmonella enterica subsp. enterica serovar Typhimurium - CP067397 (bases 2822320 to 2864091)	39338	41518	2861657	2863837		2181			JJB81_13915
S Abony fla region grpE to tonB NZ_CP007534 extraction (bases 3 to 41771)	39335	41515	39337	41517		2181			SEEA0014_RS00070						TonB-dependent siderophore receptor
S Abony fla region grpE to tonB NZ_CP007534 extraction (bases 3 to 41771)	39335	41515	39337	41517		2181			SEEA0014_RS00070
S Abony fla region grpE to tonB NZ_CP007534 extraction (bases 3 to 41771)	40979	40979	40981	40981	A -> G	1	SNP (transition)	TonB-dependent siderophore receptor CDS	SEEA0014_RS00070	179	GGT -> GGC	537	None		TonB-dependent siderophore receptor
S Abony fla region grpE to tonB NZ_CP007534 extraction (bases 3 to 41771)	40982	40982	40984	40984	A -> G	1	SNP (transition)	TonB-dependent siderophore receptor CDS	SEEA0014_RS00070	178	CAT -> CAC	534	None		TonB-dependent siderophore receptor
S Abony fla region grpE to tonB NZ_CP007534 extraction (bases 3 to 41771)	41055	41055	41057	41057	G -> A	1	SNP (transition)	TonB-dependent siderophore receptor CDS	SEEA0014_RS00070	154	GCC -> GTC	461	Substitution	A -> V	TonB-dependent siderophore receptor
S Abony fla region grpE to tonB NZ_CP007534 extraction (bases 3 to 41771)	41165	41165	41167	41167	T -> C	1	SNP (transition)	TonB-dependent siderophore receptor CDS	SEEA0014_RS00070	117	TCA -> TCG	351	None		TonB-dependent siderophore receptor

## Sheet: Seg 5 LT2 vs STK005 align extr3
Sequence Name	Minimum	Maximum	Min (original sequence)	Max (original sequence)	Length	locus_tag	Name	Polymorphism Type	Change	CDS	Protein Effect	CDS Codon Number	Amino Acid Change	product	note
Salmonella enterica subsp. enterica serovar Typhimurium str. LT2 - NC_003197.2 (bases 1 to 4857450) extraction	3	3	2926018	2926018	1		G	SNP (transition)	A -> G
Salmonella enterica subsp. enterica serovar Typhimurium str. LT2 - NC_003197.2 (bases 1 to 4857450) extraction	23	23	2926038	2926038	1		G	SNP (transition)	A -> G
Salmonella enterica subsp. enterica serovar Typhimurium str. LT2 - NC_003197.2 (bases 1 to 4857450) extraction	50	50	2926065	2926065	1		A	SNP (transition)	G -> A
Salmonella enterica subsp. enterica serovar Typhimurium str. LT2 - NC_003197.2 (bases 1 to 4857450) extraction	52	52	2926067	2926067	1		G	SNP (transversion)	T -> G
Salmonella enterica subsp. enterica serovar Typhimurium str. LT2 - NC_003197.2 (bases 1 to 4857450) extraction	60	60	2926075	2926075	1		G	SNP (transversion)	C -> G
Salmonella enterica subsp. enterica serovar Typhimurium str. LT2 - NC_003197.2 (bases 1 to 4857450) extraction	71	71	2926086	2926086	1		A	SNP (transversion)	C -> A
Salmonella enterica subsp. enterica serovar Typhimurium str. LT2 - NC_003197.2 (bases 1 to 4857450) extraction	77	77	2926092	2926092	1		A	SNP (transversion)	T -> A
Salmonella enterica subsp. enterica serovar Typhimurium str. LT2 - NC_003197.2 (bases 1 to 4857450) extraction	80	80	2926095	2926095	1		A	SNP (transition)	G -> A
Salmonella enterica subsp. enterica serovar Typhimurium str. LT2 - NC_003197.2 (bases 1 to 4857450) extraction	91	91	2926106	2926106	1		G	SNP (transition)	A -> G
Salmonella enterica subsp. enterica serovar Typhimurium str. LT2 - NC_003197.2 (bases 1 to 4857450) extraction	100	100	2926115	2926115	1		A	SNP (transition)	G -> A
Salmonella enterica subsp. enterica serovar Typhimurium str. LT2 - NC_003197.2 (bases 1 to 4857450) extraction	103	103	2926118	2926118	1		C	SNP (transition)	T -> C
Salmonella enterica subsp. enterica serovar Typhimurium str. LT2 - NC_003197.2 (bases 1 to 4857450) extraction	106	106	2926121	2926121	1		T	SNP (transition)	C -> T
Salmonella enterica subsp. enterica serovar Typhimurium str. LT2 - NC_003197.2 (bases 1 to 4857450) extraction	109	109	2926124	2926124	1		G	SNP (transversion)	C -> G
Salmonella enterica subsp. enterica serovar Typhimurium str. LT2 - NC_003197.2 (bases 1 to 4857450) extraction	133	133	2926148	2926148	1		G	SNP (transition)	A -> G
Salmonella enterica subsp. enterica serovar Typhimurium str. LT2 - NC_003197.2 (bases 1 to 4857450) extraction	151	151	2926166	2926166	1		A	SNP (transversion)	C -> A
Salmonella enterica subsp. enterica serovar Typhimurium str. LT2 - NC_003197.2 (bases 1 to 4857450) extraction	153	153	2926168	2926168	1		G	SNP (transition)	A -> G
Salmonella enterica subsp. enterica serovar Typhimurium str. LT2 - NC_003197.2 (bases 1 to 4857450) extraction	163	163	2926178	2926178	1		A	SNP (transversion)	T -> A
Salmonella enterica subsp. enterica serovar Typhimurium str. LT2 - NC_003197.2 (bases 1 to 4857450) extraction	194	194	2926209	2926209	1		T	SNP (transition)	C -> T
Salmonella enterica subsp. enterica serovar Typhimurium str. LT2 - NC_003197.2 (bases 1 to 4857450) extraction	26811	26811	2952826	2952826	1	STM2807	C	SNP (transition)	T -> C	nrdE CDS	Substitution	114	L -> P	ribonucleotide-diphosphate reductase subunit alpha	ribonucleoside-diphosphate reductase 2 alpha chain.(SW:RIR3_SALTY)
Salmonella enterica subsp. enterica serovar Typhimurium str. LT2 - NC_003197.2 (bases 1 to 4857450) extraction	96128	96128	3022143	3022143	1	STM2878	T	SNP (transition)	C -> T	sptP CDS	Substitution	523	D -> N	pathogenicity island 1 effector protein StpP	protein tyrosine phosphatase SptP (gi|1519054)
Salmonella enterica subsp. enterica serovar Typhimurium str. LT2 - NC_003197.2 (bases 1 to 4857450) extraction	99579	99579	3025594	3025594	1	STM2882	T	SNP (transition)	C -> T	sipA CDS	Substitution	384	G -> R	pathogenicity island 1 effector protein SipA	SipA (gi|1172128)
Salmonella enterica subsp. enterica serovar Typhimurium str. LT2 - NC_003197.2 (bases 1 to 4857450) extraction	113057	113056	3039072	3039072	0	STM2896	C	Insertion (tandem repeat)	(C)5 -> (C)6	invA CDS	Frame Shift	465		EscV/YscV/HrcV family type III secretion system export apparatus protein	invasion protein INVA. (SW:INVA_SALTY)
Salmonella enterica subsp. enterica serovar Typhimurium str. LT2 - NC_003197.2 (bases 1 to 4857450) extraction	126614	126614	3052629	3052629	1	STM2909	A	SNP (transition)	G -> A	mutS CDS	Substitution	782	G -> S	DNA mismatch repair protein MutS	recognizes exocyclic adducts of guanosine; DNA mismatch repair protein MUTS. (SW:MUTS_SALTY)
Salmonella enterica subsp. enterica serovar Typhimurium str. LT2 - NC_003197.2 (bases 1 to 4857450) extraction	127574	127574	3053589	3053589	1	STM2911	A	SNP (transition)	G -> A	MFS transporter CDS	None	302		MFS transporter	similar to E. coli multidrug resistance; probably membrane translocase (AAC75733.1); Blastp hit to AAC75733.1 (512 aa), 29% identity in aa 15 - 201, 30% identity in aa 284 - 319
Salmonella enterica subsp. enterica serovar Typhimurium str. LT2 - NC_003197.2 (bases 1 to 4857450) extraction	139782	139782	3065797	3065797	1	STM2924	T	SNP (transition)	C -> T	rpoS CDS	Substitution	233	A -> T	RNA polymerase sigma factor RpoS	major sigmafactor during stationary phase; RNA polymerase sigma factor RPOS (sigma-38). (SW:RPOS_SALTY)
Salmonella enterica subsp. enterica serovar Typhimurium str. LT2 - NC_003197.2 (bases 1 to 4857450) extraction	171497	171497	3097512	3097512	1	STM2952	G	SNP (transition)	A -> G	eno CDS	None	386		phosphopyruvate hydratase	similar to E. coli enolase (AAC75821.1); Blastp hitto AAC75821.1 (432 aa), 98% identity in aa 1 - 432
Salmonella enterica subsp. enterica serovar Typhimurium str. LT2 - NC_003197.2 (bases 1 to 4857450) extraction	244112	244114	3170127	3170130	3		GAAATAAATATCCTCCGGCATAGCCGGAGGTTTTTCAGATGCGCCTATAAGGCTCTCTTACCAGCCGCGCCCTAACAGGCGCATACGATCTGACATTTGCATCAAACTTCGTTACTTACGGCCCGTAAACGGGCTGCCCGGATACGGGATCGATAATTGCTCACCCATTTTATCCTCTTCAAGCTGGTGCTTTATGTAGTCCTGTATCTTCGCCGTGTTCTTACCCACCGTATCGACATAGTACCCTCTGCACCAGAACTCCCTGTTCCTGTATTTGAATTTTAGATCCCCAAACTGCTCGTAAAGCATCAGACTACTTTTACCCTTCAGATATCCCATGAAACTCGACACACTCATCTTCGGCGGGATCTCCAGAAGCATGTGAATATGATCTGCACA…	Insertion	GAA -> GAAATAAATATCCTCCGGCATAGCCGGAGGTTTTTCAGATGCGCCTATAAGGCTCTCTTACCAGCCGCGCCCTAACAGGCGCATACGATCTGACATTTGCATCAAACTTCGTTACTTACGGCCCGTAAACGGGCTGCCCGGATACGGGATCGATAATTGCTCACCCATTTTATCCTCTTCAAGCTGGTGCTTTATGTAGTCCTGTATCTTCGCCGTGTTCTTACCCACCGTATCGACATAGTACCCTCTGCACCAGAACTCCCTGTTCCTGTATTTGAATTTTAGATCCCCAAACTGCTCGTAAAGCATCAGACTACTTTTACCCTTCAGATATCCCATGAAACTCGACACACTCATCTTCGGCGGGATCTCCAGAAGCATGTGAATATGAT…						this is an IS insertion; JJB81_15095
Salmonella enterica subsp. enterica serovar Typhimurium str. LT2 - NC_003197.2 (bases 1 to 4857450) extraction	257535	257535	3183550	3183550	1	STM3022	T	SNP (transition)	C -> T	transporter CDS	Substitution	341	S -> F	transporter	similar to E. coli putative transporter protein (AAC75884.1); Blastp hit to AAC75884.1 (409 aa), 90% identity in aa 1 - 408
Salmonella enterica subsp. enterica serovar Typhimurium str. LT2 - NC_003197.2 (bases 1 to 4857450) extraction	268202	268910	3194217	3194925	709		mobile element
Salmonella enterica subsp. enterica serovar Typhimurium str. LT2 - NC_003197.2 (bases 1 to 4857450) extraction	286455	286455	3212470	3212470	1	STM3053	A	SNP (transition)	G -> A	gcvP CDS	None	849		glycine cleavage system protein P	glycine decarboxylase; similar to E. coli glycine decarboxylase, P protein of glycine cleavage system (AAC75941.1); Blastp hit to AAC75941.1 (957 aa), 96% identity in aa 1 - 957
Salmonella enterica subsp. enterica serovar Typhimurium str. LT2 - NC_003197.2 (bases 1 to 4857450) extraction	327570	327570	3253585	3253585	1	STM3091	C	SNP (transition)	T -> C	galP CDS	None	80		MFS transporter	similar to E. coli galactose-proton symport of transport system (AAC75980.1); Blastp hit to AAC75980.1 (464 aa), 97% identity in aa 1 - 464
Salmonella enterica subsp. enterica serovar Typhimurium str. LT2 - NC_003197.2 (bases 1 to 4857450) extraction	337853	337853	3263868	3263868	1	STM3104	A	SNP (transversion)	C -> A	yggW CDS	Substitution	250	H -> N	YggW family oxidoreductase	similar to E. coli putative oxidase (AAC75992.1); Blastp hit to AAC75992.1 (378 aa), 92% identity in aa 1 - 378
Salmonella enterica subsp. enterica serovar Typhimurium str. LT2 - NC_003197.2 (bases 1 to 4857450) extraction	420806	420809	3346821	3346824	4	STM3183		Deletion	=-TGTC	icc CDS	Frame Shift	158		3',5'-cyclic-AMP phosphodiesterase	similar to E. coli regulator of lacZ (AAC76068.1); Blastp hit to AAC76068.1 (275 aa), 92% identity in aa 1 - 275
Salmonella enterica subsp. enterica serovar Typhimurium str. LT2 - NC_003197.2 (bases 1 to 4857450) extraction	437411	437411	3363426	3363426	1	STM3200	A	SNP (transition)	G -> A	rfaE CDS	None	192		bifunctional heptose 7-phosphate kinase/heptose 1-phosphate adenyltransferase	bifunctional; similar to E. coli putative kinase (AAC76088.1); Blastp hit to AAC76088.1 (477 aa), 93% identity in aa 1 - 476
Salmonella enterica subsp. enterica serovar Typhimurium str. LT2 - NC_003197.2 (bases 1 to 4857450) extraction	446115	446115	3372130	3372130	1	STM3207	A	SNP (transition)	G -> A	ygiH CDS	Substitution	58	V -> I	acyl-phosphate--glycerol-3-phosphate O-acyltransferase	similar to E. coli orf, hypothetical protein (AAC76095.1); Blastp hit to AAC76095.1 (205 aa), 95% identity in aa 1 - 203
Salmonella enterica subsp. enterica serovar Typhimurium str. LT2 - NC_003197.2 (bases 1 to 4857450) extraction	447273	447273	3373288	3373288	1	STM3208	A	SNP (transition)	G -> A	gcp CDS	None	183		tRNA threonylcarbamoyl adenosine modification protein TsaD	probable O-sialoglycoprotein endopeptidase. (SW:GCP_SALTY)
Salmonella enterica subsp. enterica serovar Typhimurium str. LT2 - NC_003197.2 (bases 1 to 4857450) extraction	452820	452820	3378835	3378835	1	STM3212	A	SNP (transition)	G -> A	mug CDS	None	17		double-stranded uracil-DNA glycosylase	similar to E. coli orf, hypothetical protein (AAC76104.1); Blastp hit to AAC76104.1 (168 aa), 80% identity in aa 1 - 167
Salmonella enterica subsp. enterica serovar Typhimurium str. LT2 - NC_003197.2 (bases 1 to 4857450) extraction	455075	455075	3381090	3381090	1	STM3216	A	SNP (transition)	G -> A	putative methyl-accepting chemotaxis protein CDS	Substitution	429	H -> Y	putative methyl-accepting chemotaxis protein	similar to E. coli methyl-accepting chemotaxis protein I, serine sensor receptor (AAC77311.1); Blastp hit to AAC77311.1 (551 aa), 36% identity in aa 2 - 523
Salmonella enterica subsp. enterica serovar Typhimurium str. LT2 - NC_003197.2 (bases 1 to 4857450) extraction	456211	456211	3382226	3382226	1	STM3216	A	SNP (transition)	G -> A	putative methyl-accepting chemotaxis protein CDS	Substitution	50	P -> L	putative methyl-accepting chemotaxis protein	similar to E. coli methyl-accepting chemotaxis protein I, serine sensor receptor (AAC77311.1); Blastp hit to AAC77311.1 (551 aa), 36% identity in aa 2 - 523
Salmonella enterica subsp. enterica serovar Typhimurium str. LT2 - NC_003197.2 (bases 1 to 4857450) extraction	458163	458163	3384178	3384178	1	STM3217	A	SNP (transition)	G -> A	aer CDS	None	35		hypothetical protein	senses cellular redox state or proton motive force;similar to E. coli aerotaxis sensor receptor, flavoprotein(AAC76107.1); Blastp hit to AAC76107.1 (506 aa), 83%identity in aa 1 - 506
Salmonella enterica subsp. enterica serovar Typhimurium str. LT2 - NC_003197.2 (bases 1 to 4857450) extraction	458871	458871	3384886	3384886	1	STM3218	A	SNP (transition)	G -> A	oat CDS	Substitution	29	A -> T	putative acetylornithine aminotransferase	similar to E. coli probable ornithine aminotransferase (AAC76108.1); Blastp hit to AAC76108.1 (496 aa), 94% identity in aa 68 - 495
Salmonella enterica subsp. enterica serovar Typhimurium str. LT2 - NC_003197.2 (bases 1 to 4857450) extraction	461590	461590	3387605	3387605	1	STM3219	A	SNP (transition)	G -> A	fadH CDS	None	448		NADPH-dependent 2,4-dienoyl-CoA reductase	similar to E. coli putative NADPH dehydrogenase (AAC76116.1); Blastp hit to AAC76116.1 (672 aa), 85% identity in aa 1 - 672
Salmonella enterica subsp. enterica serovar Typhimurium str. LT2 - NC_003197.2 (bases 1 to 4857450) extraction	466852	466852	3392867	3392867	1	STM3224	A	SNP (transition)	G -> A	ygjT CDS	Substitution	195	R -> H	hypothetical protein	similar to E. coli putative transport protein (AAC76123.1); Blastp hit to AAC76123.1 (321 aa), 87% identity in aa 1 - 318
Salmonella enterica subsp. enterica serovar Typhimurium str. LT2 - NC_003197.2 (bases 1 to 4857450) extraction	467600	467600	3393615	3393615	1	STM3225	T	SNP (transversion)	A -> T	ygjU CDS	Truncation	37		serine/threonine transporter SstT	similar to E. coli putative transport protein (AAC76124.1); Blastp hit to AAC76124.1 (414 aa), 93% identity in aa 1 - 414
Salmonella enterica subsp. enterica serovar Typhimurium str. LT2 - NC_003197.2 (bases 1 to 4857450) extraction	467631	467631	3393646	3393646	1	STM3225	A	SNP (transition)	G -> A	ygjU CDS	Substitution	47	G -> D	serine/threonine transporter SstT	similar to E. coli putative transport protein (AAC76124.1); Blastp hit to AAC76124.1 (414 aa), 93% identity in aa 1 - 414
Salmonella enterica subsp. enterica serovar Typhimurium str. LT2 - NC_003197.2 (bases 1 to 4857450) extraction	468647	468647	3394662	3394662	1	STM3225	A	SNP (transition)	G -> A	ygjU CDS	Substitution	386	A -> T	serine/threonine transporter SstT	similar to E. coli putative transport protein (AAC76124.1); Blastp hit to AAC76124.1 (414 aa), 93% identity in aa 1 - 414
Salmonella enterica subsp. enterica serovar Typhimurium str. LT2 - NC_003197.2 (bases 1 to 4857450) extraction	468868	468868	3394883	3394883	1		A	SNP (transition)	G -> A
Salmonella enterica subsp. enterica serovar Typhimurium str. LT2 - NC_003197.2 (bases 1 to 4857450) extraction	468929	468929	3394944	3394944	1		A	SNP (transition)	G -> A
Salmonella enterica subsp. enterica serovar Typhimurium str. LT2 - NC_003197.2 (bases 1 to 4857450) extraction	473748	473748	3399763	3399763	1	STM3234	A	SNP (transition)	G -> A	yhaH CDS	Substitution	50	G -> E	hypothetical protein	similar to E. coli putative cytochrome (AAC76138.1); Blastp hit to AAC76138.1 (121 aa), 89% identity in aa 1 - 118
Salmonella enterica subsp. enterica serovar Typhimurium str. LT2 - NC_003197.2 (bases 1 to 4857450) extraction	499480	499480	3425495	3425495	1	STM3255	A	SNP (transition)	G -> A	PTS fructose transporter subunit IIC CDS	Substitution	360	E -> K	PTS fructose transporter subunit IIC	similar to E. coli PTS system, fructose-specific transport protein (AAC75228.1); Blastp hit to AAC75228.1 (563 aa), 42% identity in aa 104 - 562, 32% identity in aa 2 - 41
Salmonella enterica subsp. enterica serovar Typhimurium str. LT2 - NC_003197.2 (bases 1 to 4857450) extraction	512450	512450	3438465	3438465	1	STM3270	T	SNP (transition)	C -> T	yhbP CDS	Substitution	79	G -> D	hypothetical protein	similar to E. coli orf, hypothetical protein (AAC76188.1); Blastp hit to AAC76188.1 (147 aa), 83% identity in aa 1 - 147
Salmonella enterica subsp. enterica serovar Typhimurium str. LT2 - NC_003197.2 (bases 1 to 4857450) extraction	513960	513960	3439975	3439975	1	STM3273	T	SNP (transition)	C -> T	yhbT CDS	Substitution	30	R -> H	hypothetical protein	similar to E. coli orf, hypothetical protein (AAC76191.1); Blastp hit to AAC76191.1 (174 aa), 90% identity in aa 1 - 174
Salmonella enterica subsp. enterica serovar Typhimurium str. LT2 - NC_003197.2 (bases 1 to 4857450) extraction	538400	538400	3464415	3464415	1	STM3295		Deletion (tandem repeat)	(C)8 -> (C)7	folP CDS	Frame Shift	60		dihydropteroate synthase	similar to E. coli 7,8-dihydropteroate synthase (AAC76209.1); Blastp hit to AAC76209.1 (297 aa), 91% identity in aa 16 - 297
Salmonella enterica subsp. enterica serovar Typhimurium str. LT2 - NC_003197.2 (bases 1 to 4857450) extraction	564462	564462	3490477	3490477	1		A	SNP (transition)	G -> A
Salmonella enterica subsp. enterica serovar Typhimurium str. LT2 - NC_003197.2 (bases 1 to 4857450) extraction	640247	640247	3566262	3566262	1		A	SNP (transition)	G -> A
Salmonella enterica subsp. enterica serovar Typhimurium str. LT2 - NC_003197.2 (bases 1 to 4857450) extraction	640614	640735	3566629	3566750	122	STM3393	rrfF rRNA							5S ribosomal RNA
Salmonella enterica subsp. enterica serovar Typhimurium - CP067397 (bases 1 to 4796208) extraction	641326	641441	3505405	3505520	116	JJB81_17040	rrf rRNA							5S ribosomal RNA	Derived by automated computational analysis using gene prediction method: cmsearch.
Salmonella enterica subsp. enterica serovar Typhimurium str. LT2 - NC_003197.2 (bases 1 to 4857450) extraction	640702	640702	3566717	3566717	1		A	SNP (transition)	G -> A
Salmonella enterica subsp. enterica serovar Typhimurium str. LT2 - NC_003197.2 (bases 1 to 4857450) extraction	640859	640980	3566874	3566995	122	STM3395	rrfD rRNA							rRNA
Salmonella enterica subsp. enterica serovar Typhimurium - CP067397 (bases 1 to 4796208) extraction	641571	641686	3505650	3505765	116	JJB81_17050	rrf rRNA							5S ribosomal RNA	Derived by automated computational analysis using gene prediction method: cmsearch.
Salmonella enterica subsp. enterica serovar Typhimurium str. LT2 - NC_003197.2 (bases 1 to 4857450) extraction	641070	644063	3567085	3570078	2994	STM3396	rrlD rRNA							23S ribosomal RNA
Salmonella enterica subsp. enterica serovar Typhimurium - CP067397 (bases 1 to 4796208) extraction	641780	644771	3505859	3508850	2992	JJB81_17055	23S rRNA							23S ribosomal RNA	Derived by automated computational analysis using gene prediction method: cmsearch.
Salmonella enterica subsp. enterica serovar Typhimurium str. LT2 - NC_003197.2 (bases 1 to 4857450) extraction	642321	642321	3568336	3568336	1		A	SNP (transition)	G -> A
Salmonella enterica subsp. enterica serovar Typhimurium str. LT2 - NC_003197.2 (bases 1 to 4857450) extraction	644455	645998	3570470	3572013	1544	STM3398	rrsD rRNA							16S ribosomal RNA
Salmonella enterica subsp. enterica serovar Typhimurium - CP067397 (bases 1 to 4796208) extraction	645165	646706	3509244	3510785	1542	JJB81_17065	16S rRNA							16S ribosomal RNA	Derived by automated computational analysis using gene prediction method: cmsearch.
Salmonella enterica subsp. enterica serovar Typhimurium str. LT2 - NC_003197.2 (bases 1 to 4857450) extraction	647408	647408	3573423	3573423	1	STM3401	A	SNP (transition)	G -> A	aroE CDS	None	223		shikimate dehydrogenase	similar to E. coli dehydroshikimate reductase (AAC76306.1); Blastp hit to AAC76306.1 (272 aa), 85% identity in aa 1 - 272
Salmonella enterica subsp. enterica serovar Typhimurium str. LT2 - NC_003197.2 (bases 1 to 4857450) extraction	676574	676574	3602589	3602589	1	STM3448	C	SNP (transition)	T -> C	rpsL CDS	Substitution	43	K -> R	30S ribosomal protein S12	30S ribosomal protein S12. (SW:RS12_ECOLI)
Salmonella enterica subsp. enterica serovar Typhimurium str. LT2 - NC_003197.2 (bases 1 to 4857450) extraction	679264	679264	3605279	3605279	1	STM3453	T	SNP (transition)	C -> T	fkpA CDS	Substitution	140	G -> S	FKBP-type peptidyl-prolyl cis-trans isomerase FkpA	similar to E. coli FKBP-type peptidyl-prolyl cis-trans isomerase (rotamase) (AAC76372.1); Blastp hit to AAC76372.1 (270 aa), 90% identity in aa 1 - 270
Salmonella enterica subsp. enterica serovar Typhimurium str. LT2 - NC_003197.2 (bases 1 to 4857450) extraction	685227	685227	3611242	3611242	1	STM3459	T	SNP (transition)	C -> T	yheS CDS	Substitution	468	A -> V	ABC transporter ATP-binding protein	contains duplicated ATPase domain; similar to E. coli putative ATP-binding component of a transport system (AAC76377.1); Blastp hit to AAC76377.1 (637 aa), 93% identity in aa 1 - 631
Salmonella enterica subsp. enterica serovar Typhimurium str. LT2 - NC_003197.2 (bases 1 to 4857450) extraction	689839	689839	3615854	3615854	1	STM3466	A	SNP (transition)	G -> A	crp CDS	Substitution	68	G -> S	transcriptional regulator Crp	catabolite gene activator (CAMP receptor protein) (CAMP-regulatoryprotein). (SW:CRP_SALTY)
Salmonella enterica subsp. enterica serovar Typhimurium str. LT2 - NC_003197.2 (bases 1 to 4857450) extraction	693490	693490	3619505	3619505	1	STM3468	A	SNP (transition)	G -> A	argD CDS	None	59		bifunctional succinylornithine transaminase/acetylornithine transaminase	NAcOATase and DapATase; similar to E. coli acetylornithine delta-aminotransferase (AAC76384.1); Blastp hit to AAC76384.1 (406 aa), 91% identity in aa 1 - 404
Salmonella enterica subsp. enterica serovar Typhimurium str. LT2 - NC_003197.2 (bases 1 to 4857450) extraction	694310	694310	3620325	3620325	1	STM3469	A	SNP (transition)	G -> A	pabA CDS	None	2		aminodeoxychorismate synthase component II	para-aminobenzoate synthase glutamine amidotransferase component II. (SW:PABA_SALTY)
Salmonella enterica subsp. enterica serovar Typhimurium str. LT2 - NC_003197.2 (bases 1 to 4857450) extraction	709046	709754	3635061	3635769	709		mobile element
Salmonella enterica subsp. enterica serovar Typhimurium str. LT2 - NC_003197.2 (bases 1 to 4857450) extraction	736558	736558	3662573	3662573	1	STM3504	T	SNP (transition)	C -> T	yhgF CDS	None	479		putative RNase R	similar to E. coli orf, hypothetical protein (AAC76432.1); Blastp hit to AAC76432.1 (740 aa), 94% identity in aa 1 - 740
Salmonella enterica subsp. enterica serovar Typhimurium str. LT2 - NC_003197.2 (bases 1 to 4857450) extraction	808759	808759	3734774	3734774	1	STM3567	G	SNP (transversion)	T -> G	livJ CDS	Substitution	280	K -> Q	high-affinity branched-chain amino acid transporter	ABC superfamily (bind_prot); leu/ile/val/thr-binding protein precursor (LIVT-BP). (SW:LIVJ_SALTY)
Salmonella enterica subsp. enterica serovar Typhimurium str. LT2 - NC_003197.2 (bases 1 to 4857450) extraction	835267	835267	3761282	3761282	1	STM3591	C	SNP (transition)	T -> C	uspA CDS	Substitution	139	L -> P	universal stress global response regulator UspA	similar to E. coli universal stress protein; broad regulatory function? (AAC76520.1); Blastp hit to AAC76520.1 (144 aa), 99% identity in aa 1 - 144
Salmonella enterica subsp. enterica serovar Typhimurium str. LT2 - NC_003197.2 (bases 1 to 4857450) extraction	867256	867256	3793271	3793271	1	STM3615	A	SNP (transition)	G -> A	yhjK CDS	None	143		putative diguanylate cyclase/phosphodiesterase	similar to E. coli orf, hypothetical protein (AAC76554.1); Blastp hit to AAC76554.1 (651 aa), 84% identity in aa 1 - 651
Salmonella enterica subsp. enterica serovar Typhimurium str. LT2 - NC_003197.2 (bases 1 to 4857450) extraction	890198	890198	3816213	3816213	1		T	SNP (transversion)	A -> T
Salmonella enterica subsp. enterica serovar Typhimurium str. LT2 - NC_003197.2 (bases 1 to 4857450) extraction	922393	922393	3848408	3848408	1	STM3662	A	SNP (transition)	G -> A	xylR CDS	Substitution	82	G -> E	XylR family transcriptional regulator	AraC/XylS family; similar to E. coli putative regulator of xyl operon (AAC76593.1); Blastp hit to AAC76593.1 (392 aa), 92% identity in aa 1 - 392
Salmonella enterica subsp. enterica serovar Typhimurium str. LT2 - NC_003197.2 (bases 1 to 4857450) extraction	1016753	1016753	3942768	3942768	1		A	SNP (transition)	G -> A
Salmonella enterica subsp. enterica serovar Typhimurium str. LT2 - NC_003197.2 (bases 1 to 4857450) extraction	1033190	1033190	3959205	3959205	1	STM3760	T	SNP (transition)	C -> T	putative cytoplasmic protein CDS	Substitution	10	G -> E	putative cytoplasmic protein	Pathogenicity island encoded protein: SPI3
Salmonella enterica subsp. enterica serovar Typhimurium - CP067397 (bases 1 to 4796208) extraction	1085027	1085100	3949106	3949179	74		misc								ROSE (Repression Of Heat Shock gene Expression) occurs in the 5'-region of heat shock genes and acts as an RNA thermometer to modulate expression; Derived by automated computational analysis using gene prediction method: cmsearch.
Salmonella enterica subsp. enterica serovar Typhimurium str. LT2 - NC_003197.2 (bases 1 to 4857450) extraction	1086243	1086243	4012258	4012258	1		A	SNP (transition)	G -> A
Salmonella enterica subsp. enterica serovar Typhimurium str. LT2 - NC_003197.2 (bases 1 to 4857450) extraction	1088801	1088801	4014816	4014816	1	STM3814	T	SNP (transition)	C -> T	ccmF CDS	Substitution	348	R -> H	c-type cytochrome biogenesis protein CcmF	similar to E. coli cytochrome c-type biogenesis protein (AAC75256.1); Blastp hit to AAC75256.1 (647 aa), 85% identity in aa 1 - 646
Salmonella enterica subsp. enterica serovar Typhimurium str. LT2 - NC_003197.2 (bases 1 to 4857450) extraction	1090002	1090002	4016017	4016017	1	STM3815	T	SNP (transition)	C -> T	ccmE CDS	None	106		cytochrome c biogenesis protein CcmE	cytochrome c-type biogenesis protein; similar to E.coli cytochrome c biogenesis, possible subunit of a hemelyase (AAC75257.1); Blastp hit to AAC75257.1 (159 aa), 82%identity in aa 1 - 159
Salmonella enterica subsp. enterica serovar Typhimurium str. LT2 - NC_003197.2 (bases 1 to 4857450) extraction	1098289	1098289	4024304	4024304	1	STM3823	A	SNP (transition)	G -> A	torC CDS	None	82		trimethylamine N-oxide reductase cytochrome c-type subunit	cytochrome c-type subunit; also has activity as negativer regulator of tor operon; similar to E. coli trimethylamine N-oxide reductase, cytochrome c-type subunit (AAC74081.1); Blastp hit to AAC74081.1 (390 aa), 90% identity in aa 1 - 388
Salmonella enterica subsp. enterica serovar Typhimurium str. LT2 - NC_003197.2 (bases 1 to 4857450) extraction	1100531	1100531	4026546	4026546	1	STM3826	A	SNP (transition)	G -> A	torS CDS	Substitution	28	G -> D	TMAO reductase system sensor histidine kinase/response regulator TorS	regulates tor operon; similar to E. coli sensor protein torS (regulator TorR) (AAC74078.1); Blastp hit to AAC74078.1 (904 aa), 62% identity in aa 1 - 896
Salmonella enterica subsp. enterica serovar Typhimurium str. LT2 - NC_003197.2 (bases 1 to 4857450) extraction	1112761	1112761	4038776	4038776	1	STM3834	T	SNP (transition)	C -> T	putative LysR family transcriptional regulator CDS	Substitution	275	A -> V	putative LysR family transcriptional regulator	similar to E. coli putative transcriptional regulator LYSR-type (AAC73855.1); Blastp hit to AAC73855.1 (338 aa), 27% identity in aa 22 - 318
Salmonella enterica subsp. enterica serovar Typhimurium str. LT2 - NC_003197.2 (bases 1 to 4857450) extraction	1117418	1117418	4043433	4043433	1	STM3837	A	SNP (transition)	G -> A	dnaN CDS	Substitution	67	A -> V	DNA polymerase III subunit beta	DNA polymerase iii, beta chain. (SW:DP3B_SALTY)
Salmonella enterica subsp. enterica serovar Typhimurium str. LT2 - NC_003197.2 (bases 1 to 4857450) extraction	1123518	1123518	4049533	4049533	1	STM3843	A	SNP (transition)	G -> A	trmE CDS	None	436		tRNA uridine-5-carboxymethylaminomethyl(34) synthesis GTPase MnmE	similar to E. coli GTP-binding protein in thiopheneand furan oxidation (AAC76729.1); Blastp hit to AAC76729.1(454 aa), 94% identity in aa 1 - 454
Salmonella enterica subsp. enterica serovar Typhimurium str. LT2 - NC_003197.2 (bases 1 to 4857450) extraction	1133230	1133230	4059245	4059245	1		A	SNP (transition)	G -> A
Salmonella enterica subsp. enterica serovar Typhimurium str. LT2 - NC_003197.2 (bases 1 to 4857450) extraction	1141280	1141280	4067295	4067295	1	STM3860	A	SNP (transition)	G -> A	SgrR family transcriptional regulator CDS	Truncation	52		SgrR family transcriptional regulator	periplasmic component; similar to E. coli putative transport protein (AAC73180.1); Blastp hit to AAC73180.1 (551 aa), 49% identity in aa 1 - 309, 29% identity in aa 297 - 548
Salmonella enterica subsp. enterica serovar Typhimurium str. LT2 - NC_003197.2 (bases 1 to 4857450) extraction	1146033	1146033	4072048	4072048	1	STM3862	A	SNP (transition)	G -> A	glmU CDS	Substitution	130	T -> I	UDP-N-acetylglucosamine diphosphorylase/glucosamine-1-phosphate N-acetyltransferase	similar to E. coli N-acetyl glucosamine-1-phosphateuridyltransferase (AAC76753.1); Blastp hit to AAC76753.1(456 aa), 91% identity in aa 1 - 456
Salmonella enterica subsp. enterica serovar Typhimurium str. LT2 - NC_003197.2 (bases 1 to 4857450) extraction	1148189	1148189	4074204	4074204	1	STM3865	T	SNP (transition)	C -> T	atpD CDS	Substitution	435	E -> K	F0F1 ATP synthase subunit beta	similar to E. coli membrane-bound ATP synthase, F1 sector, beta-subunit (AAC76755.1); Blastp hit to AAC76755.1 (460 aa), 99% identity in aa 1 - 460
Salmonella enterica subsp. enterica serovar Typhimurium str. LT2 - NC_003197.2 (bases 1 to 4857450) extraction	1149814	1149814	4075829	4075829	1	STM3866	A	SNP (transition)	G -> A	atpG CDS	Substitution	190	P -> S	F0F1 ATP synthase subunit gamma	similar to E. coli membrane-bound ATP synthase, F1 sector, gamma-subunit (AAC76756.1); Blastp hit to AAC76756.1 (287 aa), 96% identity in aa 1 - 287
Salmonella enterica subsp. enterica serovar Typhimurium str. LT2 - NC_003197.2 (bases 1 to 4857450) extraction	1150911	1150911	4076926	4076926	1	STM3867	A	SNP (transition)	G -> A	atpA CDS	None	355		F0F1 ATP synthase subunit alpha	similar to E. coli membrane-bound ATP synthase, F1 sector, alpha-subunit (AAC76757.1); Blastp hit to AAC76757.1 (513 aa), 98% identity in aa 1 - 513
Salmonella enterica subsp. enterica serovar Typhimurium str. LT2 - NC_003197.2 (bases 1 to 4857450) extraction	1155081	1155081	4081096	4081096	1		A	SNP (transition)	G -> A
Salmonella enterica subsp. enterica serovar Typhimurium str. LT2 - NC_003197.2 (bases 1 to 4857450) extraction	1161501	1161501	4087516	4087516	1	STM3878	A	SNP (transition)	G -> A	yieM CDS	Substitution	76	T -> I	putative inner membrane protein	similar to E. coli orf, hypothetical protein (AAC76768.1); Blastp hit to AAC76768.1 (427 aa), 89% identity in aa 1 - 427
Salmonella enterica subsp. enterica serovar Typhimurium str. LT2 - NC_003197.2 (bases 1 to 4857450) extraction	1174130	1175673	4100145	4101688	1544	STM3889	rrsC rRNA							16S ribosomal RNA
Salmonella enterica subsp. enterica serovar Typhimurium - CP067397 (bases 1 to 4796208) extraction	1174837	1176378	4038916	4040457	1542	JJB81_19570	16S rRNA							16S ribosomal RNA	Derived by automated computational analysis using gene prediction method: cmsearch.
Salmonella enterica subsp. enterica serovar Typhimurium str. LT2 - NC_003197.2 (bases 1 to 4857450) extraction	1174685	1174685	4100700	4100700	1		T	SNP (transition)	C -> T
Salmonella enterica subsp. enterica serovar Typhimurium str. LT2 - NC_003197.2 (bases 1 to 4857450) extraction	1176026	1179019	4102041	4105034	2994	STM3891	rrlC rRNA							23S ribosomal RNA
Salmonella enterica subsp. enterica serovar Typhimurium - CP067397 (bases 1 to 4796208) extraction	1176733	1179724	4040812	4043803	2992	JJB81_19580	23S rRNA							23S ribosomal RNA	Derived by automated computational analysis using gene prediction method: cmsearch.
Salmonella enterica subsp. enterica serovar Typhimurium str. LT2 - NC_003197.2 (bases 1 to 4857450) extraction	1177837	1177837	4103852	4103852	1		A	SNP (transition)	G -> A
Salmonella enterica subsp. enterica serovar Typhimurium str. LT2 - NC_003197.2 (bases 1 to 4857450) extraction	1179109	1179228	4105124	4105243	120	STM3894	rrfC rRNA							5S ribosomal RNA
Salmonella enterica subsp. enterica serovar Typhimurium - CP067397 (bases 1 to 4796208) extraction	1179818	1179933	4043897	4044012	116	JJB81_19585	rrf rRNA							5S ribosomal RNA	Derived by automated computational analysis using gene prediction method: cmsearch.
Salmonella enterica subsp. enterica serovar Typhimurium str. LT2 - NC_003197.2 (bases 1 to 4857450) extraction	1191792	1191792	4117807	4117807	1	STM3909	A	SNP (transition)	G -> A	ilvC CDS	Substitution	140	G -> S	ketol-acid reductoisomerase	ketol-acid reductoisomerase. (SW:ILVC_SALTY)
Salmonella enterica subsp. enterica serovar Typhimurium str. LT2 - NC_003197.2 (bases 1 to 4857450) extraction	1191956	1191956	4117971	4117971	1	STM3909	A	SNP (transition)	G -> A	ilvC CDS	Truncation	194		ketol-acid reductoisomerase	ketol-acid reductoisomerase. (SW:ILVC_SALTY)
Salmonella enterica subsp. enterica serovar Typhimurium str. LT2 - NC_003197.2 (bases 1 to 4857450) extraction	1195959	1195959	4121974	4121974	1	STM3913	A	SNP (transition)	G -> A	gppA CDS	None	450		guanosine-5'-triphosphate,3'-diphosphate pyrophosphatase	similar to E. coli guanosine pentaphosphatase; exopolyphosphatase (AAC76784.1); Blastp hit to AAC76784.1 (494 aa), 89% identity in aa 1 - 493
Salmonella enterica subsp. enterica serovar Typhimurium str. LT2 - NC_003197.2 (bases 1 to 4857450) extraction	1196454	1196454	4122469	4122469	1	STM3913	A	SNP (transition)	G -> A	gppA CDS	None	285		guanosine-5'-triphosphate,3'-diphosphate pyrophosphatase	similar to E. coli guanosine pentaphosphatase; exopolyphosphatase (AAC76784.1); Blastp hit to AAC76784.1 (494 aa), 89% identity in aa 1 - 493
Salmonella enterica subsp. enterica serovar Typhimurium str. LT2 - NC_003197.2 (bases 1 to 4857450) extraction	1215205	1215205	4141220	4141220	1		T	SNP (transition)	C -> T
Salmonella enterica subsp. enterica serovar Typhimurium str. LT2 - NC_003197.2 (bases 1 to 4857450) extraction	1215397	1215397	4141412	4141412	1		T	SNP (transition)	C -> T
Salmonella enterica subsp. enterica serovar Typhimurium str. LT2 - NC_003197.2 (bases 1 to 4857450) extraction	1216712	1216712	4142727	4142727	1	STM3935	T	SNP (transition)	C -> T	hemY CDS	None	136		protein for a late step of protoheme IX synthesis	similar to E. coli a late step of protoheme IX synthesis (AAC76805.1); Blastp hit to AAC76805.1 (398 aa), 95% identity in aa 1 - 398
Salmonella enterica subsp. enterica serovar Typhimurium str. LT2 - NC_003197.2 (bases 1 to 4857450) extraction	1218013	1218013	4144028	4144028	1	STM3936	T	SNP (transition)	C -> T	hemX CDS	None	92		uroporphyrinogen-III C-methyltransferase	similar to E. coli uroporphyrinogen III methylase (AAC76806.1); Blastp hit to AAC76806.1 (393 aa), 87% identity in aa 1 - 393
Salmonella enterica subsp. enterica serovar Typhimurium str. LT2 - NC_003197.2 (bases 1 to 4857450) extraction	1222681	1222681	4148696	4148696	1	STM3939	T	SNP (transversion)	G -> T	cyaA CDS	Truncation	773		adenylate cyclase	adenylate cyclase. (SW:CYAA_SALTY)
Salmonella enterica subsp. enterica serovar Typhimurium str. LT2 - NC_003197.2 (bases 1 to 4857450) extraction	1244636	1244636	4170651	4170651	1	STM3965	A	SNP (transition)	G -> A	metE CDS	Substitution	293	G -> R	5-methyltetrahydropteroyltriglutamate-- homocysteine S-methyltransferase	5-methyltetrahydropteroyltriglutamate--homocysteinemethyltransferase. (SW:METE_SALTY)
Salmonella enterica subsp. enterica serovar Typhimurium str. LT2 - NC_003197.2 (bases 1 to 4857450) extraction	1270057	1271598	4196072	4197613	1542	STM3988	rrsA rRNA							16S ribosomal RNA
Salmonella enterica subsp. enterica serovar Typhimurium - CP067397 (bases 1 to 4796208) extraction	1270764	1272305	4134843	4136384	1542	JJB81_20055	16S rRNA							16S ribosomal RNA	Derived by automated computational analysis using gene prediction method: cmsearch.
Salmonella enterica subsp. enterica serovar Typhimurium str. LT2 - NC_003197.2 (bases 1 to 4857450) extraction	1272114	1275108	4198129	4201123	2995	STM3991	rrlA rRNA							23S ribosomal RNA
Salmonella enterica subsp. enterica serovar Typhimurium - CP067397 (bases 1 to 4796208) extraction	1272821	1275812	4136900	4139891	2992	JJB81_20070	23S rRNA							23S ribosomal RNA	Derived by automated computational analysis using gene prediction method: cmsearch.
Salmonella enterica subsp. enterica serovar Typhimurium str. LT2 - NC_003197.2 (bases 1 to 4857450) extraction	1274351	1274351	4200366	4200366	1		T	SNP (transition)	C -> T
Salmonella enterica subsp. enterica serovar Typhimurium str. LT2 - NC_003197.2 (bases 1 to 4857450) extraction	1275300	1275421	4201315	4201436	122	STM3992	rrfA rRNA							5S ribosomal RNA
Salmonella enterica subsp. enterica serovar Typhimurium - CP067397 (bases 1 to 4796208) extraction	1276009	1276124	4140088	4140203	116	JJB81_20075	rrf rRNA							5S ribosomal RNA	Derived by automated computational analysis using gene prediction method: cmsearch.
Salmonella enterica subsp. enterica serovar Typhimurium str. LT2 - NC_003197.2 (bases 1 to 4857450) extraction	1384941	1384941	4310956	4310956	1	STM4101	T	SNP (transition)	C -> T	metL CDS	Substitution	23	A -> V	bifunctional aspartate kinase/homoserine dehydrogenase II	bifunctional; similar to E. coli aspartokinase II and homoserine dehydrogenase II (AAC76922.1); Blastp hit to AAC76922.1 (810 aa), 94% identity in aa 1 - 810
Salmonella enterica subsp. enterica serovar Typhimurium str. LT2 - NC_003197.2 (bases 1 to 4857450) extraction	1425128	1426671	4351143	4352686	1544	STM4132	rrsB rRNA							16S ribosomal RNA
Salmonella enterica subsp. enterica serovar Typhimurium - CP067397 (bases 1 to 4796208) extraction	1425835	1427376	4289914	4291455	1542	JJB81_20775	16S rRNA							16S ribosomal RNA	Derived by automated computational analysis using gene prediction method: cmsearch.
Salmonella enterica subsp. enterica serovar Typhimurium str. LT2 - NC_003197.2 (bases 1 to 4857450) extraction	1425724	1425724	4351739	4351739	1		A	SNP (transition)	G -> A
Salmonella enterica subsp. enterica serovar Typhimurium str. LT2 - NC_003197.2 (bases 1 to 4857450) extraction	1427185	1430178	4353200	4356193	2994	STM4135	rrlB rRNA							23S ribosomal RNA
Salmonella enterica subsp. enterica serovar Typhimurium - CP067397 (bases 1 to 4796208) extraction	1427892	1430883	4291971	4294962	2992	JJB81_20790	23S rRNA							23S ribosomal RNA	Derived by automated computational analysis using gene prediction method: cmsearch.
Salmonella enterica subsp. enterica serovar Typhimurium str. LT2 - NC_003197.2 (bases 1 to 4857450) extraction	1428866	1428867	4354881	4354882	2		TC	Substitution	CG -> TC
Salmonella enterica subsp. enterica serovar Typhimurium str. LT2 - NC_003197.2 (bases 1 to 4857450) extraction	1428996	1428996	4355011	4355011	1		A	SNP (transition)	G -> A
Salmonella enterica subsp. enterica serovar Typhimurium str. LT2 - NC_003197.2 (bases 1 to 4857450) extraction	1429142	1429142	4355157	4355157	1		T	SNP (transition)	C -> T
Salmonella enterica subsp. enterica serovar Typhimurium str. LT2 - NC_003197.2 (bases 1 to 4857450) extraction	1430371	1430491	4356386	4356506	121	STM4136	rrfB rRNA							5S ribosomal RNA
Salmonella enterica subsp. enterica serovar Typhimurium - CP067397 (bases 1 to 4796208) extraction	1431080	1431195	4295159	4295274	116	JJB81_20795	rrf rRNA							5S ribosomal RNA	Derived by automated computational analysis using gene prediction method: cmsearch.
Salmonella enterica subsp. enterica serovar Typhimurium str. LT2 - NC_003197.2 (bases 1 to 4857450) extraction	1468673	1470217	4394688	4396232	1545	STM4177	rrsE rRNA							16S ribosomal RNA
Salmonella enterica subsp. enterica serovar Typhimurium - CP067397 (bases 1 to 4796208) extraction	1469380	1470921	4333459	4335000	1542	JJB81_20995	16S rRNA							16S ribosomal RNA	Derived by automated computational analysis using gene prediction method: cmsearch.
Salmonella enterica subsp. enterica serovar Typhimurium str. LT2 - NC_003197.2 (bases 1 to 4857450) extraction	1470190	1470190	4396205	4396205	1			Deletion (tandem repeat)	(A)3 -> (A)2
Salmonella enterica subsp. enterica serovar Typhimurium str. LT2 - NC_003197.2 (bases 1 to 4857450) extraction	1470609	1473602	4396624	4399617	2994	STM4179	rrlE rRNA							23S ribosomal RNA
Salmonella enterica subsp. enterica serovar Typhimurium - CP067397 (bases 1 to 4796208) extraction	1471315	1474306	4335394	4338385	2992	JJB81_21005	23S rRNA							23S ribosomal RNA	Derived by automated computational analysis using gene prediction method: cmsearch.
Salmonella enterica subsp. enterica serovar Typhimurium str. LT2 - NC_003197.2 (bases 1 to 4857450) extraction	1471626	1471626	4397641	4397641	1		A	SNP (transition)	G -> A
Salmonella enterica subsp. enterica serovar Typhimurium str. LT2 - NC_003197.2 (bases 1 to 4857450) extraction	1473795	1473916	4399810	4399931	122	STM4180	rrfE rRNA							5S ribosomal RNA
Salmonella enterica subsp. enterica serovar Typhimurium - CP067397 (bases 1 to 4796208) extraction	1474503	1474618	4338582	4338697	116	JJB81_21010	rrf rRNA							5S ribosomal RNA	Derived by automated computational analysis using gene prediction method: cmsearch.
Salmonella enterica subsp. enterica serovar Typhimurium str. LT2 - NC_003197.2 (bases 1 to 4857450) extraction	1475665	1475674	4401680	4401689	10	STM4182		Deletion	=-CCTGGCGCAG	metA CDS	Frame Shift	276		homoserine O-succinyltransferase	homoserine O-succinyltransferase. (SW:META_SALTY)
Salmonella enterica subsp. enterica serovar Typhimurium str. LT2 - NC_003197.2 (bases 1 to 4857450) extraction	1503615	1503615	4429630	4429630	1	STM4210	A	SNP (transition)	G -> A	putative methyl-accepting chemotaxis protein CDS	None	306		putative methyl-accepting chemotaxis protein
Salmonella enterica subsp. enterica serovar Typhimurium str. LT2 - NC_003197.2 (bases 1 to 4857450) extraction	1508369	1508369	4434384	4434384	1	STM4213	A	SNP (transition)	G -> A	phage tail protein CDS	None	341		phage tail protein
Salmonella enterica subsp. enterica serovar Typhimurium str. LT2 - NC_003197.2 (bases 1 to 4857450) extraction	1562338	1562338	4488353	4488353	1	STM4261	T	SNP (transition)	C -> T	hypothetical protein CDS	Substitution	1955	S -> F	hypothetical protein	fusion of two hypothetical proteins; (gi|7467255) and (gi|7467255)
Salmonella enterica subsp. enterica serovar Typhimurium str. LT2 - NC_003197.2 (bases 1 to 4857450) extraction	1594619	1594619	4520634	4520634	1	STM4281	A	SNP (transition)	G -> A	nrfE CDS	Substitution	263	A -> T	nitrite reductase	involved in attachment of haem c to cytochrome c552; similar to E. coli formate-dependent nitrite reductase; possible assembly function (AAD13457.1); Blastp hit to AAD13457.1 (552 aa), 76% identity in aa 1 - 552
Salmonella enterica subsp. enterica serovar Typhimurium str. LT2 - NC_003197.2 (bases 1 to 4857450) extraction	1614480	1614480	4540495	4540495	1	STM4296	A	SNP (transition)	G -> A	adi CDS	None	163		arginine decarboxylase	catabolic; inducible by acid; similar to E. coli biodegradative arginine decarboxylase (AAC77078.1); Blastp hit to AAC77078.1 (756 aa), 92% identity in aa 1 - 756
Salmonella enterica subsp. enterica serovar Typhimurium str. LT2 - NC_003197.2 (bases 1 to 4857450) extraction	1623688	1623688	4549703	4549703	1	STM4303	A	SNP (transition)	G -> A	dcuR CDS	None	70		two-component system response regulator DcuR	regulates anaerobic fumarate respiration; similar to E. coli putative 2-component transcriptional regulator (AAC77085.1); Blastp hit to AAC77085.1 (239 aa), 88% identity in aa 1 - 239
Salmonella enterica subsp. enterica serovar Typhimurium str. LT2 - NC_003197.2 (bases 1 to 4857450) extraction	1633274	1633932	4559289	4559947	659		mobile element
Salmonella enterica subsp. enterica serovar Typhimurium str. LT2 - NC_003197.2 (bases 1 to 4857450) extraction	1633726	1633726	4559741	4559741	1	STM4311	A	SNP (transition)	G -> A	tnpA 6 CDS	Substitution	104	E -> K	IS200/IS605 family transposase	transposase for insertion sequence element IS200 (SW:T200_SALTY)
Salmonella enterica subsp. enterica serovar Typhimurium str. LT2 - NC_003197.2 (bases 1 to 4857450) extraction	1638299	1638299	4564314	4564314	1	STM4319	A	SNP (transition)	G -> A	phoN CDS	Substitution	15	A -> V	phosphatase PAP2 family protein	nonspecific acid phosphatase precursor. (SW:PHON_SALTY)
Salmonella enterica subsp. enterica serovar Typhimurium str. LT2 - NC_003197.2 (bases 1 to 4857450) extraction	1651800	1651800	4577815	4577815	1	STM4332	A	SNP (transition)	G -> A	yjeJ CDS	Substitution	154	A -> V	hypothetical protein	similar to E. coli orf, hypothetical protein (AAC77105.1); Blastp hit to AAC77105.1 (289 aa), 58% identity in aa 1 - 283
Salmonella enterica subsp. enterica serovar Typhimurium str. LT2 - NC_003197.2 (bases 1 to 4857450) extraction	1655456	1655456	4581471	4581471	1		A	SNP (transition)	G -> A
Salmonella enterica subsp. enterica serovar Typhimurium str. LT2 - NC_003197.2 (bases 1 to 4857450) extraction	1665046	1665046	4591061	4591061	1	STM4347	T	SNP (transition)	C -> T	yjeP CDS	None	505		miniconductance mechanosensitive channel MscM	similar to E. coli putative periplasmic binding protein (AAC77119.1); Blastp hit to AAC77119.1 (1107 aa), 89% identity in aa 1 - 1107
Salmonella enterica subsp. enterica serovar Typhimurium str. LT2 - NC_003197.2 (bases 1 to 4857450) extraction	1665819	1665819	4591834	4591834	1	STM4347	T	SNP (transition)	C -> T	yjeP CDS	Substitution	248	A -> T	miniconductance mechanosensitive channel MscM	similar to E. coli putative periplasmic binding protein (AAC77119.1); Blastp hit to AAC77119.1 (1107 aa), 89% identity in aa 1 - 1107
Salmonella enterica subsp. enterica serovar Typhimurium str. LT2 - NC_003197.2 (bases 1 to 4857450) extraction	1668124	1668124	4594139	4594139	1	STM4349	T	SNP (transition)	C -> T	yjeQ CDS	Substitution	198	V -> I	putative GTPase	similar to E. coli orf, hypothetical protein (AAC77121.1); Blastp hit to AAC77121.1 (337 aa), 94% identity in aa 1 - 337
Salmonella enterica subsp. enterica serovar Typhimurium str. LT2 - NC_003197.2 (bases 1 to 4857450) extraction	1670628	1670628	4596643	4596643	1		C	SNP (transition)	T -> C
Salmonella enterica subsp. enterica serovar Typhimurium str. LT2 - NC_003197.2 (bases 1 to 4857450) extraction	1675067	1675067	4601082	4601082	1	STM4358	G	SNP (transition)	A -> G	amiB CDS	Substitution	235	T -> A	N-acetylmuramoyl-L-alanine amidase AmiB	murein hydrolase; N-acetylmuramoyl-L-alanine amidase AMIB. (SW:AMIB_SALTY)
Salmonella enterica subsp. enterica serovar Typhimurium str. LT2 - NC_003197.2 (bases 1 to 4857450) extraction	1675230	1675230	4601245	4601245	1	STM4358	C	SNP (transition)	T -> C	amiB CDS	Substitution	289	M -> T	N-acetylmuramoyl-L-alanine amidase AmiB	murein hydrolase; N-acetylmuramoyl-L-alanine amidase AMIB. (SW:AMIB_SALTY)
Salmonella enterica subsp. enterica serovar Typhimurium str. LT2 - NC_003197.2 (bases 1 to 4857450) extraction	1676945	1676945	4602960	4602960	1	STM4359	T	SNP (transition)	C -> T	mutL CDS	Substitution	418	P -> S	DNA mismatch repair protein MutL	stimulates binding of Vsr and MutS to heteroduplex DNA; DNA mismatch repair protein MUTL. (SW:MUTL_SALTY)
Salmonella enterica subsp. enterica serovar Typhimurium str. LT2 - NC_003197.2 (bases 1 to 4857450) extraction	1705051	1705051	4631066	4631066	1	STM4392	A	SNP (transition)	G -> A	priB CDS	Substitution	46	A -> T	primosomal replication protein N	similar to E. coli primosomal replication protein N(AAC77158.1); Blastp hit to AAC77158.1 (104 aa), 99%identity in aa 1 - 104
Salmonella enterica subsp. enterica serovar Typhimurium str. LT2 - NC_003197.2 (bases 1 to 4857450) extraction	1707997	1707997	4634012	4634012	1	STM4397	A	SNP (transition)	G -> A	fklB CDS	None	36		FKBP-type 22KD peptidyl-prolyl cis-trans isomerase	similar to E. coli FKBP-type 22KD peptidyl-prolyl cis-trans isomerase (rotamase) (AAC77164.1); Blastp hit to AAC77164.1 (259 aa), 92% identity in aa 41 - 259
Salmonella enterica subsp. enterica serovar Typhimurium str. LT2 - NC_003197.2 (bases 1 to 4857450) extraction	1709071	1709071	4635086	4635086	1	STM4398	A	SNP (transition)	G -> A	cycA CDS	Substitution	75	G -> E	D-serine/D-alanine/glycine transporter	similar to E. coli transport of D-alanine, D-serine, and glycine (AAC77165.1); Blastp hit to AAC77165.1 (470 aa), 95% identity in aa 1 - 469
Salmonella enterica subsp. enterica serovar Typhimurium str. LT2 - NC_003197.2 (bases 1 to 4857450) extraction	1712346	1712346	4638361	4638361	1	STM4401	A	SNP (transition)	G -> A	ytfG CDS	Substitution	228	A -> V	NAD(P)-dependent oxidoreductase	similar to E. coli putative oxidoreductase (AAC77168.1); Blastp hit to AAC77168.1 (286 aa), 80% identity in aa 1 - 278
Salmonella enterica subsp. enterica serovar Typhimurium str. LT2 - NC_003197.2 (bases 1 to 4857450) extraction	1713551	1713551	4639566	4639566	1		A	SNP (transition)	G -> A
Salmonella enterica subsp. enterica serovar Typhimurium str. LT2 - NC_003197.2 (bases 1 to 4857450) extraction	1714774	1714774	4640789	4640789	1	STM4403	A	SNP (transition)	G -> A	cpdB CDS	Substitution	244	L -> F	2',3'-cyclic-nucleotide 2'-phosphodiesterase	2',3'-cyclic-nucleotide 2'-phosphodiesterase precursor. (SW:CN16_SALTY)
Salmonella enterica subsp. enterica serovar Typhimurium str. LT2 - NC_003197.2 (bases 1 to 4857450) extraction	1717647	1717647	4643662	4643662	1		A	SNP (transition)	G -> A
Salmonella enterica subsp. enterica serovar Typhimurium str. LT2 - NC_003197.2 (bases 1 to 4857450) extraction	1717672	1717672	4643687	4643687	1		A	SNP (transition)	G -> A
Salmonella enterica subsp. enterica serovar Typhimurium str. LT2 - NC_003197.2 (bases 1 to 4857450) extraction	1719185	1719185	4645200	4645200	1		T	SNP (transition)	C -> T
Salmonella enterica subsp. enterica serovar Typhimurium str. LT2 - NC_003197.2 (bases 1 to 4857450) extraction	1721787	1721787	4647802	4647802	1	STM4410	A	SNP (transition)	G -> A	ytfN CDS	Substitution	2	S -> N	translocation/assembly module TamB	similar to E. coli orf, hypothetical protein (AAC77178.1); Blastp hit to AAC77178.1 (1259 aa), 86% identity in aa 1 - 1259
Salmonella enterica subsp. enterica serovar Typhimurium str. LT2 - NC_003197.2 (bases 1 to 4857450) extraction	1722543	1722543	4648558	4648558	1	STM4410	A	SNP (transition)	G -> A	ytfN CDS	Substitution	254	R -> H	translocation/assembly module TamB	similar to E. coli orf, hypothetical protein (AAC77178.1); Blastp hit to AAC77178.1 (1259 aa), 86% identity in aa 1 - 1259
Salmonella enterica subsp. enterica serovar Typhimurium str. LT2 - NC_003197.2 (bases 1 to 4857450) extraction	1727167	1727167	4653182	4653182	1	STM4412	A	SNP (transition)	G -> A	MFS transporter CDS	Substitution	2	T -> I	MFS transporter	similar to E. coli D-galactonate transport (AAC76714.1); Blastp hit to AAC76714.1 (445 aa), 31% identity in aa 42 - 197, 21% identity in aa 257 - 442
Salmonella enterica subsp. enterica serovar Typhimurium str. LT2 - NC_003197.2 (bases 1 to 4857450) extraction	1731719	1731719	4657734	4657734	1	STM4416	A	SNP (transition)	G -> A	mpl CDS	Substitution	350	G -> D	UDP-N-acetylmuramate:L-alanyl-gamma-D-glutamyl- meso-diaminopimelate ligase	similar to E. coli putative ligase (AAC77190.1); Blastp hit to AAC77190.1 (457 aa), 96% identity in aa 1 - 454
Salmonella enterica subsp. enterica serovar Typhimurium str. LT2 - NC_003197.2 (bases 1 to 4857450) extraction	1736672	1736672	4662687	4662687	1	STM4419	A	SNP (transition)	G -> A	MFS transporter CDS	None	452		MFS transporter	similar to E. coli xylose-proton symport (AAC77001.1); Blastp hit to AAC77001.1 (491 aa), 33% identity in aa 58 - 486, 39% identity in aa 3 - 106
Salmonella enterica subsp. enterica serovar Typhimurium str. LT2 - NC_003197.2 (bases 1 to 4857450) extraction	1738019	1738019	4664034	4664034	1	STM4421	A	SNP (transition)	G -> A	methylmalonate-semialdehyde dehydrogenase (acylating) CDS	Substitution	476	T -> I	methylmalonate-semialdehyde dehydrogenase (acylating)	similar to E. coli phenylacetaldehyde dehydrogenase(AAC74467.1); Blastp hit to AAC74467.1 (500 aa), 34%identity in aa 22 - 500
Salmonella enterica subsp. enterica serovar Typhimurium str. LT2 - NC_003197.2 (bases 1 to 4857450) extraction	1748167	1748167	4674182	4674182	1	STM4430	A	SNP (transition)	G -> A	putative sugar kinase CDS	Substitution	63	S -> F	putative sugar kinase	ribokinase family
Salmonella enterica subsp. enterica serovar Typhimurium str. LT2 - NC_003197.2 (bases 1 to 4857450) extraction	1748811	1748811	4674826	4674826	1	STM4431	A	SNP (transition)	G -> A	3D-(3,5/4)-trihydroxycyclohexane-1,2-dione acylhydrolase (decyclizing) CDS	Substitution	14	R -> H	3D-(3,5/4)-trihydroxycyclohexane-1,2-dione acylhydrolase (decyclizing)	similar to E. coli acetolactate synthase I, valine-sensitive, large subunit (AAC76694.1); Blastp hit to AAC76694.1 (562 aa), 27% identity in aa 26 - 326, 34% identity in aa 12 - 126
Salmonella enterica subsp. enterica serovar Typhimurium str. LT2 - NC_003197.2 (bases 1 to 4857450) extraction	1750664	1750664	4676679	4676679	1	STM4431	A	SNP (transition)	G -> A	3D-(3,5/4)-trihydroxycyclohexane-1,2-dione acylhydrolase (decyclizing) CDS	Substitution	632	V -> I	3D-(3,5/4)-trihydroxycyclohexane-1,2-dione acylhydrolase (decyclizing)	similar to E. coli acetolactate synthase I, valine-sensitive, large subunit (AAC76694.1); Blastp hit to AAC76694.1 (562 aa), 27% identity in aa 26 - 326, 34% identity in aa 12 - 126
Salmonella enterica subsp. enterica serovar Typhimurium str. LT2 - NC_003197.2 (bases 1 to 4857450) extraction	1750664	1750664	4676679	4676679	1	STM4432	A	SNP (transition)	G -> A	putative thiamine pyrophosphate-requiring enzyme CDS	Substitution	255	V -> I	putative thiamine pyrophosphate-requiring enzyme	similar to E. coli glyoxylate carboligase (AAC73609.1); Blastp hit to AAC73609.1 (593 aa), 33% identity in aa 421 - 539
Salmonella enterica subsp. enterica serovar Typhimurium str. LT2 - NC_003197.2 (bases 1 to 4857450) extraction	1751048	1751048	4677063	4677063	1	STM4433	A	SNP (transition)	G -> A	inositol 2-dehydrogenase CDS	Substitution	53	G -> R	inositol 2-dehydrogenase	oxidoreductase family; similar to E. coli putative virulence factor (AAC74152.1); Blastp hit to AAC74152.1 (307 aa), 29% identity in aa 1 - 188, 52% identity in aa 272 - 296
Salmonella enterica subsp. enterica serovar Typhimurium str. LT2 - NC_003197.2 (bases 1 to 4857450) extraction	1755019	1755019	4681034	4681034	1	STM4436	A	SNP (transition)	G -> A	protein iolH CDS	Substitution	260	G -> S	protein iolH
Salmonella enterica subsp. enterica serovar Typhimurium str. LT2 - NC_003197.2 (bases 1 to 4857450) extraction	1758265	1758265	4684280	4684280	1	STM4440	A	SNP (transition)	G -> A	putative cytoplasmic protein CDS	Substitution	108	A -> T	putative cytoplasmic protein	nitrogen regulation protein nr(ii) (SW:NTRB_SALTY)
Salmonella enterica subsp. enterica serovar Typhimurium str. LT2 - NC_003197.2 (bases 1 to 4857450) extraction	1759067	1759067	4685082	4685082	1	STM4443	A	SNP (transition)	G -> A	hypothetical protein CDS	Substitution	30	A -> T	hypothetical protein
Salmonella enterica subsp. enterica serovar Typhimurium str. LT2 - NC_003197.2 (bases 1 to 4857450) extraction	1760369	1760369	4686384	4686384	1	STM4444	A	SNP (transition)	G -> A	hypothetical protein CDS	Substitution	201	G -> D	hypothetical protein
Salmonella enterica subsp. enterica serovar Typhimurium str. LT2 - NC_003197.2 (bases 1 to 4857450) extraction	1762811	1762811	4688826	4688826	1	STM4447	A	SNP (transition)	G -> A	2-dehydro-3-deoxyphosphooctonate aldolase CDS	Substitution	37	V -> I	2-dehydro-3-deoxyphosphooctonate aldolase
Salmonella enterica subsp. enterica serovar Typhimurium str. LT2 - NC_003197.2 (bases 1 to 4857450) extraction	1765950	1765950	4691965	4691965	1	STM4450	A	SNP (transition)	G -> A	mRNA-degrading endonuclease RelE CDS	Substitution	90	A -> T	mRNA-degrading endonuclease RelE	similar to E. coli orf, hypothetical protein (AAC74636.1); Blastp hit to AAC74636.1 (95 aa), 67% identity in aa 1 - 94
Salmonella enterica subsp. enterica serovar Typhimurium str. LT2 - NC_003197.2 (bases 1 to 4857450) extraction	1767081	1767081	4693096	4693096	1	STM4452	A	SNP (transition)	G -> A	nrdD CDS	None	538		anaerobic ribonucleoside-triphosphate reductase	similar to E. coli anaerobic ribonucleoside-triphosphate reductase (AAC77195.1); Blastp hit to AAC77195.1 (712 aa), 96% identity in aa 1 - 712
Salmonella enterica subsp. enterica serovar Typhimurium str. LT2 - NC_003197.2 (bases 1 to 4857450) extraction	1767954	1767954	4693969	4693969	1	STM4452	A	SNP (transition)	G -> A	nrdD CDS	None	247		anaerobic ribonucleoside-triphosphate reductase	similar to E. coli anaerobic ribonucleoside-triphosphate reductase (AAC77195.1); Blastp hit to AAC77195.1 (712 aa), 96% identity in aa 1 - 712
Salmonella enterica subsp. enterica serovar Typhimurium str. LT2 - NC_003197.2 (bases 1 to 4857450) extraction	1772001	1772001	4698016	4698016	1		A	SNP (transition)	G -> A
Salmonella enterica subsp. enterica serovar Typhimurium str. LT2 - NC_003197.2 (bases 1 to 4857450) extraction	1774879	1774879	4700894	4700894	1	STM4456	A	SNP (transition)	G -> A	mgtA CDS	Substitution	397	G -> S	magnesium-translocating P-type ATPase	Mg2+ ATPase transporter; Mg(2+) transport ATPase, P-type 1. (SW:ATMA_SALTY)
Salmonella enterica subsp. enterica serovar Typhimurium str. LT2 - NC_003197.2 (bases 1 to 4857450) extraction	1775395	1775395	4701410	4701410	1	STM4456	A	SNP (transition)	G -> A	mgtA CDS	Substitution	569	V -> M	magnesium-translocating P-type ATPase	Mg2+ ATPase transporter; Mg(2+) transport ATPase, P-type 1. (SW:ATMA_SALTY)
Salmonella enterica subsp. enterica serovar Typhimurium str. LT2 - NC_003197.2 (bases 1 to 4857450) extraction	1780925	1780925	4706940	4706940	1	STM4464		Deletion (tandem repeat)	(C)5 -> (C)4	ion transporter superfamily protein CDS	Frame Shift	97		ion transporter superfamily protein	similar to E. coli putative S-transferase (AAC75358.1); Blastp hit to AAC75358.1 (513 aa), 31% identity in aa 103 - 509, 30% identity in aa 19 - 48
Salmonella enterica subsp. enterica serovar Typhimurium str. LT2 - NC_003197.2 (bases 1 to 4857450) extraction	1781862	1781862	4707877	4707877	1	STM4465	A	SNP (transition)	G -> A	putative ornithine carbamoyltransferase CDS	Truncation	138		putative ornithine carbamoyltransferase	similar to E. coli ornithine carbamoyltransferase 1(AAC77211.1); Blastp hit to AAC77211.1 (334 aa), 68%identity in aa 6 - 332
Salmonella enterica subsp. enterica serovar Typhimurium str. LT2 - NC_003197.2 (bases 1 to 4857450) extraction	1785289	1785289	4711304	4711304	1	STM4468	A	SNP (transition)	G -> A	yjgK CDS	None	22		toxin-antitoxin biofilm protein TabA	similar to E. coli orf, hypothetical protein (AAC77209.1); Blastp hit to AAC77209.1 (153 aa), 80% identity in aa 4 - 153
Salmonella enterica subsp. enterica serovar Typhimurium str. LT2 - NC_003197.2 (bases 1 to 4857450) extraction	1785540	1785540	4711555	4711555	1	STM4468	A	SNP (transition)	G -> A	yjgK CDS	Substitution	106	S -> N	toxin-antitoxin biofilm protein TabA	similar to E. coli orf, hypothetical protein (AAC77209.1); Blastp hit to AAC77209.1 (153 aa), 80% identity in aa 4 - 153
Salmonella enterica subsp. enterica serovar Typhimurium str. LT2 - NC_003197.2 (bases 1 to 4857450) extraction	1785627	1785627	4711642	4711642	1	STM4468	A	SNP (transition)	G -> A	yjgK CDS	Substitution	135	G -> E	toxin-antitoxin biofilm protein TabA	similar to E. coli orf, hypothetical protein (AAC77209.1); Blastp hit to AAC77209.1 (153 aa), 80% identity in aa 4 - 153
Salmonella enterica subsp. enterica serovar Typhimurium str. LT2 - NC_003197.2 (bases 1 to 4857450) extraction	1798349	1798349	4724364	4724364	1	STM4480	A	SNP (transition)	G -> A	yjgQ CDS	Substitution	298	G -> E	lipopolysaccharide ABC transporter permease LptG	similar to E. coli orf, hypothetical protein (AAC77219.1); Blastp hit to AAC77219.1 (361 aa), 97% identity in aa 2 - 361
Salmonella enterica subsp. enterica serovar Typhimurium str. LT2 - NC_003197.2 (bases 1 to 4857450) extraction	1799880	1799880	4725895	4725895	1	STM4482	A	SNP (transition)	G -> A	idnT CDS	None	412		gluconate permease	similar to E. coli L-idonate transporter (AAC77222.1); Blastp hit to AAC77222.1 (439 aa), 94% identity in aa 1 - 439
Salmonella enterica subsp. enterica serovar Typhimurium str. LT2 - NC_003197.2 (bases 1 to 4857450) extraction	1807422	1807422	4733437	4733437	1	STM4489	T	SNP (transition)	C -> T	DNA helicase CDS	Substitution	486	A -> V	DNA helicase	similar to E. coli putative frameshift suppressor (AAC77264.1); Blastp hit to AAC77264.1 (338 aa), 68% identity in aa 1 - 338
Salmonella enterica subsp. enterica serovar Typhimurium str. LT2 - NC_003197.2 (bases 1 to 4857450) extraction	1813182	1813182	4739197	4739197	1	STM4492	A	SNP (transition)	G -> A	putative cytoplasmic protein CDS	Substitution	731	P -> S	putative cytoplasmic protein
Salmonella enterica subsp. enterica serovar Typhimurium str. LT2 - NC_003197.2 (bases 1 to 4857450) extraction	1813398	1813398	4739413	4739413	1	STM4492	A	SNP (transition)	G -> A	putative cytoplasmic protein CDS	Truncation	659		putative cytoplasmic protein
Salmonella enterica subsp. enterica serovar Typhimurium str. LT2 - NC_003197.2 (bases 1 to 4857450) extraction	1813796	1813796	4739811	4739811	1	STM4492	A	SNP (transition)	G -> A	putative cytoplasmic protein CDS	Substitution	526	P -> L	putative cytoplasmic protein
Salmonella enterica subsp. enterica serovar Typhimurium str. LT2 - NC_003197.2 (bases 1 to 4857450) extraction	1813880	1813880	4739895	4739895	1	STM4492	A	SNP (transition)	G -> A	putative cytoplasmic protein CDS	Substitution	498	T -> I	putative cytoplasmic protein
Salmonella enterica subsp. enterica serovar Typhimurium str. LT2 - NC_003197.2 (bases 1 to 4857450) extraction	1814098	1814098	4740113	4740113	1	STM4492	A	SNP (transition)	G -> A	putative cytoplasmic protein CDS	None	425		putative cytoplasmic protein
Salmonella enterica subsp. enterica serovar Typhimurium str. LT2 - NC_003197.2 (bases 1 to 4857450) extraction	1814915	1814915	4740930	4740930	1	STM4492	A	SNP (transition)	G -> A	putative cytoplasmic protein CDS	Substitution	153	A -> V	putative cytoplasmic protein
Salmonella enterica subsp. enterica serovar Typhimurium str. LT2 - NC_003197.2 (bases 1 to 4857450) extraction	1815304	1815304	4741319	4741319	1	STM4492	A	SNP (transition)	G -> A	putative cytoplasmic protein CDS	None	23		putative cytoplasmic protein
Salmonella enterica subsp. enterica serovar Typhimurium str. LT2 - NC_003197.2 (bases 1 to 4857450) extraction	1821006	1821006	4747021	4747021	1	STM4496	A	SNP (transition)	G -> A	DNA repair protein CDS	None	1208		DNA repair protein
Salmonella enterica subsp. enterica serovar Typhimurium str. LT2 - NC_003197.2 (bases 1 to 4857450) extraction	1821011	1821011	4747026	4747026	1	STM4496	T	SNP (transition)	C -> T	DNA repair protein CDS	Substitution	1207	G -> S	DNA repair protein
Salmonella enterica subsp. enterica serovar Typhimurium str. LT2 - NC_003197.2 (bases 1 to 4857450) extraction	1821014	1821014	4747029	4747029	1	STM4496	T	SNP (transition)	C -> T	DNA repair protein CDS	Substitution	1206	A -> T	DNA repair protein
Salmonella enterica subsp. enterica serovar Typhimurium str. LT2 - NC_003197.2 (bases 1 to 4857450) extraction	1821199	1821199	4747214	4747214	1	STM4496	A	SNP (transition)	G -> A	DNA repair protein CDS	Substitution	1144	A -> V	DNA repair protein
Salmonella enterica subsp. enterica serovar Typhimurium str. LT2 - NC_003197.2 (bases 1 to 4857450) extraction	1821826	1821826	4747841	4747841	1	STM4496	A	SNP (transition)	G -> A	DNA repair protein CDS	Substitution	935	S -> L	DNA repair protein
Salmonella enterica subsp. enterica serovar Typhimurium str. LT2 - NC_003197.2 (bases 1 to 4857450) extraction	1828682	1828682	4754697	4754697	1	STM4500	A	SNP (transition)	G -> A	yjhP CDS	None	298		putative SAM-dependent methyltransferase	similar to E. coli putative methyltransferase (AAC77262.1); Blastp hit to AAC77262.1 (248 aa), 30% identity in aa 1 - 138
Salmonella enterica subsp. enterica serovar Typhimurium str. LT2 - NC_003197.2 (bases 1 to 4857450) extraction	1830356	1830356	4756371	4756371	1	STM4502	A	SNP (transition)	G -> A	hypothetical protein CDS	Substitution	11	G -> R	hypothetical protein
Salmonella enterica subsp. enterica serovar Typhimurium str. LT2 - NC_003197.2 (bases 1 to 4857450) extraction	1839779	1839779	4765794	4765794	1	STM4511	A	SNP (transition)	G -> A	yjiE CDS	Substitution	67	L -> F	putative LysR family transcriptional regulator	similar to E. coli putative transcriptional regulator LYSR-type (AAC77283.1); Blastp hit to AAC77283.1 (303 aa), 81% identity in aa 1 - 302
Salmonella enterica subsp. enterica serovar Typhimurium str. LT2 - NC_003197.2 (bases 1 to 4857450) extraction	1844557	1844557	4770572	4770572	1		A	SNP (transition)	G -> A
Salmonella enterica subsp. enterica serovar Typhimurium str. LT2 - NC_003197.2 (bases 1 to 4857450) extraction	1846982	1846982	4772997	4772997	1	STM4517	A	SNP (transition)	G -> A	yjiO CDS	Substitution	102	T -> I	MFS transporter	similar to E. coli putative transport protein (AAC77293.1); Blastp hit to AAC77293.1 (410 aa), 86% identity in aa 3 - 410
Salmonella enterica subsp. enterica serovar Typhimurium str. LT2 - NC_003197.2 (bases 1 to 4857450) extraction	1848763	1848763	4774778	4774778	1	STM4519	A	SNP (transition)	G -> A	succinate-semialdehyde dehydrogenase CDS	None	101		succinate-semialdehyde dehydrogenase	similar to E. coli putative aldehyde dehydrogenase (AAC74598.1); Blastp hit to AAC74598.1 (470 aa), 42% identity in aa 19 - 465
Salmonella enterica subsp. enterica serovar Typhimurium str. LT2 - NC_003197.2 (bases 1 to 4857450) extraction	1850498	1850498	4776513	4776513	1	STM4522	A	SNP (transition)	G -> A	hypothetical protein CDS	Substitution	160	T -> I	hypothetical protein
Salmonella enterica subsp. enterica serovar Typhimurium str. LT2 - NC_003197.2 (bases 1 to 4857450) extraction	1855503	1855503	4781518	4781518	1	STM4526	A	SNP (transition)	G -> A	hsdR CDS	None	923		type I restriction-modification system endonuclease	host restriction; similar to E. coli host restriction; endonuclease R (AAC77306.1); Blastp hit to AAC77306.1 (1188 aa), 91% identity in aa 20 - 1188
Salmonella enterica subsp. enterica serovar Typhimurium str. LT2 - NC_003197.2 (bases 1 to 4857450) extraction	1855799	1855799	4781814	4781814	1	STM4526	A	SNP (transition)	G -> A	hsdR CDS	Substitution	825	R -> C	type I restriction-modification system endonuclease	host restriction; similar to E. coli host restriction; endonuclease R (AAC77306.1); Blastp hit to AAC77306.1 (1188 aa), 91% identity in aa 20 - 1188
Salmonella enterica subsp. enterica serovar Typhimurium str. LT2 - NC_003197.2 (bases 1 to 4857450) extraction	1858954	1858954	4784969	4784969	1	STM4527	T	SNP (transition)	C -> T	mrr CDS	None	162		restriction endonuclease	similar to E. coli restriction of methylated adenine (AAC77307.1); Blastp hit to AAC77307.1 (304 aa), 77% identity in aa 1 - 304
Salmonella enterica subsp. enterica serovar Typhimurium str. LT2 - NC_003197.2 (bases 1 to 4857450) extraction	1868364	1868364	4794379	4794379	1	STM4534	A	SNP (transition)	G -> A	Fis family transcriptional regulator CDS	Truncation	765		Fis family transcriptional regulator	similar to E. coli psp operon transcriptional activator (AAC74385.1); Blastp hit to AAC74385.1 (330 aa), 38% identity in aa 13 - 242
Salmonella enterica subsp. enterica serovar Typhimurium str. LT2 - NC_003197.2 (bases 1 to 4857450) extraction	1884758	1884758	4810773	4810773	1			Deletion (tandem repeat)	(G)8 -> (G)7
Salmonella enterica subsp. enterica serovar Typhimurium str. LT2 - NC_003197.2 (bases 1 to 4857450) extraction	1888060	1888060	4814075	4814075	1	STM4560	T	SNP (transition)	C -> T	prfC CDS	Substitution	57	S -> F	peptide chain release factor 3	peptide chain release factor 3 (RF-3). (SW:RF3_SALTY)
